# Supplementary material for: Identification of susceptibility modules and hub genes of osteoarthritis by WGCNA analysis
Source: Front Genet. 2022 Nov 18;13:1036156. doi: 10.3389/fgene.2022.1036156 (PMC9718428; doi:10.3389/fgene.2022.1036156)
Supplement: Supplementary file 4 [file Table4.XLSX]

## Sheet: Sheet1
geneNames	GSM1332201	GSM1332202	GSM1332203	GSM1332204	GSM1332205	GSM1332206	GSM1332207	GSM1332208	GSM1332209	GSM1332210	GSM1332211	GSM1332212	GSM1332213	GSM1332214	GSM1332215	GSM1332216	GSM1332217	GSM1332218	GSM1332219	GSM1332220
A1CF	113.2	79	146.2	131.1	156.8	137.5	186.5	196.3	132.9	150.1	169.5	120.9	116.6	94.3	98.4	130.2	152	174.2	140.3	174.2
A2M	1422.2	1847.4	2478.5	1707.6	2798.2	2695.2	3275.6	2505	2755.1	1781	2471.5	2323.2	1980.8	2786.9	2485.2	2570.7	2742.8	2903.8	2303.7	2396.8
A4GALT	44.4	48.2	62.7	98.4	98	39.8	132.1	155.7	58.2	75.1	67.9	37.9	49.3	40.8	40.9	45	41.4	31.8	34.1	32.8
A4GNT	55.8	43.5	102.9	66.4	57.5	52.4	80.6	74.9	70.6	95.4	42.8	45.2	75.4	44.8	48.8	44.6	84.2	49	60.4	102.1
AAAS	9.5	60.3	19.4	53.5	21.2	9.8	23.9	17.6	27.8	30.9	52.2	97.5	64	63.2	9.2	24	25.5	25.1	98.4	93.9
AACS	276.2	274.2	195.9	346.4	257.5	158.4	145.2	151.6	177.4	377.3	184.3	184.6	247.5	87	112	134	156.2	140	146.9	165.6
AADAC	4.8	10.5	2.1	6.2	5.7	6.8	8.9	13.8	4.3	13.4	6.9	15.3	6.3	9.7	7.2	9.4	6.6	6.9	10.6	23
AAGAB	55.35	64.15	29.7	68.95	55.25	47.25	58.05	28.9	37.8	59.8	52.4	49.7	32.3	44.05	41.85	33.3	36.5	33.7	61	44.2
AAK1	26.5	41.3	34.4	38.6	75.98	48.3	55.16	63.26	45.58	55.44	60.5	35.04	37.54	52.48	26.42	29.94	49.74	80.04	62.1	73.26
AAMDC	66.6667	81.3333	101.567	64.5	43.7667	66.1333	51.8333	62.6	73.7667	83.4333	63.5	59.8333	73.2667	70.6	66.4333	93.9333	58.5333	53.8333	83.7	86.5667
AAMP	169.8	251	187.6	204.7	235.2	116.7	174.7	140.3	225	276.4	139.3	136.3	237.1	131.1	167.7	136.6	184.9	188.4	190.5	213.6
AANAT	2.5	1.5	2	3.6	3.4	2.5	2.1	6	2.2	4.3	4.1	2.4	2.9	2.9	2.4	4.3	2.5	2.6	3.1	6.5
AAR2	196.4	222.3	234.4	203.6	242.8	161.1	246.4	261	239.9	250.4	225.9	227.5	214.8	250.7	205.6	223.6	246.2	259.3	234	245.3
AARS	522.9	496.9	566.6	571.7	524.8	345.6	832.5	537	458.4	650.7	610.8	516.1	561.8	660.2	569.1	545.3	524.9	505.9	451	546.7
AASDHPPT	239.9	258.55	230.9	176.4	196.15	294	212	130.45	253.3	183.85	158.35	231.55	213.3	182.3	206.4	199.8	176.2	226.4	204.4	154.2
AASS	54.35	107.7	37.9	57.75	97.6	78	58.45	56.95	81.5	79.95	22.35	6.7	26.45	28.15	23.2	19.15	8.8	13.05	38.95	45
AATF	209.7	246	270.6	274.4	283.4	190.2	265.3	256.3	351.5	173	200.9	146.4	131.9	194.2	132.6	247.8	223.4	194.5	184.6	193.4
AATK	63.8	34.9	122.9	76.1	108.5	85.7	146.2	117.3	79.2	88	92.2	78.4	48.7	53.4	41.2	71.2	50.3	72.3	102.3	111.1
ABAT	112.267	120.7	102.933	60.8333	35.5	42.3333	19.1	9.9	74.8	45	56.3333	43.3667	72.7	46.9	64.6667	63.6667	40.1	60.6	49.4333	60.7667
ABCA1	257.5	450.433	290	288.633	607	502.767	260.367	494.2	411.3	268.733	275.833	275.1	283.033	219.267	332.567	315.2	333.167	521.4	261	358.167
ABCA11P	58.8	25	27.5	8.4	50.4	53.2	48.6	36.5	46.5	38.2	26.7	37.9	40.8	17.2	30.2	38	49.3	25	39.6	68.8
ABCA12	2.1	17	31	2	6.8	10.5	21.3	19.9	2.4	15.8	21.5	18.8	11.5	3.6	17.7	2.2	1.9	5.6	9.3	21.8
ABCA2	17.1	28.9333	33.5667	30.6667	38	32.7667	25.9	47.7	45.7667	51.2667	47.2667	60.4333	42.4	42.2	38	55.9333	88.1	85.5667	65.2333	94.9667
ABCA3	12	41.8	48.1	45	19.1	11	26.4	7.3	25.6	47.8	48.4	74.3	64.4	54	42.9	21.4	91.6	25	93.6	76.9
ABCA4	12.6	9.3	15.1	10.9	25.4	12.3	22.6	28.1	13.8	21.6	25.9	23.8	12.4	12	10.5	9	9.6	13.3	13.5	14.1
ABCA5	87.9	109.9	176.3	122.9	71.3	148.3	97.1	100	126.7	135.7	100.4	73.6	68.9	53.8	62.7	29.7	78.4	74	72.2	63.8
ABCA6	167	146.5	153.7	45.8	77.1	94.6	28.3	72.6	160.9	104.3	40	63.2	116	88.6	43.3	54.7	41	107.4	80.8	89
ABCA7	33	42	62.3	82.5	59	50.6	50.8	86.4	71.3	77.6	65	59.4	78.5	53.4	69.3	73.8	94.4	54.8	62.1	85.8
ABCA8	658.5	471.8	705.2	127.7	310	807.2	159	285.9	463.6	236.2	144	284.4	475.7	388.1	477.9	341.8	270.4	180.7	399.8	349
ABCB1	80.3	40.8	75.4	61.2	59.5	89.4	31.7	73.8	36.5	62	64.5	36.9	51.9	56.9	29	58.8	70.1	19.6	53.3	64.7
ABCB11	16.8	19.3	15.8	4.95	6.05	8.85	9.45	11.7	5.9	6.75	13.4	18.3	12.8	8.5	7.4	16.1	5.35	5.05	8.05	9.5
ABCB4	6.8	1.8	16.9	7.7	3.8	9.3	4	9.5	1.9	17.7	2.8	8.3	23.8	22.2	4	7.8	18.1	4.9	2.3	14.7
ABCB6	27.25	23	69.45	50.1	24.7	34.1	50.45	38.6	54.1	84.8	62.8	34.7	61.6	60.35	54.6	45.25	55.25	61.95	66.45	88.75
ABCB7	64.6	77.6	109.7	67.1	52.1	70.3	32.2	77.2	90.6	36.5	71.4	69	39.8	47.1	78.6	96.7	66.6	29.5	54.8	61.7
ABCB8	2.7	2.4	6	4.8	3.1	2	3.7	4.6	3.4	4.5	10.8	3.4	2.5	4.1	4.4	5.5	6.5	3.6	3.2	3.3
ABCB9	18.65	6.2	8.55	9.95	10.9	7.7	9	8.6	9.05	17.9	7.15	17.75	2.8	9.8	16.75	23.7	14	4.6	5.4	7.75
ABCC1	169.7	169.45	169.7	170.15	211.9	175.25	189.55	165.5	174.65	169.15	206.75	141.75	214	214.6	126.05	157.9	142.55	138.2	169.6	153.25
ABCC10	174.6	114.1	122.35	107.25	93.65	108.15	114.2	101.55	134.6	117.1	213.75	155.45	221.1	142.35	132.3	129.3	142.8	158.75	156.65	158.85
ABCC2	27	26.3	10.5	4.3	20.1	10	17.2	12.7	7.5	13.7	19.7	27	55.4	4.3	7	47	7	6.9	12.8	9.5
ABCC3	19.15	10.25	60.55	54.4	34.35	23	17.65	16.95	84.95	16.75	163.25	244.6	211	40.2	187.85	105.6	156.7	230.55	156.5	93.7
ABCC4	29.5	22.2	35.9	44.8	31.2	28.4	82.5	25.4	16	35.4	35.8	41	34.2	38.8	18.7	66.5	32.9	33.7	48.6	49.4
ABCC5	240.9	242.4	279.9	184.4	233.5	190.2	189.9	204.1	196.9	238.2	312.8	312.5	367.8	271.6	230.8	207.4	249.7	332.2	263.1	299.9
ABCC8	5.4	3.1	10.35	8.25	5.15	3.2	8.3	10.95	6.1	8.4	13.55	5.1	7.4	9.45	6.75	7.45	6.5	5.45	6.55	7.35
ABCC9	43	29.5667	40.7333	26.4333	44.0333	29.4667	41.2	45.3667	29.3	35.3667	43.6333	35.1	20.9	43.1667	33.6	33.2333	29.5333	22.9333	36.5	47.5333
ABCD1	79.2	74.5	132.7	92.2	111.6	82.8	109.8	149.4	156	153.6	131	117.1	122	122.2	69.7	79.5	158.6	146.5	139	179.3
ABCD2	13.1	19.2	8.6	19.7	9.7	22.3	4.1	10.8	23.4	38.1	9.2	17.1	9.2	23.6	13.3	11	3.9	11.3	23.8	41.4
ABCD3	165.9	158.6	147.6	126	114.4	154.4	77.3	47.2	120.4	133.2	192.8	164.5	188.9	223.1	190.7	165.6	216.3	136.3	149.7	151.5
ABCD4	48.3	49.8	54.2	88.5	79.6	36.85	92.7	98.7	102.2	72.95	82.55	65.35	83.25	63.7	51.65	45.75	91.75	81.8	103.5	97.6
ABCE1	176.1	179.55	164.85	247.4	182.2	142.9	294.7	162.75	132.1	177.8	142	208.35	127.75	154.1	217.8	121.2	190.1	179.7	128.75	126
ABCF1	401.9	543.3	422.9	645.7	557.5	230.3	598.5	593.3	378.6	398.2	348.7	337.1	311.1	312	293.5	389.8	299.1	307.8	275	295.6
ABCF2	135.62	111.96	70.74	93.14	108.42	42.94	139.44	117.96	71.86	100.02	86.86	73.34	93.86	76.58	63.36	61.68	77.22	61.92	66.42	76.02
ABCF3	171.1	149	184.6	157.6	133.3	113.3	161.8	166.7	158.1	197.8	157.1	128.4	164.7	179.2	144.1	153.2	192.9	157.2	138.3	177.5
ABCG1	61.55	56.45	73.05	51.4	146.15	74.3	168.45	100.75	93.45	131	79.85	86.65	77	82.55	47.75	62.5	142.1	174.55	95.45	148.75
ABCG2	61.9	70.6	65.6	67.1	40.5	69.3	73.4	54.4	58.3	117.6	63.6	76.6	46.4	55.5	68.2	37	38	51.1	75.1	91.5
ABCG4	45.1	32.6	73.5	62.1	46.8	43.4	42.8	56.1	28.1	65.6	70.9	42.8	34.4	55.3	41.7	61.4	73.8	41.3	31.1	88.8
ABCG5	1.2	4.1	22.5	14.2	1.9	1.7	2.8	3.9	2.2	2.5	6.8	2.2	15	15.1	2.4	1.6	14.5	3.5	2.5	3
ABHD10	235.9	323.2	417.2	274.5	179.4	269.5	155.4	179.9	211.7	312.3	337.1	320.1	369.1	350.4	410.2	415.8	311.5	321.7	410.3	364.6
ABHD11	129.5	154.4	66.3	162.2	134	71.1	80	134.1	130.3	148.2	138.8	117.4	156.8	106	110.8	152.8	153.3	135.6	153.5	176.2
ABHD17A	231.3	451.7	302.4	445.8	456.6	142.4	473.3	425.6	415.5	364	544	455	464.5	476.7	391.2	517.3	443.5	483.2	471.1	530.4
ABHD17B	66	71.3	44.9	23.2	59.7	21.3	36.5	20.2	40.7	93.6	59.3	81.2	76.2	67.6	40.7	76.3	87.3	14.2	72.1	67.2
ABHD2	117.275	170.3	123.4	91.95	136.6	96.95	58.575	154.325	122	104.85	185.425	128.85	181.95	143.5	147.325	100.5	81.525	113.05	77.375	114.55
ABHD3	171.6	105.1	49.6	74.5	26.8	156.1	54.8	30.6	143.9	31.9	91.3	120.7	189.9	61	205	91.3	68.4	303.8	87.7	94.9
ABHD4	272.8	304.4	385.6	320.5	316.4	346.4	296.7	420.1	533.3	486.4	393.2	250.5	326.4	338.7	310.3	269.8	292.4	314.1	450.5	492.9
ABHD5	106.467	142.733	103.867	84.0667	97.8	95.6	62.1333	68.1333	69.6333	81.5667	52.8333	48.5333	49.9	55.7333	48.6667	37.3	34.6333	34.5667	49.1333	59
ABHD6	68.4	55.475	61.25	44.125	28.35	27.8	12.075	17.325	52.8	74.475	65.95	80.7	75.15	53	68.8	65.4	75.275	65.875	76.375	86.8
ABHD8	25.8	8.5	8.2	19.1	8.1	5.5	9.1	12	9.2	14.2	12.5	8.7	5.5	11	9.7	66.5	7.9	27.3	33.2	15.4
ABI1	361.6	258.8	217.5	240.7	268.9	341.8	153.65	146.35	281.05	244.95	153.95	308.25	174.25	179.15	327.2	270.15	286.8	354.95	286.7	196.4
ABI2	73.875	91.25	83.3	61.6	105.075	59.75	111.85	88.775	74.275	97.7	93.45	116.65	69.45	86.2	66.675	90.975	75.475	77.175	104.05	126.5
ABI3BP	42	36.7	84	93.3	23.6	41.4	38.5	56.7	30.2	81.2	126.7	93.6	56.2	67.4	72.6	12.7	4	41.9	73.6	154
ABL1	262.5	606.6	701	756	705.5	364.1	878.7	1110	1077	449.5	344.3	400.6	333.1	343.1	488.3	399.5	686.3	446.9	425.4	448.5
ABL2	102.5	116.8	111.2	76.3	202.8	108.7	110.7	342.5	77.1	112.3	63	89.8	59.9	58.3	63.1	81.4	72.3	87.9	71.8	99.2
ABLIM1	364.5	987.65	508.85	544.5	425.35	631.05	333.1	472.45	853.5	313.5	190.35	122.85	173.75	284.7	145.7	401.75	183.25	149.5	201.8	207.15
ABLIM3	43.9	73.4	75.7	146.9	91.1	59.4	82	89	65.3	75.6	85.1	34.4	37.5	75.6	54.5	62.5	45.1	41.8	74.3	22.2
ABO	17.35	13.9	47.7	5.55	18.05	18.85	28.3	11.5	18.45	27.6	32.05	18.5	22.3	10.25	12.45	16.2	7.9	5.6	14.1	23.65
ABR	134	303.6	228.55	233.55	271.55	169.55	99.45	356.55	277.2	197.5	452.3	484.05	338.95	280.55	267.75	304.8	344.05	219.85	343.6	285.15
ABT1	170.7	108.5	125.8	77.3	136.1	16.9	148.6	87.1	86.7	57.2	47.9	104	181	98	120	88.7	69.6	63.9	89.4	97.9
ABTB2	120	139	145.7	136.5	202.4	143.9	162.5	160.7	217	204	52.5	39	76.3	62.7	63.5	73.2	134.1	68.2	74.5	59.2
AC003989.4	22.7	9.6	21.4	9.7	42.9	35	45.9	58.7	35.7	53	22	21.9	5.4	6.5	29	23.7	28.6	25.5	13.8	19.6
AC004692.5	200.7	161	180	131.6	132	50.7	158.7	126.9	113.7	62.3	127.8	99.7	245.3	86	138.1	123.3	102.4	82.2	81.1	90.8
AC004941.5	41.1	16.2	24	45.3	7.7	53.1	6.5	16.7	6.4	33.3	37.1	21	21.1	30.5	44.4	26.1	9.6	13.4	43.6	8.1
AC005838.2	18	29.7	45.3	9.4	10.2	6.6	3.4	13.3	7.3	37.7	45.1	45.4	60.5	36.1	44.3	70.2	10.5	31.4	45.2	61
AC007292.3	7.6	18.5	68.6	66.1	52.7	23	18	80	32.3	45.2	38.1	31.3	3.6	35.7	6.2	30.1	3.3	25.1	17.4	17.2
AC007389.3	50.3	79	26	31.1	52.5	48.7	58.4	47.6	66.8	110.6	87.1	117.9	68.5	20.9	76.5	82.9	63.4	106.5	48.3	111.2
AC012065.7	26.4	18.7	16.9	29.4	31.6	40.7	39.3	17.3	20	39.7	49.1	27.8	35.9	37	35.3	14.3	35.7	14.1	35.2	63.9
AC068039.4	40.2	32.8	47.3	68.6	83.7	69.7	71.6	66.2	66.9	90.8	55.3	60.6	38.7	33.7	45.8	63.5	56.7	51.4	51.5	77.3
AC074212.6	1.9	1.6	6.1	3.7	2.7	2.5	4	4.9	2.5	6.9	4.2	2.6	2.8	7	2.5	3.5	4.5	2.9	3.8	4.3
AC084219.3	1.9	3.7	7	2.7	3.3	1.2	5.1	3.1	8.5	11.1	4.4	2.6	15.5	1.8	3	4.5	5.9	2.4	23.4	7.1
ACAA1	184.25	143.9	171.8	144.35	101.25	135.25	156.9	112.85	148.4	179.3	184.55	187.45	242.6	157.9	178.85	168.6	163.3	161.55	161.7	198.3
ACAA2	127.55	111.65	99.65	81.9	83.05	170.1	78.15	124.75	125.65	108.45	79.6	98	151.3	105.45	141.45	116.85	150.15	120.95	127.25	97.6
ACACA	55	81.7	21.5	72.05	21.5	13.35	22.5	22.05	11.6	45.1	50.85	32	69.95	53.35	37.2	20.15	14.75	13.75	16.2	21.3
ACACB	122.45	255.225	391.45	366.75	100.175	156.275	43.5	104.3	310.05	396.825	102.4	77.15	214.475	95.625	63.925	55.025	73.575	57.4	96.65	114.8
ACAD10	68.4	58.8	56.2	43.5	18.3	69.9	61.7	41.3	10.9	59.7	56.8	63.1	52.5	39.1	50.4	44.7	20.7	31.2	41	60.1
ACAD8	109.1	85.1	68.3	85.4	104.9	91.9	95.2	70	93.6	124.2	76	100.3	128.8	75.2	84	86.9	140.3	124.1	125.3	124
ACADL	14.45	14.7	36.3	31.5	20.15	106.8	10.4	29.05	32.65	46.15	6.45	7.45	13.55	7.45	8.8	12.55	3.75	1.95	3.5	19
ACADM	157	254.3	185.9	97	187.3	410.3	127	110.5	278	204.2	122.7	149.5	207.7	133.4	230.8	159.2	194.7	344.4	180.5	181.9
ACADS	45	87.9	58.7	56.4	63.6	86.2	54.4	60.6	83.3	70.2	78.1	60	89.8	101.1	59.7	76.7	82.1	65	98.1	95.9
ACADSB	17.7	16.4	24.9	17.8	11.8	17.5	0.9	8.8	15.3	20	28.8	11.1	13.2	26.1	17.5	23.5	2.4	5.1	3.5	31.1
ACADVL	573.4	569.1	687.6	700.6	520.8	290.7	512.5	586.2	855.7	632.9	785.4	600.7	970	534.7	607.8	709.3	689.1	596.7	866.4	855.2
ACAN	66.2333	68.5	70.4667	54	86.4	87.6	123.967	98.5333	78.4333	84.2667	244.633	64.7	89.4	130.1	65.2333	82.5667	116.9	76.1	66.2667	124.867
ACAP1	3.15	7.8	8.7	8.25	6.2	5.15	8	8.1	6.5	13.6	6.45	21.8	15.8	5.4	5.95	22.85	8.4	5.45	6.9	8.25
ACAP2	99.15	99.35	79.25	92.55	155.65	200.55	95.45	94.55	139.65	95.15	124.95	122.15	110.5	103.6	120.4	94.3	143	157.6	155.3	106.85
ACAT1	422.4	501.9	654.9	506.1	503.7	712.4	482.6	532	654.4	580.3	468.8	529.6	615.9	554.2	508	620.7	554.9	656.4	602.5	487.7
ACAT2	148.1	90.9	80.1	169.2	123.8	90.7	108	84.3	107.2	156.8	62.7	77.9	48.1	120.7	63	103.8	54.5	63.5	83.3	103.2
ACBD3	282.8	404.5	299.5	345.75	425.05	693.9	223.45	405.95	283.25	245.75	271.55	285.75	275.75	275.45	280.65	243.5	151.2	197.4	176.6	176.25
ACBD4	52.1	79.8	68.1	55.1	104.9	53.9	87.2	118.9	96.2	94.2	106.1	73.1	68.5	79.7	81.8	73.2	115	71.3	117.4	109.8
ACD	107.8	130	112.2	65	69.7	62.3	32.2	67	121.4	65.7	90.1	115	128.9	86.7	86.4	84.8	118.5	63.4	90.4	82.6
ACE	5.3	6.2	8.3	8.1	23.8	5.8	11.6	19.9	7.1	41.7	8.6	6.6	6.8	34.5	5.2	41.6	6.9	6.5	16.4	34.5
ACE2	24.45	19.2	29.9	20.2	21.55	33.95	24.3	20.4	24.35	28.4	4.6	28.1	7.85	12.95	17.1	19.2	30.25	14.45	14.9	46.55
ACHE	8.63333	4.3	12.5667	9.2	9.96667	9.5	12.5333	17.6667	8.5	9.93333	10.8	7.36667	5.06667	17.6667	9.2	8.86667	7.4	8.43333	7.13333	10.0333
ACIN1	138.3	111	151.8	89.9	110.4	43.3	122.8	100.4	90.5	109.4	120	71.8	118.3	100.4	93	102.6	131.2	103.4	119.7	55.8
ACKR1	324.6	240.8	640.9	1011.3	2771.4	618.3	5540.8	2187.1	1412.3	900.4	388.4	185.5	160.3	485.5	22.8	327.9	389.7	95	352	269.3
ACKR2	64.5	64.5	29.4	28	31.4	41.2	36.6	52.5	36.5	48.7	42.2	65.7	73.2	23.1	22.1	55.1	27.3	38.5	60.8	71.2
ACKR3	1730.5	3418.9	1986.2	1858.7	2412.4	3959.8	2786.9	2698.2	2729.4	1379.2	804.3	854.7	2023	1850	1112.2	1828.4	1332.8	1074.1	914.2	844.5
ACKR4	1.9	2.7	17.5	22	55	5.2	11.8	12.4	16.1	32.7	9.8	12.5	1	9.3	2.7	20.3	2.1	3.6	2.3	32.5
ACLY	263.4	245.167	266.8	494.333	289.8	289.833	316	261.9	268.967	600.033	265.1	272	249.467	318.433	224.2	240.333	318.3	200.9	235.7	191.767
ACN9	47.6	19.5	31.5	19.8	18.3	27.7	15.3	6.6	15.2	17.5	31.8	17	70.9	26.7	16.5	20.7	27.7	21.4	46.5	36.2
ACO1	334.7	331.2	360.1	395.5	400.6	294.2	615.5	272	339.7	544.4	381.7	404.4	574.7	370.5	487.9	399.4	522	461.1	408.5	498.7
ACO2	119.8	152.5	117.4	133.6	48	34.15	85.9	76	84.45	109.25	104.5	136.15	161.9	185.75	164.55	185.35	129.45	179.75	143.5	110.1
ACOT11	41.1	18.65	51.55	16.15	21.65	11.65	16.75	13.75	25.05	23.4	55.05	50.1	37.3	37.45	21.45	28.6	45.3	50.15	45.4	43.3
ACOT13	242.1	153	222.6	117.9	129.4	144.7	218.8	168	166.4	214.8	229.5	331.8	403.1	238.5	289.8	256.5	266.6	252.3	255.6	268.6
ACOT7	53.25	66.6	59.25	58.25	28.25	25.2	37.35	59.5	51.1	54.25	99.3	68.3	124.2	93.55	66.7	82.55	110.4	89.9	105.75	91.25
ACOT8	45.5	59.7	77.6	61.2	95.8	87.1	127.8	115	83.6	130.2	78.7	70.4	83.5	121.6	90.6	103.1	147.5	103.1	138.6	149.3
ACOT9	135.3	192.6	182.8	196.1	229.7	240.7	161.8	259.6	227.4	200.8	215.5	301.7	256.6	273.6	243.5	253.5	230.4	204.6	205.2	219.4
ACOX1	36.725	28.675	32.175	41.925	28.625	38.35	30.65	39.675	25.725	48.125	35.225	40.175	50.125	36.55	42.25	40.35	39.625	43.5	35.25	39.975
ACOX2	49.9	52.7	104.7	32.6	109.6	79.2	86.4	88.8	99.2	95.9	91.8	109.6	150.7	104	111.8	83.4	122.9	107.7	154.9	149
ACOX3	43.4	29.4	31.75	32.95	39.75	38.75	43.55	42.85	43.4	44.55	43.55	63.35	80.4	28	35.55	29.65	28.5	45.9	51.8	56.05
ACOXL	0.3	1.1	1.1	2.3	1	1.6	2.6	3.5	0.8	1.7	4.7	0.8	2.5	1.2	1.2	2.7	2	2.4	2.5	1.2
ACP1	274.033	214.133	185.4	186.633	211.267	176.333	213.4	143.8	195.1	193.767	200.467	221.8	311.767	246.733	261.167	207.633	232.1	208.433	198.433	165.433
ACP2	199.1	321.9	281.1	273.1	262.4	322.6	318.2	202	331.6	346.9	411.4	552	426.6	368.2	440.1	340.5	486.7	786.4	465.2	410.9
ACP5	217.3	503.7	263.6	410.5	219.8	105.4	161.6	141.7	1296.8	393.6	675.3	1141.3	744.8	319.2	715.5	280.5	960.1	1378.6	407.6	338
ACP6	146.6	100.1	156.9	135.1	106.2	86.2	90.4	146.9	173.8	188.9	118	88.7	186.9	55.3	105.3	130.4	93.6	127.3	198.1	203.3
ACPP	50.7	25.6	60.6	43.4	8.3	8.4	9.1	24.2	6.9	57.8	34.2	44.5	29.3	10.5	44.2	44.5	12.4	31.1	51.2	42.2
ACR	10.7	19.6	49.1	22.5	29.8	9.3	19	7.1	14.3	29.1	22.8	21.5	11	17.1	15.9	8.6	8.6	15.7	10.1	26.8
ACRV1	44.2667	67.3167	81.5833	70.3833	88.2	76.8333	99.5333	100.333	67.1	129.417	93.6167	72.7333	61.0333	57.2333	68.6667	72.2333	97.4	68.5833	79.1167	145.067
ACSBG1	19.4	19.1	24.95	24.65	22.4	22.4	34.8	21.85	19.5	36.55	17.2	15.45	17.65	23.85	14.25	26.2	41.35	24	16.4	39
ACSBG2	41.5	34.1	58.7	41.7	71.4	58.5	88.7	66.8	34	57.3	43.6	29.1	33.2	40.6	34.4	45.5	20.6	88.1	57.9	86
ACSF2	35.8	67.4	29.6	54.9	57.5	38.5	62.7	69.7	62.6	72	75	38.4	36	60.9	54.5	31.9	63.7	79.1	69.7	52.6
ACSL1	1361.45	511	423.9	802.85	388.15	215.8	456.6	166.7	500.8	977.9	206.05	255.35	760.2	377.4	463.55	290.65	337.85	307.35	194.2	224.4
ACSL3	189.367	186.9	162	218.067	185.4	225.367	184.067	130.933	135.6	199.433	214.733	214.933	164	174.167	188.533	163.4	183.367	278.4	267.967	215.8
ACSL4	136	111.1	95.2	119.1	124.4	210.6	324.2	138.7	180.6	94.6	127.8	81.8	125.7	53.8	74.4	121.8	110.1	149.2	78.3	86.7
ACSL5	95.7	77.6	94.6	128.3	110.3	94.9	162	109.7	100.3	165.6	76.5	115	61.2	140.1	147.8	128.2	122.4	110.1	112.6	143.2
ACSL6	28.8667	34.2667	61.9	40.2667	34.7333	45.3	48	37.8667	42.6667	49.5	48.1667	45.5	39.4667	26.7333	31.3	41.7333	43.9667	32.4	43.2	79.6
ACSM1	2.8	2.7	9.3	4.2	3	3.3	6.9	18.7	4.3	4.2	4.7	2.2	2.4	1.5	1.5	2.2	14.4	11.5	1	9.7
ACSM3	29.35	24.35	24.05	33.55	9.85	20.3	8.1	14	12.4	37.3	47.95	24.65	29.7	23.75	27.2	35.55	36.45	15.9	29.75	48.35
ACSM5	110.3	108.75	256.2	148.5	127.9	289.35	100.2	81.05	252.9	119.9	105.15	125.55	154.9	102.45	155.1	162.45	128.2	173.3	117.45	146.65
ACSS3	90	110.4	89.7	73.5	152.4	138.7	139.9	130	89.8	153.1	100.5	113.3	110.8	102	116.1	86.5	109.1	105	106.6	136.9
ACTA1	4.3	2	2.1	6.5	17.6	19.6	35	5.3	21.9	31.6	6	9.2	19.4	4.7	21.3	8	6.6	6.3	27.8	26.2
ACTA2	709.9	613.1	793.35	708.9	901.15	1408.55	643.75	1210.3	924.95	921.25	785.55	318.4	323.55	1303.2	516.3	605	567.5	444.3	652.25	770.6
ACTB	5973.16	5104.08	6313.48	6540.24	5001.66	5217.06	6847.14	6715.46	4819.96	4516.28	6374.52	7305.5	7058.54	8456.9	6931.4	8266.64	7983.36	5738.72	4686.44	6540.02
ACTC1	104.3	299.3	237.7	98.7	61	127.3	51.7	156	98.3	177.3	46.1	47.5	127.8	98.5	86	62.5	89.1	75.1	86.3	122.8
ACTG2	67	155.1	111.5	97.3	81	221.4	83.1	188.2	136.8	219	73.9	75.2	99.8	123.9	86.7	56.9	83.9	86.2	121.4	96.2
ACTL6A	180.4	73.9	68.8	91.5	105.4	132.4	132.2	88.8	112.8	113	122.1	70.4	234.8	83.9	94.9	75.5	101.1	138.5	102.1	78.6
ACTL6B	2	2.1	4.6	3.55	3.15	2.15	3.6	4.45	1.9	5.2	5.7	2.7	2.7	3.55	5.1	3.35	3.5	3.25	3.25	4.25
ACTL7A	5.6	6	21.4	7.1	5.6	7.6	8.2	10.8	4.3	9.6	6.4	6	3.9	12	7.2	6.8	7.6	6.1	5.5	7.1
ACTL7B	8.7	20.2	18.2	5.3	6.4	5.6	5.3	12.4	6.1	7	10.7	5.2	6.7	4.8	6.3	9.7	13.1	6.8	17.8	15.9
ACTL8	10.8	7.5	14.7	6.8	9.7	10.1	12.2	12.4	19.9	10.7	8.1	14.5	12.9	6.9	10	8.9	13.6	13.7	14	11.5
ACTN1	169.333	157.3	250.2	313.567	563.733	368.267	862	833.967	461.467	476.7	506.767	273.767	209.333	327.933	160.067	211.367	337.233	294.7	326.433	322.5
ACTN2	23.125	20.8	35.675	27.575	22.1	25.825	25.55	28.125	17.9	35.425	25.3	18.85	22.775	24.175	20.275	26.525	29.175	22.05	21.575	35.475
ACTN3	45.8	33.5	63.9	35.5	53.2	40.8	66.3	69.8	41	73.3	29.6	51.5	53.9	48.1	61.2	43.3	64.7	41.3	44.9	80.2
ACTN4	195.1	294.3	476.6	321.1	1363.8	300.7	453.2	712.3	362.2	793.9	706.2	641.1	695.1	515.9	353.8	338.5	824.5	408.4	487.5	487.8
ACTR10	670.3	510.4	568.9	554.2	425.3	902.9	501.6	573.8	712.7	500.1	620.2	800.6	542.3	747.8	687.1	723.7	591.7	726.9	624.4	483.5
ACTR1A	215	209.85	196.85	198.3	258.05	165.9	231.75	164.5	198.25	247.25	236.5	248.3	292.8	214.45	214.2	262.6	216.15	218.45	273.3	241.5
ACTR1B	133.4	203.2	266.6	143	262.9	166.9	281.6	270.1	292.2	335.3	274.2	252.4	185.1	244.2	215.9	233.6	293.6	270.5	278	321
ACTR2	368.467	487.4	493.9	532.633	415.633	368.9	446.167	223.8	355.533	483.433	499.9	781.5	311.5	614.167	861.8	672.067	512.1	655.333	487.867	446.967
ACTR3	1078.53	717.7	734.933	833.733	640.267	1013.87	1124.97	724.833	762.2	826.467	833.533	1191.8	1099.53	948.233	1063.23	1053.63	1068.13	1468.33	1038.23	701.1
ACTR3B	40.3	41.3	30.7	21.2	14.6	24.7	29.2	38.4	19.8	38	20.1	36.8	47.9	23.3	34	31.9	31.6	28.4	36.1	65.3
ACTR5	77.15	66.75	71.3	89.8	95.05	62.9	102.25	68.65	85.25	111.45	42.9	71.5	96.75	68.65	53.6	49.55	100.25	93.4	74.3	85.55
ACTR6	61.7	133.1	92.3	54.3	55.8	118	60.7	53.3	94.4	65.7	75.3	92.9	65.8	67.8	80.2	54.8	88.7	62.9	90.6	46.2
ACTR8	79.6	66.2	71.3	71.6	48.8	46.6	46.7	21	55.2	117.6	117.3	86.4	105.3	72.5	79.3	84.3	56.4	57.3	85.4	122.8
ACVR1	364.2	508.1	512.4	444.5	713.3	645.6	287.3	401.2	460.6	289.9	479.2	502.8	377.3	419.2	450.6	490.6	429.1	451.5	462.4	286.8
ACVR1B	113	99.7833	144.517	116.617	104.683	90.75	99.2	110.15	95.2167	106.683	73.8	77.45	72.4333	78	85.1167	71.7167	52.8	57.4167	64.2167	119.65
ACVR2A	125.1	109.4	163.7	92.9	132.1	143.9	78.2	145.4	132.3	239.4	147.6	64.4	77.6	172.7	125.9	63.6	101.1	125	127.7	226.8
ACVR2B	88.3	22.4	145.2	91.2	148.7	100.7	116.3	138.6	101.2	191.8	105	113.5	85.1	89	75.6	72.2	159.3	120	64.4	115
ACVR2B-AS1	27.8	57.1	13.7	29.4	58	126.1	84.2	65.6	57.5	81	50.3	47.4	62.1	41.8	10.6	61.6	54.1	64.1	45.9	71.9
ACVRL1	83	62.2	135.8	89.2	15.3	48	46.2	23.2	108.8	88.2	88.7	60.9	49.3	70.9	76.1	42	40.7	31.4	31.8	92.2
ACYP1	162.5	200.5	73.5	119.8	57.6	148.1	68	62.2	117.2	123.2	25.4	48	73.7	66	51.9	35.5	74.5	56.6	85.6	81.8
ADA	57.55	244.95	95.6	127.15	105	126.9	124.7	104.5	114.75	186.9	89.65	75.85	59.15	66.25	64.3	105	62.6	65.1	92.05	111.6
ADAM10	282.367	160.4	241.8	173.567	216.7	307.8	229.133	256.9	208.667	154	209.367	359.667	357.733	258.933	378.033	240.667	331.7	289.367	398.4	263.067
ADAM11	6.8	5.7	7.2	5.6	11.2	14.1	14.2	36.4	9.1	20.7	9.3	13.5	11.7	14.4	10	7.2	12	14.2	12.8	21.5
ADAM12	35.35	28.075	39.125	38.2	29.9	23.625	38.8	29.75	23.9	42.375	83.275	23.75	49.025	50.25	47.175	33.75	36.8	26.45	46.2	32.8
ADAM15	28.7	43.6	36.7	38.3	82.2	7.3	62.2	33	88.7	83	82.4	81.8	33.7	103.5	62.8	76.1	10.1	48	119.7	31.2
ADAM17	126.133	83.6667	117.067	149.067	184.767	164.533	125.7	215.4	126.567	119	142.667	107.867	78.8	97.4333	112.8	89.0333	122.633	110.033	121.9	118.2
ADAM18	33.1	11.8	27.6	36.3	35.5	18.1	21.3	26.3	16.7	53.9	55.6	31.4	36.8	5.5	32	4	29.6	28.6	39.5	66.6
ADAM19	46.25	62.5	47	50.75	76.95	50.25	92.1	105.1	29.65	80.95	73	66.95	49.55	82	61.9	76.85	58.7	41.35	53.9	97.45
ADAM2	1.1	1.2	2.1	1	1.9	1.7	3.4	2.3	1.5	4.1	2.6	6.5	0.9	1.8	1.6	13.1	2.3	1	2.1	11.8
ADAM20	6.85	33.9	21.7	28.05	33.4	13.6	28.2	21	22.65	29.55	45.7	10.4	40	20.05	39.1	32.15	21.85	8.8	29.2	44.4
ADAM21	29.7	49.4	72.4	58.2	55.9	60.5	80.5	75.9	57.1	130.3	62.4	85.3	64.6	61.1	78.9	58.2	92.3	92.9	88	155.7
ADAM22	21.7667	22.15	36.2833	22.2667	13.1	21.95	18.6333	14.45	9.71667	30.6833	28.35	24.4333	26.85	37.35	33.5167	31.5	18.5833	13.9	30.4	42.5167
ADAM23	29.65	38.3	19.15	37.2	40.85	57.6	41.45	60.9	33.95	63.25	60.65	68.95	39.8	77.3	27.55	46.25	41.35	35.9	62	65.25
ADAM28	7.2	5.53333	16.9667	24.3667	14.9	4.8	11.1667	15	6.96667	20.8333	19.8333	42.4333	12.5333	19.6667	30.1667	19.9333	18.4667	16.4333	20.5667	18.2667
ADAM30	27.8	41	16.8	48.9	22.8	36	51.2	10.1	17.7	53.7	18.2	29.3	11.2	27.4	11.5	51.5	12	36.9	35.2	69.5
ADAM3A	1.7	6.8	3.7	14.6	1.1	2	2.3	3.9	3.1	11.9	19.7	1.1	13.2	14	16	3.6	1.9	2	2.7	2.3
ADAM5	19.25	37.85	45.45	37.45	69.85	55.3	65.55	60.55	42.75	74.95	68.75	28.85	11.6	14.95	40.35	39.65	42.05	51.05	50.65	88.1
ADAM7	12.85	8.4	16.8	6.2	3.2	3.55	7.45	5.75	4.4	12.15	11.5	16.8	6.9	11.6	4.5	6.4	2.9	1.35	11.45	6.45
ADAM8	15.4	6.6	21	28.2	18.3	7.95	9.35	31.15	17.75	15.55	30.75	21.2	20.95	6.4	15.95	25.3	27.05	12.05	8.25	10.15
ADAM9	807.2	483.7	326.8	471.1	452.6	602.6	350.2	236.9	605.7	338.9	414.3	732.3	898.5	717.6	1025.3	873.6	792.5	742.5	571.2	557.7
ADAMDEC1	23.4	17.7	25	29.3	22.5	28.8	19.3	16.8	26.6	68.6	34.4	40	18.5	20.9	28.6	28.7	71.4	37.6	37.4	50.1
ADAMTS1	830.9	853.9	900.2	1043.4	1053.1	1389.4	1294.7	1809.7	704	870.4	361.2	396.8	185.7	373.1	454.5	133.7	361.7	260.4	326.4	341.2
ADAMTS12	86.4	68.7	64.5	57.4	87.3	82.3	54.7	101.1	54.4	89.8	54.8	76	118.1	53.6	71	57.5	73	61.6	66.8	97.8
ADAMTS13	38.8	45	58.3	45.1	43.7	16.9	38.9	42.9	38.1	45.2	34.8	71.4	71.8	16.6	56.7	20.6	64.7	58.3	46.7	67.2
ADAMTS2	54.05	101.2	111.7	66.9	82.2	115.2	142.75	185.8	195.1	105.7	94.95	139.7	89.35	124.2	82.9	117.8	112.3	112	107.3	136.8
ADAMTS20	16.5	5.2	23.8	38.2	5.2	19.4	12.5	16.5	17.6	24.8	22.3	28.3	21.9	21.3	18	4	30.9	12.6	15.7	28.7
ADAMTS3	46	23.2	35.6	37	57.8	31.3	38.8	37.6	20.2	40.4	130.2	107.4	45.6	92.3	44	37.1	65.4	49.3	123.6	65.4
ADAMTS5	842.7	2634.9	1925.9	689.6	1480.6	2821	310.9	568.3	1942.5	836.6	217.4	198.7	347.6	368.8	316.5	247.6	516.6	404.7	386.2	503.8
ADAMTS6	16.1	16	50.3	10.7	45.4	43.6	32.8	26.5	32.9	69.4	57.4	46	38.2	37.2	9.6	64.5	48.2	47.3	50.4	104.2
ADAMTS7	27	31.65	46.85	27.45	15.95	19.8	25.1	22.95	6.3	61.75	44.3	29.65	24.4	5.05	42.7	41	42.05	26.55	38.6	75.3
ADAMTS8	5.7	9.85	19.1	13.1	13.9	8.55	18.3	17.8	7.6	14.75	30.1	15.8	10.95	8.75	8.7	27.15	14.5	5.6	12	18.35
ADAMTS9	72.7	80.3	122.5	203.4	225.1	120.4	207.2	743.6	82.6	125.1	96.6	53.8	73.6	78.5	63.7	78.2	107.1	83.4	86.4	139.3
ADAMTSL2	1.5	2	3.2	3.7	1.9	1.8	2.4	3.7	3.1	3.5	5	4.4	3.7	3.8	4.8	3.5	9.1	3.4	3.3	3.5
ADAMTSL3	130.5	118.1	177.5	124	190	205.2	83	114.7	119	191.9	248.3	331.2	237.9	251.4	353.2	329.7	288	260	425.6	352.3
ADAMTSL4	69	78.6	64	101.4	96.3	85.5	96.6	144	84.5	91	110.5	48.3	32.1	93.4	52.4	98.3	61.3	52.5	101.3	170
ADAP1	112.6	141.45	109	96	129.45	89.9	151.15	120.35	151.1	174.85	111.1	91.55	249.3	72.9	88.2	120.05	132.35	164.75	137.7	169.6
ADAP2	297.6	306.5	197.6	237.9	126.6	289.2	134.8	149.6	178.7	211.2	513.4	448.6	811.6	355.3	491.7	348.9	393.7	599.1	387.2	456.2
ADAR	680	582.9	688.7	931.3	719.4	455.2	605.6	622.7	569.4	528.2	779.5	695.5	729.2	821.3	720.5	747.6	658.6	630.5	693.9	728.7
ADARB1	60.2333	39.9333	73.9	74.6667	105.6	86.6333	76.3	65.4	94.2	78.5667	91.4333	47.9667	63.0667	74.0667	56.3667	55.5	48.1333	63.4	74.8	86.8
ADARB2	3	10.4	35.9	6.7	14.5	3.7	6.3	9.5	23.6	16.8	14.2	10.7	7.6	4.1	7.1	18.1	11.4	4.8	8	7.1
ADAT1	118.7	98	97.3	53.1	85.3	83	83.6	86.2	82.4	113.5	131.6	112.8	94.6	80.1	69.3	48.8	89.9	115.8	75.4	105.1
ADCK2	52.2	50.175	53.975	45.775	55.95	38.8	42.95	67.2	74.525	53.175	86.65	75.875	105.675	72.55	64.8	76.175	75.55	81	76	77.05
ADCK3	170.8	207.6	261.4	189.5	338.4	224.9	212.4	144.5	313.4	207.1	119.7	179.1	234.4	123.7	135.3	109.3	194.7	157.5	200.6	178.7
ADCK4	25.8	19.7	7.5	5	7.3	4.6	5.3	7.5	4.2	8.7	8.6	6.5	4.6	9.4	19.9	40.2	8.5	5.6	3.9	28.1
ADCY1	41.2333	24.7333	39.2333	30.1333	57.1667	37.3333	47.8	52.6333	45.5333	56.5	111.567	104.467	40.4	61.5667	39.2333	31.2667	66.5667	66.5333	83.1333	61.0667
ADCY10	11.45	10.65	11.2	14.2	10.95	17.35	7.65	22.25	11.5	34.7	38.8	13.95	20.6	13.8	12	23.55	13.5	17.05	19.65	20.5
ADCY2	97.1667	238.2	129.2	128.367	88.1	111	53.3333	75.8	164.367	93.2333	35.7333	21	29.2667	19.9667	31.3333	39.3667	43.9667	27.2	39.0333	46.6
ADCY3	190.6	179.35	174.45	228.35	302.65	132.55	280.65	221.35	255.05	232.6	162.7	150.15	192.55	168.9	97.15	146.25	125.5	184.4	115.25	190.75
ADCY6	105.4	129.9	208	199.4	222.2	150.3	166.9	283.4	250.1	268.6	172.5	172.8	172.8	198.3	172.4	172.4	276.7	256.4	297.1	323.7
ADCY7	104.8	81	78.2	87.7	58.3	183.3	44.8	23.3	117.1	93	153.4	144.3	239.3	163.2	173	220.8	213.5	232.1	170.2	127.2
ADCY8	16.7	20.9	46.8	23.6	3.6	4.2	5.7	17.4	2.5	19.8	63.1	28.2	19.5	5.9	39.2	10.9	19.7	13.7	16.4	46.4
ADCY9	74.6	75.4667	74.3667	97.1	88.9667	86.1333	42.7333	106.967	101.4	95.2	106.067	107.767	117.9	118.967	90.6333	104.9	117.833	76.0333	116	102.133
ADCYAP1	56.5	56.3	58.1	70.7	54.7	44.7	53.3	63.1	39.6	91.4	84.6	68.5	54.4	52.9	79	82.4	118.8	57	79	108.5
ADCYAP1R1	21.1	29.1	17.1	20	33.7	7.3	15.1	7.3	8.3	44.3	10.4	6.7	35.7	37.3	10.6	14.8	6.6	13.1	24.7	67.1
ADD1	203.233	285.533	324.433	264.6	289.933	212.2	248.167	276.333	322.6	363.167	345.433	348.7	374.2	340.933	259.133	361.533	314.133	299.4	314.8	380.033
ADD2	14.5	35.8	24.7667	32.9333	44.0667	41.2667	74.0667	58.9333	39.8333	64.9	45.3	41.7	30.5667	6.23333	30.5333	9.83333	50.1333	45.8333	40.5	54.9333
ADD3	505.225	477.575	1076.85	544.475	454.15	1157.17	270.675	549.425	660.65	563.175	944.875	778.6	681.925	1143.25	1155.65	1052.5	762.525	790.55	1041.17	872.675
ADD3-AS1	3.9	5.15	10.4	3.6	9.1	5.7	7.75	8.55	5.85	14.15	16.6	18	20.15	8.05	5.35	26.55	8.45	16.55	5.95	32.05
ADGB	1.6	12.5	5.1	2.4	9.5	16.8	9.9	3.6	3.4	4.2	5.2	12.4	12.6	18.6	17.8	9.6	25.2	2	11	24.1
ADH1A	10.3	50.1	43	28.5	54	60.5	64.6	50	47.8	64.8	18.4	18.6	32.5	26.5	35.8	28.4	41.1	25.8	26.6	48
ADH1B	152.733	243.7	816.567	152.3	541.2	751.767	418.7	321.433	622.6	408.467	21.6	45.8333	199.4	129.9	74.6	95.3667	65.1	28.5333	30.1333	56.7667
ADH1C	131.8	67.3	218.2	22.9	76.9	169.8	32.3	100.7	120.7	92.3	29	28	172.9	40.2	31.2	62.6	3.3	3.2	8.1	36.8
ADH5	967.35	722.8	913.2	562.35	384.1	772.2	345.6	389.75	654.5	434.95	322.35	369.15	215.7	382.75	390	397.3	289.25	269.4	325.35	375.15
ADH6	28.4	35.75	25.9	9.9	39.75	20.55	7.3	12.5	25.7	20.8	49.95	40.75	17.5	7.75	16.8	43.25	9.45	28.2	12.55	37.5
ADH7	42.5	28.8	63.9	37.8	43.7	36.8	18.3	57.2	25.4	52.8	89.5	47.5	43.2	36.9	40.3	25.7	8.6	45.8	43.4	54.9
ADI1	332	572	434.4	259.8	353.3	782.1	86.8	217.1	517.7	595.7	368.5	481.7	805.8	399.5	429.4	374.6	487.7	597.2	412.1	423.5
ADIPOQ	272.8	468.8	136.4	236.5	333.2	61.5	148.8	91.1	211.1	651.6	98.9	173.4	827.5	525.9	486.4	646.6	171.8	20.9	111.2	224.3
ADIPOR1	333.2	427.2	316.5	360.2	429.2	320.8	361.8	360	503.5	458.5	248.9	362.8	387.6	266.6	443.9	416.4	430	544.6	492.4	324.6
ADIPOR2	439.9	504.6	367.1	443.2	438.7	336.4	390.7	257.2	413.2	462.2	387	354.9	159.2	418.9	395.9	418.8	332.2	337.3	347.6	397.4
ADIRF	165	217.7	432.7	432.5	530.3	213.7	333.2	804.8	541.5	564.4	340.2	202.4	1080	832.9	354.4	570.9	715.9	286.6	715.8	576.6
ADK	247.9	114.95	148.95	119.7	110.95	152.8	135.1	134.05	92.35	108.35	178.4	189.4	226.85	167.85	173.15	171.7	154.3	193.25	143.45	104.9
ADM	1758.8	804.4	1773.5	1511.3	2952.9	2698.6	7982.3	4779	1826.4	1461.2	450.6	207	673.3	469	294.4	131.4	168.6	282.9	271.3	540.7
ADM2	34.4	40.8	25.6	58.5	32.4	28.3	25	52.3	42.6	19.9	90.3	28.8	45.4	83.1	32.7	35.4	45.4	14.9	16.1	21.2
ADNP	330.7	295	426.8	289.7	307.5	296.4	190	204.9	328.9	274.8	328.7	311.1	260.7	433.8	345.6	323.3	318.8	292.7	383.6	303
ADNP2	97.8	218.45	148	300	220.6	187.45	82.85	245.4	172.05	154.35	138.95	105.9	120	139.75	111.85	67.1	113.9	79.1	110.15	98.35
ADO	116.55	153.55	104.7	118.5	132.9	148.65	165.3	71	131.05	164.3	171.2	169.05	153.7	125.2	179.85	184.85	188.95	150.95	186.75	181.7
ADORA1	36.4	45.8	81.3	64.85	84.05	63.4	63.15	83.3	74.85	71.8	86.65	65.9	59.6	61.25	72.2	40.9	107.75	68.3	72.55	119.4
ADORA2B	63.7	59	92.4	65.5	91.2	112.3	112	111.9	107.7	106.7	91.6	91.3	70.1	94.7	101.2	102.4	83.5	129.4	102	133.3
ADORA3	343.8	328.9	278.6	187.9	101.3	215.5	158.3	111.7	268.4	213.6	272.6	439.5	184	162.1	513.5	197.8	442.9	575.9	452.4	321.4
ADPGK	828.7	579.8	404.9	476	431.8	498.4	373.7	358.4	436.1	347.1	466.8	481.9	548.7	446	392.1	406.1	366.4	553.8	470.5	406.5
ADPRH	12.5	12.6	15.7	7.4	16.4	15.8	19.8	23.4	13.4	20.2	16.1	17.7	11.5	21.8	14.7	10.9	18.4	17.7	15.8	23.7
ADPRM	74.9	74	58.3	12.3	25.7	20.4	8.6	6.5	50.9	61.1	17.1	56.8	4.4	15.9	51.5	39	11.4	28.4	63.1	47.2
ADRA1A	10.85	17.05	18.725	22.575	17.75	13.15	15.3	9.45	15.625	21.45	34.45	13.15	21.15	14.2	16.375	24.425	13.975	13.9	21.3	29.825
ADRA1B	13.3	10.1	12.6	13.8	13	5.2	6.6	5.1	8.6	5.6	14.9	16.9	18.6	7.3	3.7	12.3	7.6	20.3	8.6	12.3
ADRA1D	10.95	13.05	25.55	19.15	11.4	9.25	14.05	10.05	16.55	22.75	24.75	15.55	17.75	5.4	19.8	5.7	25.65	13.6	9.5	15.2
ADRA2A	62	75.2	137.7	126.9	203.7	494.3	216.5	557.3	190.4	248.7	157	72	87.5	220.8	47.9	84.4	60.1	72.8	152.6	117.8
ADRA2B	43.8	50.5	64.8	42.1	14.4	9.1	33.6	83.8	21.9	59.1	74.1	40.7	44.8	40.5	12	56.2	59.2	46.7	58.3	66.6
ADRA2C	7.2	28.4	60.1	27.4	34.3	10.5	25.7	68	32.6	28	25.4	6.6	23.5	53.4	10.6	19.2	32	12.7	32.2	43
ADRB1	2	8.4	5.2	32.9	2.7	4.6	4.5	5	3.6	6.8	16.5	2	13.3	7.4	4.1	5.5	2.4	2.6	3.7	4.7
ADRB2	99.9	169.9	187.7	116	142.5	288.6	163.2	97.2	115.8	133.7	141.4	168.6	111	166.8	229.6	112.4	92.7	102.7	125.9	175.4
ADRB3	11.7	9	13.9	13.2	5.05	4.75	6.55	8.95	4	9.85	31.8	7	7.15	11.65	5.15	18.9	5.8	4.45	6.35	17.9
ADRBK1	71.1333	99.6667	105.133	111.167	166.033	129.133	183.967	149.933	130.1	182.967	99.7	149.067	101.667	104.667	115.267	148.267	126.5	121.233	104.933	160.3
ADRBK2	47.55	44.05	66	39.2	61.7	40.5	45.15	52.35	46.6	80.6	62.15	57.3	50.2	40.8	52.15	32.75	37.8	56.1	59.4	70.5
ADRM1	218	279.2	249.3	342.7	334.3	181.3	481.1	341.8	291.6	293.6	274.2	303	285.6	286.5	266.2	298.8	325.8	323.1	277.4	275.1
ADSL	264.6	237.45	224	242.05	199.35	233.4	307.25	179.8	238.7	246.8	228	249.7	197.35	310.2	208.15	249.9	275.15	251.3	313.8	251.3
ADSS	187.1	290.8	293.2	193.8	197.1	233.7	175.7	123.7	215.2	218.8	147.6	203.5	195.2	197	180.3	192	226	224.5	209.6	201.3
ADTRP	65.1	99.8	114.9	82.8	129.3	99.8	118.2	131	82.5	146.1	118.5	130.2	130.6	98.7	83.9	114.7	111.7	119.4	121	185
AEBP1	248.9	259.7	278.5	197.8	774.9	158.8	824.8	1071.2	606.3	352.8	1491.2	254.1	294.5	1107.1	423.7	480.7	1021.1	401.6	478.7	486.2
AEN	50.9	46.5	42.1	69.8	24.4	21.6	43.3	79.3	12.3	23.5	65.7	37.4	48	40.5	40.6	11.6	37.6	13.7	35.2	43.2
AES	118.8	192.3	198.3	168.1	163.3	105.4	234.2	144.8	324.3	118	193.9	152	206.3	184.3	179.9	206.2	243.8	147.7	113	208.7
AF007147	37.3	19.4	91.8	98	133.5	108.6	83.8	80.8	125	111.1	16.4	63.1	32.1	17.9	26.7	19.1	19.2	20.9	20.4	29.4
AF070581	5.4	6.2	13.4	9.3	0.6	2.4	5.8	19	1	7	25.6	5.7	9.1	14.2	9.5	9.6	2.3	1.9	11.2	6.1
AF090939	20.6	58.8	48.8	69.2	18.6	11.4	14.1	52.6	13.6	36.8	54.3	34.1	13	4.9	13.5	29.1	10.5	5.1	10.9	13.8
AF198444	13.3	11.3	10	46.3	1.3	7.4	3.9	22.3	1.1	3.9	31.8	8.1	38.2	6.8	16.5	6.2	1.5	24.6	11.6	20.5
AFAP1	7.8	4.1	7.8	15.6	21.7	23.7	22.3	20.5	18.3	8.4	34.9	10.3	11.5	11.9	9.8	10.6	20.9	13.9	15.6	14.9
AFF1	860	1019.2	932.3	548.933	380.1	658.733	199.5	310.567	539.167	566.767	427.2	204.633	291.4	303.767	267.9	358.9	304.633	298.533	263.4	234.067
AFF2	34.0333	22.8333	16.0333	31.7333	28.3	39.5667	42.3667	44.7333	30.1	37.9	29.1333	34.6667	23.8	23.2333	24	34.4333	26	17.3667	26.5333	39.6
AFF3	1.4	6.3	4.35	2.8	3.1	3.55	3.8	3.95	4.75	3.7	4.25	4.15	3.65	3.7	4.6	4.25	4.05	2.15	2.7	3.8
AFF4	45.9	53.5	58.5	50.6	44.8	51.5	47.7	53.9	20.1	84.1	8	53	37.9	59.8	33.9	39.8	26.2	42.8	26.9	55
AFG3L2	179.2	162.8	137.4	128.8	117.2	105.2	105.2	135.6	120.8	203.3	175.3	117.2	222	101	111.7	110.2	79.1	104.5	118.9	157.4
AFM	21.2	36.5	9.5	6.8	32.8	33.9	45	31.7	30.4	52.8	36.6	19.3	22	25.2	16.8	26	39.9	45.5	51.5	66.3
AFP	24.7	25.3	27.6	7	9.6	5.9	19.9	5.7	11.3	12.9	29.3	26.1	6.9	6.3	6.5	13.4	21.1	10.4	21.5	7.7
AFTPH	272.3	500.4	459	297.4	590.8	524.9	712.3	777.6	446.2	523.3	374	458.4	364.1	394.1	355.6	485.5	492	611.1	583.4	528
AGA	108.8	65.2333	79.5333	64.1667	55.8333	56.9333	64.2667	52.2667	66.8333	97.6667	93.2333	144.2	175.567	100.2	108.1	100.767	97.1333	99.6	114.4	85.5333
AGAP1	42.4	61.9	85.2	107.7	136.1	162.4	33.6	118.4	111.4	121.1	78.3	54.7	70.5	117.5	52.9	74.4	63.5	55.1	73	112.1
AGAP2	15.6	16.05	19.75	7.9	22.55	27	33.2	16.7	16.55	31.45	21	29.9	11.15	22.35	28.5	26.95	40.1	14.55	31.75	34.55
AGBL2	15.3	16	27.4	22.9	11.8	12.8	23.7	21.6	20.8	37.5	49	34.8	27	29.4	30	24.8	24	26.1	24.2	55.9
AGBL3	0.6	0.8	0.7	4.4	0.2	0.5	0.5	1.4	0.8	3	6.5	1.3	8.1	0.7	6.1	1.8	0.4	0.2	3.9	0.2
AGBL5	22.5	17	12	37.7	14.3	9.2	10.1	14.3	19.1	16.3	22.8	6.4	42.7	17.7	51.2	24.2	73.2	13	53.3	26.1
AGER	11.4	14.2	44.05	14.85	30.15	21.5	21	27.7	20	24.3	18.9	18.8	19.3	14.3	15.85	25.6	35.55	17.7	17.95	24.45
AGFG1	309.775	179.275	104.15	258.1	216.3	187.2	223.075	227.325	168.275	171.525	86.95	111.9	137.45	77.725	120.2	103.9	110.85	148.725	120.175	137.075
AGFG2	32.48	30.66	35.34	44.3	32.88	29.98	31.46	40.62	38.22	41.6	52.92	39.8	42.5	35.38	38.04	32.32	30.38	31.96	32.34	45.96
AGGF1	87.5667	74.4667	90.1	60.4333	66.9333	92.1333	64.3	27.6667	84.0667	103.5	76.1	95.5	93.0333	95.8667	101.633	82.6	76.6	79.1333	80.0333	96.2667
AGK	78.7	61.5	96.25	101.8	86.6	115.65	70.55	89.95	83.4	97.4	113.35	87.6	106.9	56.25	99.55	78.75	92	89.75	96.1	117.5
AGL	87.9	101.2	85.3	95.3	65.7	164.1	69.1	62.7	136	106.8	123.5	109.7	109.4	142	90.6	131.9	98	108.3	115.9	83.5
AGMAT	29.6	43.6	68.9	35.7	43.85	44.8	38	43.95	28.45	92.05	78.75	90.75	80.65	48.8	70.4	71.45	56	69.05	73.05	117.85
AGO1	141.8	123	181.1	139.9	141.3	129.9	168	134	114.3	175.9	202	179.9	161	203.1	208.5	204.4	245.1	180.2	224.1	282.3
AGO3	55.6	72.5	173.4	108.4	102.5	122.6	70.9	97.8	87.3	147	80.2	71.6	54.9	85.3	111.8	54.1	46.2	55.3	78.9	126
AGO4	62.9	23.9	49	37.8	48.7	43.9	38.8	34	31.7	33.2	30.8	38.4	84.4	46.8	51.2	51.1	27.4	30	44.8	52.2
AGPAT1	183	233.1	378.6	328.15	297.55	261.55	455	390.8	500	462.4	336.4	385.5	227	324.2	362.7	370.4	574.05	564.95	569.15	503.35
AGPAT2	122.15	206.2	161.5	129.5	225.45	95.85	234.15	163.4	246.9	337.75	167.6	115.7	178.35	192.55	143.8	202.25	190.95	131.5	127.8	205.3
AGPAT3	26	42.8	28.1	39.7	34.7	8.3	10.7	16.4	34.3	44.8	41.5	77.2	36.1	14.6	26.4	43.9	32.6	33.7	51.8	40.8
AGPAT4	77.2	76.7	82.4	57.4	11.3	8.1	6.4	21.2	51.7	52.4	124	100	112.6	92.6	95.9	107.3	42.5	52.6	91.4	77
AGPAT5	231.6	110.7	103.7	265.9	156.8	195.3	246.8	91	150	212.1	196.3	126.5	236.4	207.8	127.5	122.4	106.3	177.5	150.4	158.5
AGPS	84.8	101.6	82.9	82	97.5	73.3	85.1	56.5	83.8	163.9	112.3	170.9	101.8	92.1	161.1	151.5	145.4	184.8	157.9	152
AGR2	2.1	1.5	4.7	2.1	5	3.7	3.6	3.2	3.3	3.1	4.7	2.8	4	12.4	4.4	4.1	5.2	2.6	1.7	2.7
AGRN	42.4	65.075	90.525	54.85	108.925	56.225	83.5	109.85	129.25	105.975	88.225	90	49.35	77.125	80.9	85.8	149.325	116.525	102.7	129.375
AGRP	24.3	54	62.6	41.1	12.4	20.4	41.8	13.1	13.5	15.7	42	70.2	63.2	17.4	34.6	41.2	9.8	14.6	30.6	16.6
AGT	136.1	62.3	36.9	133.5	105.1	115.8	259.4	270.4	119.9	122.5	140.9	84.6	424.5	165.5	130.7	180.7	84.8	39.4	97.2	144.2
AGTPBP1	71.8	24.15	48.45	38.4	57.15	77.8	43.55	28.5	58.35	60.35	53.3	36.65	82.45	33.85	33.05	54.6	38.85	41.55	36.75	64.6
AGTR1	375.7	555.55	966.65	306.25	331.95	708.3	171.35	251.3	666.7	530.5	159.5	150.6	274.55	339.65	221	247.35	145.85	133.9	197.4	200.9
AGTR2	16.4667	14.7	14.8667	5.86667	14.7667	18.5333	14.1333	10.0667	17.1333	10.2	36.6	26.2667	11.0333	33.7333	5.26667	17.2667	6.23333	4.16667	18.6	29.5333
AGXT	9.43333	11.6	13.4333	14.0333	6.03333	15.0667	6.36667	27.3667	4.5	11.8667	9.43333	11.6667	25.4667	16.7	6.2	26.0667	5.3	8.93333	5.7	8.73333
AHCTF1	73.3	75.1	73.5	91.6	106.7	96.1	69.5	77.4	96.1	117.6	63.1	67.6	61.3	50.8	41.4	67.3	67.7	45.5	57.9	47.1
AHCY	215	184.6	204.1	393.9	137.8	123.5	242.7	147.6	161.3	203.5	139.4	211	154.4	176.3	188	168.7	152.9	137.7	219.7	193
AHCYL1	249.975	475.675	340.925	443.175	487	514.9	388.275	438.475	513.475	425.3	381.175	274.325	197.75	378.3	304.25	327.375	395.975	423.975	382.9	359.5
AHCYL2	86.7	50.85	72.35	44.5	66.6	117.85	38	56.65	62.55	61.7	101.3	76.5	72.05	69.65	91.95	93.1	84	107.8	124.1	96.55
AHDC1	19.7	67.4	59.1	44.1	64.8	14.8	15.3	14.5	62.4	129.6	63.6	92.5	30.2	36.7	47.6	64.9	19.3	93.6	57.6	81.2
AHI1	97.3	93.5667	98.4333	141.267	123.433	102.667	58.5667	131.3	78.5667	126.033	127.867	89.1	75.4333	96.5333	83.8667	98.2333	95	83.3	103.033	109.267
AHNAK	651.35	889.6	2054.1	1425.6	861.1	957.25	588.1	954.7	1226.8	1012.25	1231.7	1090.5	660.65	2150.55	995.05	1386.3	1202.35	1182.6	1328.7	1257.7
AHNAK2	178.4	193.5	327.1	106.9	259.8	239	225.8	320.8	410.2	305.3	477.3	233.3	218.9	553.6	165.1	449.3	221.8	169.3	310.2	179.9
AHR	271.4	198.3	147.4	173.6	258.3	271.5	135.5	151.5	204.5	120.2	370.2	427.2	780.1	387.6	297.9	286.6	416.4	339.6	452.7	296.8
AHSA1	399.3	307.1	405.3	452.7	265.5	124	422.4	228.1	255.2	430.9	219.1	269.6	434.5	293.6	273.4	186.2	244.6	231.2	254.3	252.7
AHSA2	22.5	31.1	21.4	33.1	22.6	39.4	5	48.5	41.4	39.5	82.2	52	51.5	54.9	73	35.8	70.9	52.4	27.8	94.7
AHSG	1.8	10.4	8.1	8.9	3.45	4.1	5.45	10.65	5.5	6.7	11.95	3.4	4.65	5.8	8.75	5.25	3.95	2.5	3.4	4.3
AHSP	20.1	29.5	28.2	12.8	32.3	58.9	92	55.9	31.4	46.7	45.4	28.5	40.4	32.5	44.2	70.2	52.4	33.5	39.7	132.7
AICDA	26.4	5.7	3.9	37	25.6	12.1	3.7	9.6	6.5	49	6	13.2	16.3	6.2	5.7	5.9	7.6	6.8	33.2	31.1
AIDA	286.4	342.4	238.1	130.3	164.3	183.5	193.4	116.8	313.2	208	173.3	428	239.8	343.6	280.3	492.7	330.1	382.9	359	223.2
AIF1	185.1	268.1	233.275	133.55	109.75	195.1	50.15	45	196.6	122.625	415.925	753.95	382.85	394.55	657.2	763.975	437.5	977.825	497.275	311.025
AIFM1	199	144.7	113.9	140.1	89.7	66.1	210.1	136.5	141.1	212.6	186.7	173.5	175.7	154.8	175.6	195.3	125.9	155.4	186.5	179.1
AIM1	176.3	212.1	202.6	210.9	203.8	273.9	157	211.3	207.7	296.3	413.8	241.2	225.6	365.2	274.6	371.1	297.1	298.3	302	244.8
AIM1L	3.5	11.6	7.2	45.6	39.95	41.4	34.3	39.8	26.25	10.6	47.5	29.75	18.05	32.8	34.2	45.9	41	32.6	23.05	44.95
AIM2	52.2	56.8	85.1	55.1	36.2	38.5	32.6	15.2	18.7	94.4	96	57.4	72.2	82.5	72.4	78.8	32.7	53.9	38.7	55.6
AIMP1	115.05	240.3	188.15	192.8	240.25	229.3	267.6	198.85	165.65	238.85	149.2	192.6	115.15	150	188.9	152.15	142.4	184.1	209.3	210.35
AIMP2	298.033	192.867	153.1	284.133	194.267	179.933	314.6	173.6	171.5	232.1	210.933	220.033	286.167	201.2	204.633	226	230.067	226.3	197.867	215.667
AIP	328.5	474	374.85	295.7	324.9	184.35	383.2	292.2	348.9	334.15	297.35	287.85	441.85	393.4	298.5	378.85	354.95	303.7	359.85	392.1
AIPL1	34.6	55.9	33.5	39.6	43.7	48.7	56.3	64	39.2	58.2	66.8	23.3	32.9	44	39.2	47.3	43	47.1	60.8	79.8
AIRE	11.7	41	9.4	8	8.4	8.2	8.1	11.3	5.7	10.5	10.3	6	9.5	7.4	4.7	28	12.7	16.1	4.4	9.9
AJAP1	16.1	15.075	20.65	18.675	13.95	13.025	18.075	30.575	20.825	33.1	23.975	23.15	26.875	17.925	22.025	15.525	28.85	20.85	26.75	38.125
AK021537	55.4	52.8	61.8	36.2	109.6	81.9	98.9	112.1	82.7	101.7	81.7	62.8	73.1	64.9	37.3	82.5	94	84.3	116.2	131.7
AK021933	15.9	34.05	19.4	26.5	5.35	28.2	8.4	29.5	12.05	31.65	22.25	20.85	24	45.6	14.45	24.4	14.05	9.25	25.05	37.3
AK055981	41.3	38.8	53	65.5	64.2	45.9	71.5	42.1	49.8	70.4	68.5	63.4	54.3	74.9	78.6	64.6	84.1	48.5	70.8	100.7
AK1	92.2	140.6	175.4	276.05	490.55	164.9	225.1	327.65	320.95	325	314.85	334.75	375.4	407.45	345.8	437.8	531.5	567.25	493.4	464.85
AK2	195.45	138.95	130.467	163.233	171.667	118.583	233.8	168.667	132.833	163.3	151.417	171.417	179.217	131.433	168.917	161.417	154.3	153.25	155.583	152.6
AK5	42.7	26.5	18.8	28.2	28.2	42.6	8.5	47	39	64.6	15.6	36	37.8	25.6	30.6	38.6	10.3	24.7	60.2	39.3
AK6	193.4	151.9	111.6	116.6	141	220	111.8	139.7	86	141.9	109.8	150.5	177.3	105.1	120.5	164.6	122.7	138.8	95.1	92.7
AKAP1	134.275	148.725	186.2	186.25	239.1	256.3	179.925	213.35	199.925	301.725	122.375	105.25	132.7	100.25	105.85	88.675	104.375	147.4	224.7	192.6
AKAP10	119.3	106.25	144.3	115.05	139.8	86.6	69	54.9	85.3	137.7	130.4	97.05	111.85	117.4	109.2	97.25	87.5	111.6	85.65	103.5
AKAP11	126.45	198.5	213.05	224.9	167.1	247.65	141.5	155.6	184.95	221.45	238.4	351.05	137.4	251.05	314	320.65	303.35	333.8	307.8	243.65
AKAP12	266.9	154.2	271.9	284.4	252.4	468.6	431.3	1400.7	351.6	600.7	343.1	211.7	282.9	312.3	355	334.9	272.4	293.4	401.9	475.8
AKAP13	210.58	429.94	444.8	422.82	331.64	325.2	201.78	606.22	318.22	359.6	354.6	216.56	157.48	170.58	164.78	188.22	114.78	168.18	247.92	247.4
AKAP17A	101.7	96	94.4	93.5	159.95	132.6	95.65	83.7	135.85	98.3	107.6	80.2	174.55	80.35	97.1	66.2	100.1	94.15	120.6	107.3
AKAP3	11.1	6.8	15.1	9.2	10.4	12	11.5	13.5	8.6	16.2	10.8	9.2	12.2	11.6	10.1	13.8	10.7	10.4	10.1	18.1
AKAP4	9	17.5	5.9	4.6	10.9	4.2	6.1	7.7	22.5	9.5	9.8	10.3	4.8	18.5	6.9	21.5	6.8	5.1	6.2	7.4
AKAP5	5.1	17.4	3.9	2.9	3.3	9.8	4.5	4.9	3.8	18.6	13.6	4.9	15.5	32.5	9.4	8.1	16.7	8.5	5.2	35.2
AKAP6	30.15	28.45	56.85	35.2	37.35	26.95	54.15	45.15	27.2	57.05	40.25	26.5	11.4	30.45	34.1	40.9	19	29.35	31.85	65.15
AKAP7	53.6	69.1	58.4	67	79.95	95.75	61.45	62	68.95	61	70.05	53.55	63.55	57.45	62.3	52.15	63.65	60.6	48.75	77.75
AKAP8	203.8	221.55	194.45	269.45	307.8	248.2	190.5	279.1	207.75	205.9	192.3	152.55	204.7	149.6	163.75	161.05	179.1	137.45	194.2	166.8
AKAP8L	46.8333	57.4667	55.6	45.6	76.2667	32.1333	48.4333	56.1667	72.3	66.4	70.4667	46.3	65.6667	44.1333	41.3333	33.6333	39.4	48.2333	55.2667	73.3667
AKAP9	78.7667	88.8	102.5	81.2	123.133	134.433	23.4	94.8	100.833	86.8	78.7667	73.4333	74.1333	65.2333	64.7	70.4333	76.7333	59.5333	92.3667	82.5667
AKIP1	106.7	87.3	68.4	50.8	57.6	76.3	55	47.6	106.2	57	85	136.5	208.8	105.3	152.5	129.8	108.2	90.3	138.6	85.6
AKIRIN1	54.3	89	35.8	109.8	131.2	8.8	50.9	133.1	67.4	38.3	59.5	84.4	92.6	40.4	11.7	29	31.3	58.1	56.3	51.6
AKR1A1	506.8	382.8	511.2	525.5	301.3	299.2	334.7	359	471.5	607	709.2	813.6	912.8	431.2	1022.6	924.8	760.1	924.4	711	496.3
AKR1B1	1789.1	2352.9	1551.2	2157.5	633.1	873.9	938.7	755.1	2563.9	1416.1	582.5	1109.1	1050.6	845	1229.6	1066.3	1022.6	1339.3	867.3	681
AKR1B10	135.9	180.5	213.2	192.2	51.7	292.8	28.5	82.9	115.8	453.3	27.8	80	60.6	55.2	66.5	31.3	71.2	41.3	65.2	91.1
AKR1C1	2496.6	1691.03	2390.77	2349.9	1109.23	1197.97	931.1	1416.63	2416.43	1694.6	1052.07	699.333	1626.83	2412.43	1089.7	2481.53	842.833	719.767	698.067	841.533
AKR1C3	818.5	100	401.4	346.8	269	282.6	235.8	200.1	368.4	570.3	445.8	301.9	966.2	827.4	417.9	633.4	241.6	267.4	320.2	217.7
AKR1C4	15.9	14	22.8	23.8	5.2	3.9	3.7	6.7	20.3	21.5	17.2	8.2	16.2	5.1	4.2	20.3	3.9	3.8	7.8	12.7
AKR1D1	22.2	13.3	20.7	19.2	15	20.7	18	18.7	15	26.7	8.2	12	9.8	13.8	15	17.3	27.7	18.3	17.5	34.1
AKR7A2	238.15	170.1	230.95	159.15	115.7	122.75	140.1	172.85	204.95	161.55	344.8	286.9	463.5	370	355.2	298.4	268.65	317.2	365.3	300.85
AKR7A3	44.55	74.4	107	83.9	68.95	41.35	30.65	69.55	101.5	97.55	120.85	83.85	88.55	125.2	89.65	91.2	124.7	113.8	117.15	121.95
AKT1	149.1	161.9	157.9	258.5	372.8	89.4	354.2	199.7	219.2	297.3	151.3	227.2	225.9	180.6	179.4	211.6	389.9	380.8	310.4	228.1
AKT2	23.75	26.95	7.9	31.75	13.3	4.5	6.95	8.75	8.1	40.7	13.65	34	26.6	5.65	42.65	19.15	3.7	13.1	24.45	33.8
AKT3	189.9	325.933	224.8	125.533	178.667	241.467	120.2	172.667	236.867	158.5	233.2	209.9	224.467	240.433	172.033	271.333	235	177.3	197.267	226.733
AKTIP	76.6	61.8	79.8	75.1	104	137.3	53	17.8	110.7	113.7	103.3	99	73.6	106.9	72.8	98.4	102.1	44.7	63.1	68.3
AL109706	26.6	26.8	3.6	35.6	2	1.1	26	15.5	1	22.8	30.4	34.2	10	33	18.3	15.7	1.1	7.1	20	9.5
AL590762.11	27	34.2	15.7	48.8	43.4	38	45.1	38.8	35.5	32.5	53.5	22.3	33	26.3	38.5	23.5	37	29.9	19.8	36.1
ALAD	28.5	33.95	25.3	62.05	37.15	26.45	26.25	32.1	41.65	50.85	76	68.9	81.65	58.4	77.95	104.2	36.95	55.55	75.45	53.15
ALAS1	103.5	125.4	115.3	149.2	149.6	155.4	184.4	210.4	122.9	155.9	146.9	127.5	161.3	103.4	160	115.9	120.2	165.7	151.4	92.8
ALAS2	5.9	4	11.7	6.1	6.1	4	11.9	8.2	4	6.1	5.4	4.3	5.3	5.2	8.4	9.3	3.5	7.2	6.3	5.8
ALB	18.2667	14.2667	8	13.8333	9.83333	11.4333	11.9	10.1	4.43333	11.6	15.6	4.33333	15.4333	16.6333	10.9333	24.3	8.4	6.76667	16.1	12.7
ALCAM	113.1	139.55	153.9	113.6	102.8	97.75	85.15	105.75	98.65	103.2	126.65	156.85	135.7	132.3	168.15	112.75	141.9	152.95	131.25	118.6
ALDH18A1	315.7	100.2	145.7	184.5	96	60.8	176.6	126.4	79.2	170.4	188.1	296.3	250.1	302.3	261.4	217.9	259.2	225.6	144.5	126
ALDH1A1	333.1	430	293.9	287.4	140.1	283.5	144.2	73.5	543.7	336	221.3	744.4	93.7	288.1	788.5	532.4	373	926.3	497.5	319.8
ALDH1A2	15.5	43	5.6	42.4	5.9	8.6	69.4	11.7	7	32.6	10.4	18.9	19.1	10.8	8.9	35.1	34.9	3.5	13.1	35.6
ALDH1A3	898.6	275.7	222.5	353.2	420.7	272.9	432.4	507.6	186.6	209.2	228.6	416.8	442.1	242.9	318.4	413.2	416.8	480	516.7	520.2
ALDH1B1	75	45.65	43.15	46.75	51	49.4	78.05	89.75	36.6	61.3	49.2	58.2	63.05	44.5	51.45	54.35	53.3	46.75	59.1	54.3
ALDH1L1	50.95	36.05	60.8	56.9	40.7	21.95	57.8	51.95	41.45	41	65.25	34.45	54.8	33.5	29.75	44.15	53.6	24.05	48.45	69.15
ALDH2	383.9	703.8	829.3	726.4	824.3	1102	587.5	569.3	1216.8	1439.9	970.6	1043	1092.6	821.8	981.3	1316.3	1415.4	2066.8	1220.3	1185.9
ALDH3A1	2	12.9	9.7	17.2	14.9	27.7	7.6	34.1	19.9	13.3	12.9	18.1	7.1	2.6	6.6	32.5	33.4	8.3	5.9	24.6
ALDH3A2	283.967	218.633	251.533	153.8	188.833	208.433	104.2	124.4	190.8	220.1	242.133	340.5	405	339.433	394.033	468.5	278.5	313.533	426.433	379.933
ALDH3B1	81.4	118.6	96.85	111.5	84.65	66.75	72.65	97.9	163.15	68.15	101.75	121.1	130.25	80.7	113.5	111.5	138.65	153.2	140.3	110.65
ALDH3B2	8	20.45	30.25	20.85	5.2	14.3	23.15	29.25	4.4	23.9	25.25	12.95	10.6	10.65	14.8	21.25	5.7	3.05	13.45	16
ALDH4A1	29.9	42.05	50.4	23.55	15.1	14.15	16.75	16.25	35.85	53.4	56.8	38.4	36.55	46.15	34.05	35.95	35.2	45.85	43.4	73.55
ALDH5A1	11.1	4.45	6.45	8.3	5.1	6.65	3.85	15.7	5.35	8.5	8.75	25.55	35.35	22.05	22.6	18.4	10.35	6.25	29.95	25.35
ALDH6A1	235.88	354.82	344.18	137.76	94.94	235.32	97.8	164.8	269.66	178.5	118.62	142.86	141.64	137.9	188.52	110.52	121.96	125.4	144.12	234.8
ALDH7A1	67.9333	64.4333	68.4	58	32.1667	71.0333	41.8667	48.6667	65.3667	61.9	95.7333	83.9333	46.0333	93.4667	121.9	86.3333	93.3	74.4333	121.767	79.9667
ALDH8A1	11.1	10.3	36.6	3.8	15	12.6	8.2	3.3	7.6	16.4	28.3	6.7	9.5	13.1	25.6	17.1	11.1	6	7.1	19.6
ALDH9A1	237.8	352.6	329.6	411.1	264.4	621.9	372.2	369	345.7	507.6	411	555.4	383.4	305.8	475.2	338.3	376.7	556.2	496.9	542.8
ALDOA	1538.25	1734.65	2112.05	2675.65	2041.9	709.6	2359.7	2276.8	2264.55	1375.35	1365.3	2154.75	3026.4	2291.85	2322.55	1703.45	2608.15	2087.9	1685.85	1462.65
ALDOAP2	2	6.9	26.2	8.3	2	3.2	2.5	4.5	1.8	3.2	12	1.4	2.1	19.9	10.6	20.9	2.2	1.8	9.4	3.9
ALDOB	25.9429	20.9286	29.4143	20.5857	22.4143	19.0429	17.6	28.8571	22.2571	30.4429	35.3429	16.0571	23.4286	25.2	18.3571	22.8143	20.4	18.1429	25.1	35.2429
ALDOC	94.1	125.6	162.5	202	248.7	132	323.4	281	177.7	218.6	135.3	142.3	157.6	150.4	149.5	136.1	206.9	178.2	197.7	176.3
ALG12	40.2	6.6	60.5	42.6	11.8	6.1	10.4	12.6	33.4	75	32.7	40.2	40	64.9	44.2	17	26.1	29.1	42.7	13.8
ALG13	120.733	82.3333	85.8	108.167	65.1333	98.9	87.0333	57.5667	83.1333	97.4333	127	76.6667	78.6	79.8333	89.3667	82.7667	86.4667	98.2333	87.9667	80.8333
ALG3	153.7	141.4	96.2	154.6	89.8	117.2	170.1	101	133	198.1	168.4	130.7	158.5	111.8	177.8	147	97.9	143.6	192.1	166.1
ALG5	470.8	411.8	376.1	465.9	433.7	489.9	464.6	320.5	409.3	422.8	371.2	514.6	699.8	406.3	395.4	489.1	427.2	422.7	393.6	359.1
ALG6	82.4	142	238.3	125.5	133.2	182.3	184.8	113.9	153.1	204.7	165.6	147.4	112.9	138.7	151.7	140.3	193.9	173.9	183.9	185.1
ALG8	172.7	182	231.9	263.1	152.8	193.7	281.6	246.4	211.6	273.7	196.9	237.9	163.8	206.2	236.6	193.5	264.1	221.1	262.7	236.9
ALG9	66.4	93.2	78	86.7	96.1	77.9	79.9	134.6	80.5	107.9	102.9	71.8	67.2	85.8	91.2	118.5	105.5	106.1	103.2	112.6
ALK	41.5	48.95	44.7	39.8	31.15	16.3	35.5	21.2	38.75	51.75	17.5	36.7	41.6	31.9	43.2	24.65	18.35	27.7	15.9	41.1
ALKBH1	202.5	165.2	228.6	82.4	149.5	227.6	158.4	145.8	167	161.7	144.9	168.9	176.5	123.4	167.4	151	157.7	176.4	169.3	143.8
ALKBH4	35.8	9	37.3	30.7	35.8	40.4	66.2	33.3	48.1	71.9	84.8	47.2	38	34.7	64.5	36.4	70.6	35.4	89.7	70.3
ALLC	7	49.5	33.1	16.9	5.8	6.4	5.8	14.3	8.3	50.3	57.6	10.6	44.6	32.9	39.8	27	3.2	4.5	16.2	13.2
ALMS1	106.3	128.067	135.167	132.967	125.033	170.3	115.7	133.667	108.467	120.067	161.967	112.167	154.2	98.5667	87	75.7333	104.467	80.6667	110.6	220.033
ALOX12	5	6.1	37.6	21.6	4	4.4	8.4	5.1	3.3	12.7	7.1	30	26.1	12.1	6.7	5.6	6.6	5.6	8.2	30.4
ALOX12B	2.4	2.9	3	5.9	7.6	5.1	4.6	16.7	2.6	3.2	8.2	3.8	5.9	6.9	3.2	4.2	4.6	4.8	4.2	7.2
ALOX12P2	51.8	11.1	8.5	12.4	7.3	11.8	11	18.5	11.7	12.5	17.5	12.9	70.1	58.7	12.2	16	22.2	9.8	14.7	22.8
ALOX15	2.7	2.7	3.1	2.5	4.4	5.7	6	3.8	2.9	6.2	4.2	3.4	2.5	6.9	2	4.3	5.8	4	4.4	10.8
ALOX15B	9.2	82.3	83.8	26.9	50.9	54.5	88.6	74.3	77.1	83.4	49.9	74	29.1	45.9	23.9	29.7	22	70.3	36.9	66.4
ALOX5	175.3	70.675	89.725	104	63.725	84.3	89.425	54.1	93.05	94.45	129.025	148.975	228.275	85.5	154	176.775	131.8	198.125	104.175	132.35
ALOX5AP	1396.5	1258.3	620.5	741.2	456.7	363.7	542.6	173.9	1098.4	629.9	516.3	1539.4	290.7	615.1	1302.2	1488.9	976.5	1290.4	1073.1	740.1
ALOXE3	25.2	44.45	57.7	42.95	69.2	67.05	69.65	78.25	36.7	59.1	98.1	42.25	51.55	47.4	46.8	25.7	35.8	36.7	45.7	63.6
ALPI	2.7	1.45	2.4	2.55	1.9	1.85	2.2	3	2.1	3	3	1.9	1.95	2.4	1.95	2.9	2.5	1.8	1.7	2.9
ALPK1	70.8	30.7	71.9	113.8	86.8	66.8	101.3	147	50.1	61.5	84	61.6	84.3	48.3	62.3	62.4	36.6	9.9	96.5	124
ALPK3	7.2	39	10.1	28.7	72.5	11.7	14.6	17.4	11.5	21	19.9	11.6	27.7	30.6	44.5	12.9	14.6	11.8	13.8	20.3
ALPL	26.6	13.7	40.1	25.5	8.1	9.8	19.3	33.7	30.4	58.6	50.7	33.1	13	53.3	32.2	34.4	9.3	23.6	45.6	74.4
ALPP	2.8	2.9	5.6	3.5	3.3	2.9	3.6	5.2	2.7	4.2	5.5	2.4	3.6	3.2	3.4	8.1	3.8	2.7	2.4	4.5
ALPPL2	36	53.7	50.3	31.75	30.95	31.65	38.25	42.65	33.4	77.15	46.75	36.25	57.15	20.4	24	34.85	41.05	34.45	40.45	101.8
ALS2CL	82.5	101.5	200.9	127.3	179.8	145.1	190.3	228.4	143	189.1	158.1	133.7	130.5	155.2	135.6	121.1	183.6	184.6	204.1	270.3
ALX1	6.1	6.5	12.4	6.5	10.4	13.4	11.4	11.3	8	13.5	7.7	4.8	10.8	4.6	4.9	10.9	8.6	9.7	8	11.6
ALX3	25.6	39.9	29.4	10.9	47.1	28.9	10.6	10.8	14.1	20.8	53.5	26.1	32.1	5.5	11.7	13	49.1	6.5	19.8	25.7
ALX4	7.8	18.1	42.1	7.3	10.6	11.2	19.9	13.8	9.8	15.6	15.6	27.2	37.6	10.5	12.7	10.7	13.3	10.8	33	18.4
AMACR	1.85	6.95	5.55	8.65	3.8	2.6	16.6	5.65	10.35	5.9	6.1	9.9	9.1	4.25	2.15	5.95	4.2	2	5.1	4.35
AMBN	10	9.6	21.1	16.3	14.5	14.3	22.7	20.7	10.8	19.8	30.5	15	10.7	19.1	16.1	9.9	13.6	6.6	11.2	13.5
AMBP	21.75	30.75	25.65	10.55	30.65	25.15	27.75	29.05	27.7	27.75	24.95	22.65	25.35	21.2	25.5	24.05	35.9	26.8	33.55	46.65
AMBRA1	93.75	65.4	106.85	95.45	110.8	88.6	45.95	47.1	111.1	53	88.1	42.8	146.95	84.5	77.7	82.6	80	60.6	71.3	84.75
AMD1	330	252.1	153.5	187.05	230.3	191.7	233.5	175.9	116.45	163.5	121.8	164.8	65.1	126.8	164.1	150.95	149.4	161.9	151.65	128.35
AMELX	20.1	16.8	36	20.6	10.1	8.6	8.7	21.3	6	26.5	32.4	8.7	16.6	21.5	9	3.1	13.6	5.5	21.7	31.6
AMELY	13	26.4	33.9	34.1	22.6	16.5	4.7	54.2	29.7	40.7	2.9	31.6	38.2	25.4	38.3	34.8	21.3	36.6	30.1	65.8
AMFR	113.25	64.5	69.4	117	100.75	109.45	95.5	103.3	101.55	85.05	92.3	66.2	90.3	129.8	230.65	136.8	246.8	62.8	201.25	119.85
AMHR2	6.2	8.2	16.6	7.6	10.3	16.1	17.2	23.6	7.6	21.3	11	11.7	6.7	9.3	7.3	13.5	11.5	10.5	16.4	12.7
AMIGO2	119.3	227.3	121.1	181.6	97.5	295.3	31.5	77.1	180	126.5	87	37.8	125.6	94.5	61.4	129.1	101.6	63	103.3	106.7
AMMECR1	34.2	47.4	54.4	54.5	41.1	84	51	29.7	41.9	66.8	76.5	50.3	27.1	37.3	29.6	37.9	38.2	64.3	50.8	62.4
AMN	20.1	52.8	13.2	59.6	81.3	33.7	43.4	53.1	58.4	32.2	13.5	45	37.8	17.7	45.8	38.8	94.8	56.6	53.8	137.6
AMOT	32.5	14.6	22.4	32.4	26.7	26.6	23.9	36.5	35.2	48.5	71.8	32.4	22.1	48.5	24.6	40.1	40	50.6	35.5	53.5
AMOTL2	189.3	248.1	361.7	289.3	425	493.5	285.5	253.1	389.3	355.2	267.1	187.8	328.3	291.5	235.5	228.2	156.4	293.7	356.8	287.4
AMPD1	8.2	20.4	24.6	48.7	30.3	43.6	69.4	63.8	41.3	54.9	54.6	35.5	46.4	24.3	54.8	26.7	56.7	49.5	39.3	78.3
AMPD2	173.4	132.9	158.1	285.3	236.4	119.6	149.8	199	204.2	280.5	252.3	229.5	288.3	176.8	161.3	133.9	142.4	184.3	300	244.2
AMPD3	51.9	117.4	97	63	188.6	134.2	161.3	157	116	125.4	136.5	113.5	112.1	70.7	119.8	106.2	126.7	197.1	158.6	122.9
AMPH	138	72.5	76	57.9	119.4	86.2	171	154.1	107.9	224.3	117.1	43.2	39.1	68	32.7	59.9	19.1	45.3	67.8	141.4
AMT	127.4	115.2	127.3	149.2	142.8	127.8	117.8	274.9	159.8	139.4	244.6	143.8	214.4	178.5	163	151.4	227.2	215.7	212.5	292.5
AMZ2	317.8	260.7	276.6	255.8	243.7	329.4	218.5	233.7	293.4	293.9	240.1	249.8	262.2	286.3	326.8	298.4	322.7	385.1	328.3	328.4
ANAPC10	61	77.9	60.1	47.9	33.8	52.9	64.8	2	55.2	53	56.1	77.9	74.5	47.2	77	75.2	45.8	58.5	58.7	44.1
ANAPC13	238.8	398.55	342.85	393.35	382.45	456.6	316.85	333.7	415.6	442.65	382.45	455.35	227.75	396.4	434.05	427.15	362.2	461.95	400.35	419
ANAPC15	153.9	141.5	137.6	134.1	139.7	142.2	156.7	151.3	166.8	101.4	167.6	140.7	240.4	119.4	146.9	219.4	176.1	162.4	134.8	180
ANAPC2	34.8	101.5	136.7	111.9	119.3	45.1	109.5	180.2	116.1	151	158.9	98.6	51.6	131.4	48.7	87.9	101.1	77.7	96.6	124.3
ANAPC5	403.1	272.7	355.875	509.5	327.475	293.725	372.4	295.925	336.85	374.625	391.025	389.175	494.5	383.5	343.6	340.825	421.15	449.575	422.1	337.35
ANG	213.8	445.1	489	111.9	96.5	106.7	105.7	146.3	201.7	129.4	16.3	95.9	65.1	92.2	93.3	163.6	63.1	40.6	110.9	113.9
ANGEL1	90.6	126.85	155.55	111.1	71	67.2	70.55	62.3	110	43.1	97.1	127.6	101.65	103.6	98.75	89.45	126.3	130.1	133.7	71.5
ANGEL2	132.133	70.6667	79.5667	87.2333	78.3	117.967	42.4333	48.1667	81.1667	88.7667	80.4	87.2	126.933	75.4	96.3	82.2	69.5333	72.9	107.2	90.5
ANGPT1	114.9	122.3	263.25	132.55	84.45	207.25	94.6	172.45	142.65	212.25	143.75	254.15	187.8	152.95	387.2	110.8	155.45	218.55	245.45	408.25
ANGPT2	24.45	7.05	21.25	26.1	87.8	6.65	136.2	43.7	22.8	45.7	50.05	23.5	22.65	50.85	8.8	28.95	17.5	4.55	21.25	17.3
ANGPT4	10.9	10.1	30.3	12.9	8.7	4.3	3.6	19.6	23.4	4.5	14.6	20.3	14.4	9.1	16.4	10.4	3.9	24	12.8	4.2
ANGPTL2	327.967	313.233	365.267	412.267	1079.9	599.1	584.967	801.867	428.2	484.067	997.367	1001.97	1098.1	1852.67	1537.6	2187.07	1790.27	836.733	1127.97	1023.7
ANGPTL3	12.6	13.9	34.8	13.5	11.5	7.2	4.7	17.3	13.6	19.9	22.3	4.2	2	5.3	5.6	10.2	34	9.9	17.2	11.6
ANGPTL4	124.7	136.9	52.4	277	616.6	195.5	2014.8	2593	216.9	146.7	178.3	98.8	156.7	68.1	112.6	119.5	253.8	185.3	100.6	187.8
ANGPTL7	536.8	125.7	540	118.8	44.6	1281.6	59.9	94.6	540.8	282.7	4.2	19	2.9	39.8	2.8	52.8	11	4.9	8.4	17.5
ANK1	19.7333	16.0833	20.05	11.5	8.35	9.93333	7.88333	20.6833	7.11667	23.5	29.6	25.6	26.15	28.6833	25.7167	40.8333	10.8667	17.45	28.3667	33.95
ANK2	258.5	280.533	201.3	154	183.733	169.133	135.367	252.433	181.2	220.967	218.6	217.333	138.167	353.367	213.333	470.8	229.733	137.233	279.4	249.967
ANK3	66.9	74.2	238.1	79.8667	64.1	97.2	76.6	131.033	74.6	193.533	207.733	453.3	264.7	184.6	247.2	143.5	173.3	232.967	407.733	381.167
ANKEF1	2.7	13.1	3.1	14	7.8	2.3	1.7	5.3	2.1	4.2	4.2	1.2	5.8	2.7	4.2	17.4	3	7.3	7.6	16.5
ANKFY1	135.1	143.3	98.1	59.6	58.6	32.3	69.7	63.6	45.3	95.1	112.4	174.2	139.6	143.2	160.2	135.9	131	82.1	130.5	175.3
ANKH	136.6	100.6	37	85.3	109	88	7	106	97.4	54.1	393.8	251.8	290.7	286.2	432.7	300.8	669.3	498.3	238.6	111
ANKLE2	71.7	45.8667	54.3667	62.1667	64.4	40.8	49.1667	49.8667	55.9	50.3	38.6333	52.3333	61.6667	44.8667	32.5333	49.4	53.8667	47.9333	51.9333	60.4667
ANKMY1	20.2	5.3	12	17.2	20.3	20.1	23.7	39.9	9	10.95	7.7	8.45	34.8	37.15	24.5	16.05	17.1	27.85	18.4	8.15
ANKMY2	139	197.6	255	229.6	141.9	373.3	97.2	217.9	224	182.4	319.8	438.7	256.4	497.3	375.1	368.2	415.5	367.7	467.4	378.7
ANKRA2	153.1	225.7	203.8	125	106.2	178.7	76.7	89.1	165.6	161.1	75.7	107	157.1	96.5	122.6	91.8	68	125.7	142	98.7
ANKRD1	4.7	10	1.6	15.1	4.9	13.5	13.9	21	35.4	12.2	3.4	2.3	8.5	1.5	2.8	11	20.8	3.5	2.7	5.4
ANKRD10	403.2	313.4	279.4	276.3	435.8	266.9	202.9	203	272.6	313.2	597.3	324.2	483.2	360.2	346.8	434.4	495.7	368.9	319.4	282.2
ANKRD10-IT1	336.3	165.3	283.8	318.1	319.2	377.8	392.7	443.2	255.6	233.4	259.5	420.4	123.6	266.2	409.7	284.7	165.1	249.8	291	519.7
ANKRD11	101	127.3	118.3	142	107.8	39.4	77.9	111.1	89	124.7	139.3	121.5	71.2	69.4	75.5	38.3	3	41	20.8	72
ANKRD12	62.125	94.9	70.075	68.8	90.275	102.4	31.375	99.75	88.375	88.8	98.2	93.525	82.4	71.95	71.95	70.725	40.5	66.975	74.225	75.925
ANKRD17	185.8	158.1	186.7	125.2	192	143.1	196	125.7	149	189	206.7	171.2	76.7	152.2	197.2	195.6	190.2	171.7	174.9	150.4
ANKRD2	5.6	4.8	5.1	7.9	3.8	5.7	9.4	10.8	5.1	9.8	41.6	9.2	9	11.1	12.3	34.8	5.7	4.3	6.2	10.2
ANKRD26	3.65	18.95	17.55	21.5	18.85	26.35	18.1	36.5	26.05	44.95	32.75	24.35	23.95	23.65	21	18.05	21.45	15.35	34.95	61.25
ANKRD27	202.1	174.1	155.2	99.4	126.6	177.8	107.4	133.1	206.2	176	167.2	166	256.2	155.4	138.8	159.5	147.7	170	165.2	154.2
ANKRD28	200.8	669.9	486.8	253.7	176.3	191.1	192.5	226.6	336.2	261	237.7	130.5	143.2	255.3	198.7	305.9	186.2	121.9	169.1	179.1
ANKRD34C	27.5	19.4	51.3	22.4	13	27.6	23.4	29.7	17.7	36.2	28.2	19.1	31	27.5	14.9	15.6	43.7	13.8	23.9	48.4
ANKRD36	4.9	24.8	20	21	18	42.8	7	42	26.2	47.7	27.3	19.2	25	24	16.6	3.8	8.8	8.7	14.9	42.8
ANKRD36B	17.3	35.2	68	79.7	62	68.5	58.6	97.6	72.7	82.5	157.9	49.3	50.1	55.4	51.9	25.2	35.2	40.9	58	93.5
ANKRD36BP2	0.3	0.8	11.9	1.2	0.5	0.6	0.7	0.8	0.7	1.4	0.5	0.6	0.5	0.7	5.7	3.5	2.2	0.6	1	2.3
ANKRD40	142.7	82.1	66.3	61.9	35.7	6.3	45.6	37.1	77.6	123.8	15.8	62.2	22.3	61.9	79.7	89.8	19.7	45.2	43.4	7.7
ANKRD46	76.8	93.8	133.7	59.6	105.3	163.6	85	51	113.2	139.3	125.9	115.9	78.8	134.9	151.5	109.1	118.3	113.5	151.3	148.3
ANKRD49	212.6	182.2	165.4	136.8	263.1	220.8	104.1	76.5	161.8	185.6	106.5	164.5	103.1	101.8	162.9	161.8	189.7	187.2	170.9	83.8
ANKRD53	4	9.1	13.4	4.3	2.3	7.4	5.1	3.9	2.4	5.1	8.3	6.9	15	7.3	8.6	12.5	16.1	3.6	5.6	9.9
ANKRD55	17.7	12.9	38.7	37.5	28.1	33.9	27.7	32.4	28.4	66.2	43.2	32.2	46.6	24.1	32.5	31.7	55.3	65.4	46.7	69.4
ANKRD6	38.45	31.5	53.8	39.45	53.2	61	13.4	24.1	39.7	56.35	62	41.25	59.4	46.05	32.05	72.15	32.15	17.25	50.95	51.5
ANKRD7	1.8	0.5	2.4	13.4	3.5	8.8	5.5	2.1	1	4.3	13.1	1.3	5	8.6	8.2	14.6	1.4	1.1	6.6	1.5
ANKS1A	166.9	134.2	135	148.4	155.9	120.7	67	91.4	172.6	188.8	197.5	105.5	261.4	153.4	158.9	115	138.5	122.3	157	134.2
ANKS1B	1.6	3.7	2	10.9	3.8	5.5	7.5	4.6	3.7	7.6	4.7	7.9	1.5	2.8	22.5	2.5	7.8	5	18	18.7
ANKZF1	56.1	34	51.2	41.3	6.7	5.4	26.6	11.2	57.2	8.9	21.6	21.9	10.4	46	18.6	6.1	6.8	37	16.6	24.3
ANO1	17.6	13.1	41.9	29.7	49.8	77.1	70.4	42.4	52.2	44.6	145.7	44.9	40.5	86	33.6	81.7	131.8	56.4	47.3	39.8
ANO10	185.9	71.4	172.1	143.7	57.8	88.9	99.4	108	125.6	109.6	159.7	111.9	258.5	157.8	127.8	155.7	108.2	118.2	131.3	63.9
ANO2	29.8	8.3	4.2	35.8	42.6	44.3	27.4	9.8	15.4	39	41.1	6.8	36.1	13	8.8	45.4	16.4	10	29.2	34.7
ANO3	12.4	28.6	45.5	16.9	31	5.4	23.2	6.5	13	23.2	24.2	32.6	14.8	18.3	32.2	30.8	34.3	21.7	16	32.4
ANP32A	250.133	229.4	238.133	289.867	238.733	238.367	216.433	259.5	283.233	188	199.1	252	110.567	222.8	300.067	285.167	193.6	231.1	257.867	262.733
ANP32A-IT1	10.4	12	32.3	12.5	4.9	1.7	4.5	5.7	17.4	14.7	30.4	16.1	10.5	27.1	18.5	28	1.9	12.8	4.7	11.1
ANP32B	1256.7	1789.1	2079.25	1627.5	1302.5	1695.55	1314	1397.6	1285.3	1064.55	1198.8	1042.25	1039.75	1082.85	1299.95	1495.75	828	829.8	907.95	797.2
ANP32C	3.5	9.3	7.3	2.3	2.2	3.2	5.6	5	1.9	5.3	7.5	4.5	2.8	8.9	4	5.1	4.9	2	3.7	6.3
ANP32D	0.9	2.7	4.6	1.5	3.3	4.3	3.9	37.6	3.2	16.7	4.4	1.2	9.5	5.2	8.3	2.9	7.7	7.7	1.8	5.4
ANP32E	136.55	291.6	191.45	302.25	287.5	362.6	205.75	224.1	201.6	207.15	182	187.8	158.85	155.75	187.45	192.45	160.35	198.85	188.45	156
ANPEP	517.8	619.5	690.9	952.1	256.5	447.8	171.9	426.3	945.4	326.7	329.5	316.1	352.4	237.4	390.5	274.5	318	282.7	307.4	274.3
ANTXR1	24.75	15.6	8.95	5.85	12.1	10.25	5.6	37.15	10.1	16.6	43.2	33.05	20	38.25	54.2	27.1	22.4	26.4	25.7	33.45
ANXA1	1209.3	3821.2	3517.5	3214.8	3803.7	4574.3	2357.5	3397.7	2686.7	2495.3	2593.9	2787.7	1289.8	3296.9	3884.2	4624.1	3134.2	2730.7	2731.8	2286.9
ANXA10	6.8	5.2	8.2	20.2	12.3	10.9	43.2	46.4	5.4	15.3	31.2	19.6	13.6	6.3	8.1	25.9	14.8	60.9	11.6	23.6
ANXA11	220.05	234.75	361.95	463.95	513.25	500.9	348.35	583.8	471.15	353.15	412.9	388	402.65	436.35	371.85	329.75	417.5	448.15	566.45	422.15
ANXA13	26.5	10.9	37.2	8.6	25.2	16	30.7	75	18.6	31.9	15.6	11.7	32.6	10.2	10	33	14	24	17.5	13
ANXA2	6568.7	3567.73	6393.17	4806.77	2393.43	2826.37	3328.2	4011.6	3186.4	2796.83	5172.5	5542.67	3421.17	8284.27	7204.43	7502.77	4313.77	4156.57	3620.2	4080.47
ANXA2P1	22.5	45.1	34.7	43.4	30.2	28.9	20.5	64.3	23.2	26.5	58.1	41.7	37.7	48.5	65.1	40.4	34	25.4	26.7	48.9
ANXA2P2	1115.8	666.1	880	788.9	912.3	688.8	844.1	936	602.1	745.1	1115	1135.4	639.6	1457.3	1382.9	1341.4	1083.8	809.1	856.5	1136.8
ANXA2P3	101.3	53.8	45.5	88.9	39.2	41.1	64	85.5	57.6	66.3	158.3	118	62	151.5	106.8	82.6	56.6	76.6	102.2	113.7
ANXA3	60	24.7	46.7	29.4	27.3	60.4	35.5	19.9	44.2	35.3	72.3	31.4	17.2	44.6	47.8	46.5	29.9	18.3	37.7	34.2
ANXA4	779.1	955.35	1059.95	541.85	428.75	985.5	605.3	421.65	940.5	649.45	889.55	1031.7	859.55	1339.25	1017.75	1733.9	884.95	1097.5	895.75	855.9
ANXA5	2074	1343.1	1744.6	2098.6	1357	1608.3	1778.3	2137.4	1928.5	1624	2025.3	1663.3	2206.3	2447.9	2112.7	2167.2	1557	1978.8	1665.2	1668.8
ANXA6	322.1	301.2	543.2	474.8	266.6	197.2	314.7	209.8	423.1	395	574.5	438.1	361.5	426.4	335.9	235.2	271.9	305.7	570.2	428.3
ANXA7	745.3	659.05	541.4	651.9	614.55	936.1	567.65	528.35	653.85	525.25	577.5	575.95	779.7	571.35	714	819.5	601.65	644.25	560.85	488.5
ANXA9	25.1	14.7	16.75	19.75	10.8	17.95	13.15	11.15	8.3	13.2	25.15	17	22.15	5.65	5.55	19.55	29.75	21.35	8.7	28.55
AOAH	33.3	6.6	14.5	7.2	5.2	3.1	5.1	9.2	8	9.2	51.9	67	6.9	46.5	7.2	12.1	12	52.6	41.4	14.3
AOC1	25.3	32.8	55	45.8	6.5	31.1	29.1	27.2	36.6	56.7	26.5	126	30.6	34.5	37.7	51.7	43.9	26.9	45.2	91.1
AOC2	91.5	176.4	237.5	125.5	61.9	65.5	88.2	74.7	174.7	103.5	107.5	34.5	54.1	61.8	56.5	53.2	50.8	47	52.7	102.3
AOC3	180.6	352.5	492.5	388.1	238.8	368.1	154.5	246.2	365.7	259.9	278.5	128.7	481.3	346.2	104.7	209.7	158.5	69.4	200.2	180.2
AOC4P	25.1	13.6	22.8	19.3	19.6	13.5	26.8	23.9	19.3	23.6	15.1	42.2	35.6	20.5	40	18.3	28.6	14.2	12.1	19
AOX1	712	477.75	272.7	257.95	123.5	233.6	199.6	145.75	316.15	233.75	66	107.85	54.9	204.05	119.65	270.45	72.45	104.4	103.85	95.5
AP1AR	75.4	63.6	57.9	74.2	49.3	62.7	53.1	34.9	51.7	74.1	35.6	49.2	64.7	49.2	38.9	48.7	49.8	37.3	36.6	49.1
AP1B1	97.8	86.2	176.9	155.5	158.1	83.1	141.5	87.9	183.6	122.6	154.7	335.1	223.4	136.5	231.5	174.8	215.2	341.5	193.8	132.2
AP1G1	113.3	74.2	85	110.2	105.2	69.4	26.2	140.9	58.8	31	62.7	111.4	19.8	68.7	85.7	98.7	16.3	90.2	115.3	78
AP1G2	10.95	30	23	16.85	22.45	7.3	14.4	20.3	34.3	32.55	26.95	21.75	22.35	29.65	6.4	15.65	24.85	27.2	18.4	41.45
AP1M2	15.8	23.15	60.15	38.8	28.8	52.15	40.3	38.5	28.2	25.4	19.25	27.65	40.5	41.1	37.5	40.3	27.3	62.85	49.65	27.6
AP1S1	52.2667	27.6667	54.7	33.4667	40.3	33.4333	44.0333	45.1	55.1333	55.0333	58.2	62.9	45.2333	33.8	62.4667	37.9	27.8333	64.7667	68.4667	76.6333
AP1S2	358.8	271.5	281.9	244.95	161.55	193.75	238.2	190.85	252.7	295.15	268.6	375.25	406.9	400.6	424.65	365.8	274.35	316.25	388.25	297
AP2A2	315.225	440.45	316.725	368.7	254.4	241.8	238.775	270.25	412.675	323.225	291.25	355.775	350.9	361.025	290.8	352.175	437.3	484.6	371.975	388.75
AP2B1	191.65	200.15	348.7	335.3	212.1	154.95	282.3	196.55	232.3	254.9	232.3	288.5	74.3	238.55	260	142.3	293.3	333.95	375.05	381.8
AP2M1	511.5	714	459	846.6	530	243.5	511.6	623.5	950.2	688.7	697	892.1	1036.7	774.5	802.7	713	937.6	747.6	891.7	704.3
AP2S1	576.233	473.467	329.6	529.2	343.767	152.767	393.633	324.933	470.633	543.167	488.2	480.2	686.4	571	653.133	571.5	624.433	734.033	557.9	552.667
AP3B1	125.85	100.15	133.5	133.1	158.85	107.45	157.8	101.4	116.55	129.7	160.25	179.45	76.55	145.25	154.55	145.85	167.35	214.85	190.7	189.6
AP3B2	36.9	28.2	32.2	41.2	19.4	5.7	16.5	33.1	19.4	22.7	40.1	17.7	30.8	16.6	15.5	17.6	18.1	18.3	25.6	39.2
AP3D1	134.667	184.367	167.633	155.733	137.667	111.267	119.7	140.467	165.367	128.4	199.6	208.533	205.9	181.867	171.467	133.3	161.067	144.4	141.033	148.3
AP3M2	154	94.5	103.9	70.8	105.2	135.4	101.7	65.7	54.6	108.1	120	145.8	76.6	157.6	95	138.1	142.8	113.3	146.7	140.8
AP3S1	1640.3	1216.1	1626.9	1464.5	1570.5	3168.3	1523.4	1469.4	2049.9	1369.9	1438.4	1339.3	2289.6	1381.5	1489.1	1428	1355.4	1508.9	1286.4	1115.9
AP4E1	11.2	4.2	3.8	8.65	2.45	4.7	4.1	4.2	6.9	8.4	13.85	23.85	13.35	3.9	11.35	24.4	3.4	3	10.05	7.1
AP4M1	9.3	38.5	10.3	10.9	14.3	9.9	11.9	17.5	20.4	20.1	59.5	64.1	58.4	54.4	50.7	75.5	52.7	18.9	26.6	23.5
AP4S1	16.6	17.8	8.7	19.3	9.36667	13.3667	13.0667	10.4	13.1	21.7	21.8	10.0667	10.3667	11.2	23.6333	8.1	19.1	14.9667	17.5333	18.4
AP5M1	201.8	158.1	110.7	153.3	139.7	238.8	119.5	79.8	179.1	180.8	225.6	219.1	139.3	154.7	185.7	220.6	165.2	229.5	215	191.1
AP5S1	120.9	87.3	120.3	122.4	123.3	208.5	121.1	107.4	140.9	126.8	153.3	124.1	107	109.4	92.6	135.5	169.3	141.4	112.4	146.4
APAF1	29.4333	24.2333	50.5	52.1667	27.2	39.5333	46.1333	37.1	31.1333	31.3667	47.1667	62.8667	64.1333	44.2333	25.7	33.2667	25.1333	30.8333	54.2333	41.3667
APBA1	27.1	11.9	52.9	50.9	36.2	13.2	53.5	31.7	6.7	9.5	47.7	9.5	37.2	64.6	11.8	12.9	10.2	9	5.5	33.6
APBA2	3.55	13.55	21.6	6.3	17.9	8.85	20.65	33.3	11.35	15.95	10.1	6	4	7.9	22.25	11.45	41.65	14.3	11.25	71.8
APBA3	35.85	51.8	63.2	43.8	86.85	53.7	61.95	55.35	74.15	88.7	76.65	49	52.2	53.9	44.45	40.85	67.5	61.55	41.4	92.35
APBB1	28.4	109.7	86.8	114.8	77.8	62	110.6	151.9	132.4	139.9	109.4	107.2	67.5	53.4	48.2	59.3	142.2	103.4	70.3	91.2
APBB1IP	160.4	90.9	101.9	166	70.6	56	74.8	36.7	126.7	100.4	67	137.9	195.7	134.2	136.2	125.3	55.6	119.5	133.9	148.2
APBB2	73.3143	64.1429	110.871	98.1714	62.6	104.814	72.6571	78.4286	90.1857	87.6	113	75.3143	56.7429	76.3714	64.0429	70.1714	80.5857	56.4857	88.3286	87.3571
APC	33.74	33.46	41.74	41.68	37.06	39.66	32.72	39.98	35.94	41.46	46.54	46.86	32.94	46.96	52.64	42.98	53.5	35.64	44.42	57.96
APC2	14.15	11.25	14.8	18.7	23.85	17.15	12.95	37.85	17.3	28.75	17.35	9.95	17.8	13.9	5.7	11.8	18.1	7.25	13.9	23.4
APCS	49.4	32.7	51.3	29.2	56.2	26.5	61.4	11.8	16.5	69.5	57.5	69.4	29.5	32.9	45.9	55	69.7	53.1	37	99.5
APEH	133	125.9	142.8	158.2	61.9	14.7	69.4	17.7	134.2	133.4	167.5	162.1	144.6	144.5	130.7	200.3	58.3	151	138.8	70.5
APEX1	948.1	632	471.1	631.5	609.9	374.4	761.4	398.9	493.7	774.9	470.4	542.7	508.6	510.8	559.8	722.6	506.4	497.4	554.5	523.6
APEX2	50.8	50.2	53.8	91.6	61.4	38	122.2	88.3	70.3	94.8	85.9	94.1	33.9	44.1	83.8	36.3	79	99.4	66.2	90.9
APH1A	367.1	347.6	364.1	379.7	390.3	237.3	351.9	332.6	384.8	462.5	399	408.1	467.5	394	393.4	371.8	390.7	457.9	432.3	595.2
APH1B	185.3	171.3	137	127.7	104.7	126	116.9	177	222.1	215.3	147.2	199.1	166.5	163.9	160.9	155.2	168.3	185.8	175.3	210
API5	133.275	113.25	75.9	119.35	117.875	108.25	118.3	88.85	106.9	89.675	92.2	91.325	138.5	96.725	109.725	90.75	114.8	130.625	93.5	92
APIP	153.1	113.5	67.4	112.6	80.3	172.6	128.8	65.2	142.8	153	110.4	181.6	255.5	121.6	165.9	125.2	117.4	158.9	162	131.1
APLNR	28.8	12.8	35.6	11.7	14.6	15.7	20.4	37.3	11.4	74.3	248.7	85.8	20.2	217.6	65.3	146.4	89.4	23.8	154.8	128.7
APLP1	3.3	3	3.7	6.1	4.8	4.6	5.7	10.7	3.5	5.9	5.1	3.3	5.7	6	4.2	6.6	5.8	3.1	4.1	6.9
APLP2	2079.6	1809.56	1525.36	1378.9	898.871	1014.01	639.643	855.986	1056.07	911.014	1149.13	2514.13	2715.31	1790.06	2410.96	1825.37	1880.27	1749.2	1741.66	1532.17
APMAP	459.5	267.3	351.1	414.4	430.8	357.8	431	322.1	502.2	478.7	400	491.2	518.1	355.1	484.7	305.4	486.3	563.2	425	451.2
APOA1	6.5	5.95	32.8	7.1	4.2	15.15	7.4	39.8	5.85	10.75	20.35	12.75	4.75	31.85	8.4	18.55	3.4	4.7	9.5	20.5
APOA2	9.05	16.15	15.35	10.9	4.7	4.55	3.45	12.25	12.6	15.8	15.85	14.7	12.7	14.5	10.85	17	3.15	6.2	10.3	30.55
APOA4	2.4	13.7	2.9	2.7	5.6	5.9	3.9	4.4	6.6	5.4	8	5	5.8	3.5	3.3	11.8	7.4	2.8	5.9	26.8
APOB	52.5	89.1	168	121.3	83.7	213.2	54.8	89.1	110.8	85.4	20.7	37.9	50.8	49.6	39.5	51.3	68.2	48.9	36.8	109.7
APOBEC1	28.4	47.9	53.9	34.6	60.7	48.9	44.2	64.5	41.9	54.9	35.3	13	54.6	47.8	8.5	52.4	47.6	44.2	36.3	57
APOBEC2	45.1	44.1	58.5	49	37.2	52	48.5	122.8	42.6	83.7	38.4	66.6	62	24.2	45.7	56.7	46.6	41.4	41.8	81.3
APOBEC3B	30.4	16.4	4.4	16.4	18	32.1	26.5	15.1	19.8	55.4	81.1	15.5	64.4	35.5	43.6	20.8	44.3	7.5	48.6	28.5
APOBEC3C	55.6	75.5	87.4	96.3	70.2	54.4	62.3	151	134	86	147.9	140.6	304.3	120.4	84	81.4	120.9	136.1	96.1	181.7
APOBEC3F	4.8	7.8	5.1	9.7	1.5	4.4	3.6	4.9	2.3	4.2	14.4	12.4	31.2	7.1	2.8	11.2	29.9	2.6	23.3	41.3
APOBEC3G	25.8	45.2	35.45	20.45	31	37	37.75	11.95	34	48.3	71.65	47.4	64.55	39.2	33.65	34.2	31.7	41.1	52.15	93.95
APOBR	36.1	48.4	47	43.3	16.4	19.1	19.7	15.9	51.5	19.9	29.2	14.2	23.7	8.9	7.6	40.8	40.9	27.2	36.9	11.3
APOC1	466.8	487.35	685.45	447.8	873.85	451.7	376.3	398.55	225.7	213.7	1146.8	1211	950.65	299.15	1133.85	136.85	1151.25	1178.95	543.25	254.9
APOC3	3	1.8	12.6	4.1	5.2	9.9	9.5	13.5	8.3	7.2	7.6	4.1	7.5	7.2	6.8	7.2	8.5	13.1	5.7	7.5
APOD	234.3	2998.1	8413	622.9	4218	8245.2	9351.3	3580.6	5070.2	4070.9	171.5	115.2	441	476.7	92.3	423.7	111.6	96.9	188.7	173.5
APOE	444.767	498.233	1212.37	434.667	962.1	359.867	777.8	997.833	734.367	596.167	1667.77	3213.4	1500.47	587.667	2324.1	438.667	2630.57	2661.13	1264.43	1615.6
APOF	13.1	5.1	5.9	3.6	1.7	1.4	0.8	12.6	1.9	2.7	7.2	7.2	1	7.5	11.3	3.7	1.7	1	16.3	15.8
APOH	37.7	43.7	35.1	9.2	49.7	10.3	30.7	14.6	38.9	14	10.4	12.1	8.5	8.9	10.6	7.9	41	35.8	16.6	13.2
APOL1	106	74.6	76.5	87.6	65.7	36.6	108.9	88.6	58.8	144.1	201.1	149.1	38.2	170	112.7	192.5	191.9	120.6	135.4	82.7
APOL2	55.1	33.5	39.65	51	16.7	17.15	23.5	47.95	46.7	43.9	103.7	46.8	53.6	87.2	38.15	62.25	80.9	29.8	46.85	62
APOL3	162.8	221.5	178.2	235.5	238.4	202	315.8	207.6	266.1	290.6	339.2	265.7	174	321.2	213.4	402.3	314.4	195.1	265.4	246.6
APOL5	9.5	8.9	12.2	6.8	7.2	9.8	9.5	11.8	10.2	10.5	15.7	12	9.7	11.8	17	11.4	12.4	9.8	8.7	12.1
APOL6	18.4	50.3	98.9	39.7	83.9	167.1	127.7	113.3	63.6	137	78.8	87	77.5	95.8	132	127.9	22.8	124.9	135.5	134.1
APOLD1	467.8	342.2	409.4	822.6	722	1050.2	579.7	1192.7	678.2	709.6	143.3	46.4	43.2	90.2	7.5	82.5	75.2	86.6	126.4	74
APOM	75.5	51.55	67.7	79.7	106.5	78.15	104.2	68.55	87.55	120.4	90.85	103.3	86.5	64.1	81.1	94	120.2	108.95	102.15	136.2
APOO	99.1	66.4	80.6	127.1	80.2	73.8	119.9	93.3	61	142.2	125.1	104.6	69.7	91.3	114.5	107.4	82	96.6	91.9	114.3
APOOL	75.4333	60.3333	66.3667	72.2333	51.8333	73.9333	86.8667	54.5667	66.2	79.4	52	74.4667	62.4333	63.8333	89.0667	70.4333	71.7	83.4	79.1333	84.8667
APP	1175.53	688.967	1167.43	1242.7	684.267	1337.23	776.8	657.6	889.3	521.633	536.667	826.033	965.467	660.033	1265.3	398.2	1042.37	914.733	904.7	972.967
APPBP2	90.2	84.85	111.875	73.25	79.55	117.225	68.05	52.05	101.925	100.1	88.5	83.425	107.175	96.825	99.375	69.6	77.55	84.075	104.475	87.625
APPL1	171.7	93.6	88.2	111.3	98.2	121.6	57.4	82.7	77	129.1	122.6	181.8	170.2	96.2	113.1	81.1	158.2	113	118.8	136
APPL2	43.6	88.8	112.9	58.8	80.1	71.5	54.2	58.5	135.4	92.3	120.7	99.6	60.1	90.3	89	77.4	136	149.6	89.9	99.6
APRT	140.7	179.95	139.7	299.3	131.15	81.05	261.5	128.1	216.05	160.1	124.5	185.45	180	191	184	170.95	150.75	206.25	155.6	146.2
APTX	175.4	122.4	165.3	131.6	84	136.2	142	121.2	97.5	182.1	136.1	154.6	105.9	126.4	120.6	117.2	146.7	136.3	134.3	178.5
AQP1	869.55	455.05	643.95	784.2	1434.7	608.9	1792.35	1358.95	1051.2	861.95	1196.8	1290	1113.65	2744.85	954.65	2454.95	1091.7	979.75	1419.35	1371.75
AQP2	73	100.9	132.2	107.8	123.8	111	179.1	134.9	122.8	133.8	120.1	134.7	82.6	80.6	97.3	104.5	84.8	134.9	138.3	175.7
AQP3	38.2333	98.6333	162.6	24.1	62.0667	58.2667	58.9667	89.6	50.5667	86.4667	106.933	105.6	101.667	62.1333	48.3667	50.2333	77.7333	67.7667	67.1667	67.9
AQP4	10.8	2.5	9.375	15.025	3.075	3.8	3.675	4.025	3.9	11.175	13.325	10.95	6.875	6.8	4.8	7.8	6.025	4.75	7.75	7.475
AQP5	5.1	9	3.2	5.3	2.3	1.7	2.8	4.1	6.2	7.3	4.9	6.1	2.4	4.6	10.6	5.6	2.3	1.8	4.5	16.1
AQP6	19.4	33.45	31.35	36.9	21.5	9.6	15.9	30.6	10.15	49	26.55	24.3	28.45	40.6	17.6	45.15	29.1	24.5	26.55	58.25
AQP8	43.8	32.8	14.6	56.9	42.8	43.9	26.6	43.6	33.3	52.9	18.9	7.9	42.9	17.2	15.1	11.6	30.9	15.1	18.4	65.4
AQP9	41.9	6.8	18.8	52.8	4.8	7.4	44.3	10.1	4.9	6.2	8.7	70.5	10.2	4.4	58.6	22.6	112.5	207.7	16.6	12.3
AQR	163.7	116.3	164.35	95.45	137.55	103.35	157.25	123.9	120.7	145.05	115.25	152.8	56.45	110.5	107.85	123.7	109.55	132.15	149	164.1
AR	48.85	37.55	65.55	45.85	79.35	82.45	62.75	68.1	91.9	110.55	81.45	63	44	35	52.5	48.25	38.35	60.5	58.2	114
ARAF	261.3	306.9	285.4	276.9	306.8	151.8	322.5	405.9	258.4	326.8	236.6	212.5	224.6	222	212.5	240.7	269	171.9	264.6	303.5
ARAP1	80.5	94.75	104.7	93.4	122.6	87.4	95.15	130.05	122.35	109.45	228.5	137.55	122.55	150.9	116.3	123.55	183.65	169.05	158.75	256.2
ARAP3	97.2	47.9	103.2	77.7	101.7	126.3	118.2	157.6	138.2	120.4	149.1	85.2	121.5	100.8	75	70.9	100.4	110.9	138.1	174.8
ARC	10.4	73.6	42.1	186	105.4	60.8	6.4	682.6	48.5	6.7	5.4	3.2	5.6	6.4	7.8	16.1	8.1	3.5	5.2	12.8
ARCN1	645.5	450.9	472.4	689.1	479.8	254.3	460.8	344.3	396.8	513.3	608.1	572.9	544.6	408.5	601.5	531.7	373.8	445	365.1	401.3
AREG	27.4	20.3	27.7	57.55	15.6	28.95	14.05	27.8	14.8	31.95	22.7	4.95	7	7.9	6.9	12.75	10.6	0.75	9.55	17.05
AREL1	115.1	98.7	96.3	126.4	67.9	59.7	57.8	56.9	69.6	99.7	119.9	118.2	78.3	95.6	78.2	77.6	83.1	118.4	116.2	124.7
ARF3	271.133	306.9	244.033	368.733	321.8	210.433	340.233	310.1	357.667	329.833	297.8	394.2	340.7	326.867	369.333	386.1	366.767	431.1	419.9	376.367
ARF4	1182.15	912.9	757.8	1022.05	1072.2	1256.2	1108.55	895.45	759.05	824.5	1088.75	973.55	677.6	1250.1	1136.55	1018.7	1170.4	1036	717.3	568.9
ARF5	227.7	184.5	187.6	200.8	210.6	133.9	244.3	299.6	322.4	260.5	265.2	202	254.5	285	251.6	176.5	370	259.7	280.5	364.2
ARF6	495.05	381.15	513.8	575.9	387.05	479.05	406.55	640.3	416.25	370.3	400.85	489.05	515.15	439.8	512.9	560.15	314.2	356.7	358.3	271.55
ARFGAP1	116.3	98.8	103.6	142	220.7	113.7	144.6	171.7	145.5	188.3	190.2	118.1	142.1	94.8	105.9	120.8	191.2	157.7	150.9	244.5
ARFGAP2	235.3	401.4	382	372	367	191.5	218.1	424.2	501.8	379.2	282.8	278.3	247.9	284.2	321.3	271.6	305.3	325.7	325	431.9
ARFGAP3	378.9	271.7	247.2	240.9	213.9	331	309.8	269	287.8	274.6	275	254.9	431	168.6	271	204.2	201.4	215.4	164.6	163.6
ARFGEF1	170.033	140.067	150.333	101.833	129.567	110.333	123	98.9	116.633	146.967	148.033	170.967	78.2333	135.5	157.633	145.533	169.167	144.267	137.233	156.1
ARFGEF2	80.7667	92.5	81.5667	93.3667	93.7333	110.8	64.8333	44.2333	90.3333	79.8333	87.5	93.3333	54.6667	75.7	86.4667	87.8333	90.0333	95.3667	74.9	65.6333
ARFIP1	159.7	99.7	103.15	84	74.3	92.3	106.55	39.75	107.8	80.15	113.05	172.95	143	112.25	150.2	129.5	123.85	116.4	116.05	106.8
ARFIP2	118	219.1	200.3	271.2	401.3	177.9	289.1	361.2	260.3	317	308.1	164	189.8	199.6	144.3	183.9	177.8	216.9	229.7	233.4
ARFRP1	68.75	107.3	93.3	92.35	81.6	58.35	140.35	84.5	112.35	104.6	81.2	124.55	86.65	116.85	78.2	75.7	117.35	91.3	123.75	152.4
ARG1	3	13.6	28	27.1	26.6	21.7	36.3	30.9	34.4	13.5	35.7	19	22.2	32.7	25.4	25	26	9.2	18.1	25.4
ARG2	61.75	54.85	66.9	49.95	65.6	61.5	44.2	81.65	48.7	55.75	37.05	53.3	52.5	58.85	53.85	57.25	60.9	33.85	40.3	45.85
ARGLU1	202	309.2	314.2	354.7	783	476.5	418.1	459.8	499.7	390	364.3	203	280	286.8	254.4	177.1	496.3	436.6	373.7	308.6
ARHGAP1	305.067	358.567	486.333	391	577.267	400.333	396.067	762.633	533.033	486.833	516.833	618.133	699.3	496.333	414.8	466.167	482.367	449.333	548.333	773
ARHGAP10	177	157.8	167.7	142.7	94.9	145.2	98.8	139.5	244.4	247.1	130.9	78.5	127.4	93.8	69.8	67.2	116.1	97.9	133.7	114.6
ARHGAP11A	28.1	10.5	4.5	13.9	1.8	4.2	1.8	4	2.6	22.9	13	16.9	3.5	9.3	13	14.8	4	1.9	16.6	20.3
ARHGAP12	65.1	108.8	140.7	122.2	82	118.7	49	69.7	98.3	91.4	125.9	157	81.2	177.3	169	154.5	82.8	96.8	156.2	101.5
ARHGAP17	155.8	343.7	382.6	486.5	358.8	472	180.9	435	410.2	341.4	423.9	360.5	374.4	416	436.8	382.7	384.7	218.5	453.2	300.2
ARHGAP19	22.6	21.7	22.85	26.85	18.5	8.4	7.35	9.8	13.75	11.65	16.55	16.55	7.65	30.95	21.15	17.95	7.1	18.65	21.55	18.05
ARHGAP22	51.5	84.6	61.5	15.3	9.5	11.7	43.5	28.4	22.8	76.5	82.4	144.5	77.9	63	71.9	61.8	133	130.3	90.7	94.9
ARHGAP24	86.8	82.6	113.6	67	54.4	104	43.1	99.6	129.4	75.1	48.6	78	70.8	65.1	65.4	91.6	84.7	69	105.4	103.8
ARHGAP25	72.65	37.45	29.8	49.45	36.15	36.6	28.5	31.65	51.45	57.75	101.35	122.45	108.2	82.7	190.15	93.6	87	141.15	119.8	60.55
ARHGAP26	52.5667	36.9333	43.2	42.3333	44.3667	42.2667	53.7667	41.6	30.1667	64.7667	34.1	29.3333	46.9667	34	16.9	40.0667	28.5667	23.8	27.9667	30.8667
ARHGAP28	25.85	28.95	16.55	53.8	20.9	18.6	44.8	45.25	21.6	30.85	58.95	88.85	29.25	53.35	59.4	53.85	43.3	26.95	49	51.65
ARHGAP29	260.7	180.5	307.6	282.6	827.1	794.8	837.7	688.9	345.8	302.3	384.6	234	209.6	416.1	197.3	258	245.7	177.1	316.6	252.2
ARHGAP32	24.75	67.55	48.6	21.35	61.2	44.95	43.2	64	36.45	51.2	68.6	42.6	53.35	38.05	27.65	44.3	25.1	35	34.55	57.4
ARHGAP33	14.85	17.55	46.5	20.85	24.8	42.5	33.4	50.7	37.5	16.15	40.9	14.85	28.4	11.15	39.25	29.8	28	28.25	17.35	21.05
ARHGAP35	31.2667	54.4	50.9333	36.9667	61.3333	36.8667	52.5	54.5	40.4667	59.0667	44.4667	64.8333	62.5333	42.7	57.9	61.0333	31.1667	50.4667	50.9	62.1
ARHGAP4	27.3	24.3	7.9	32.7	12	7.3	8.8	36.8	17.3	11.1	37	25.1	18.3	34.6	33.9	9	76.2	40.1	52.2	52.4
ARHGAP44	46.95	43.65	81.45	82.35	120.9	67.8	47.95	113.45	58.7	105.9	60.7	35.4	65.7	37.35	68.9	68.15	60.1	53.55	44.2	79.25
ARHGAP5	127.5	208.4	278.8	273.6	217	271.4	156.8	165.8	210.4	184.2	178.2	286.4	98.1	171.4	270.2	94.7	235.2	167.4	226.8	277.3
ARHGAP6	242.2	251.5	263.4	236	99.9	253.2	26.65	61.45	349.55	204.2	46.25	55.95	81.45	80.9	38.9	57.8	55	43	61.85	49.5
ARHGDIA	175.875	190.375	222.925	380.425	519.425	195.225	694.4	590.925	539.825	424.05	189.7	208.65	218.15	199.3	219.525	288.35	447.525	499.025	244.975	267.175
ARHGDIB	1465.6	675.2	751.7	734.1	461.4	814.9	575.1	622.7	977.2	739.6	937.8	1362.8	627.7	1064.4	1493.8	1337.9	1216.9	1504.5	1257.4	958.5
ARHGDIG	35.7	35.5	29.7	38.8	59	38.5	47.4	34.4	59.6	47.5	31.5	16.6	45.3	49.2	47.1	47.1	49	44.2	39.7	44
ARHGEF10	126	62.4	97.7	93.5	115.45	109.45	79.95	117.85	85.25	87.4	143.65	128.35	180.15	177.35	50.25	137.55	96.5	82.95	126.1	151.95
ARHGEF10L	182.6	233.2	225.9	198.1	208.5	245.9	121.2	194	250.5	189.7	286.2	187.2	322.1	212.8	141.8	272	265.4	129.9	278.8	192.9
ARHGEF11	77.85	88.55	64.85	80.3	159.15	70.85	151.5	128.05	121.75	129.3	61.8	107.8	65.9	61.2	66.15	80.6	142.3	145.8	129.15	151.9
ARHGEF12	112.975	161.05	163.85	199.175	201.875	276.675	104.6	243.95	180.225	156.125	165.4	166	116.45	170.875	132.6	173.875	189.075	154.675	173.575	142.85
ARHGEF15	60.55	69.3	111.4	79.5	143.6	93.95	160.4	251.85	82.75	103.45	112.5	71.4	86.55	93.8	58.75	84	93	81.75	112.5	124.95
ARHGEF16	67.5	61.8	33.6	57.1	67.4	50.7	22.6	83.2	63.4	25	77.8	60.4	48.7	47.3	67.6	57	92.1	58.5	63.8	110.8
ARHGEF17	41.5	57.8	165.6	106.9	150.2	72.7	87.4	210.2	98.6	88.7	101.1	150.9	51.1	105.4	56.7	71.7	90.3	47	120.7	131
ARHGEF18	156.8	181	168.3	213.2	223.7	185.5	115.1	143.8	226.4	186.3	301.5	256.5	329.5	251	292.2	252	213.5	295.9	311.4	241.9
ARHGEF2	183.65	204.25	290.25	269.85	318.9	258.65	495.2	281.7	369.65	271.8	260.8	235.15	198.4	235.05	201.15	203.65	284.55	278.6	322.5	333.6
ARHGEF26	21.5	20.3	25.7	28.3	11.9	1.3	2.1	12.5	5.7	15.3	2.9	7.2	1.1	5.2	26.3	10.8	22.2	2.9	4.8	3.9
ARHGEF28	30.5	34.5	39.9	25.9	39.2	15.3	12.3	51.6	20.1	58.5	19.8	6.9	30.6	23	8.8	24.7	11	42.2	59	14.9
ARHGEF3	262.9	208.4	309.2	265.4	318.1	678.3	214.1	250.6	364.2	173.3	400.8	236.5	392	403.6	331.3	408.6	349.2	470.2	401.9	163
ARHGEF38	63.4	55.4	88.6	105.6	105.4	89.2	120.4	170.5	77.3	126.6	101.5	69	75.6	107.3	70.5	85.4	65.6	73.8	86.3	117.2
ARHGEF4	6.5	22.5	27.2	4.4	6.6	5.5	4	13.5	7.6	33	9.2	2.3	4.3	7.5	5.5	8.7	10.1	7.7	9.1	8.9
ARHGEF40	112.7	139.35	127.2	190.4	124.5	191.05	61.6	125.1	130.65	125.7	279.55	245.45	417.85	245.85	210.65	248.55	269.15	220.4	286.6	203.35
ARHGEF5	19	21.6	59.7	12.4	25.9	15.5	22.7	34.9	56	20.8	48.5	16	18.2	19.8	17.1	50.1	42.9	15.6	47.8	28.8
ARHGEF6	150.1	94	181.2	138.4	119.3	192.4	82.5	158.7	148.4	190.9	361.7	356.5	298.2	223	332	290.8	201.3	188.1	302.4	246.6
ARHGEF7	141.85	157.45	221.75	207.6	318.2	249.45	163.7	264.85	181.55	212.8	222.25	151.65	187.75	181.8	151.8	178.95	155.35	164.6	213.8	207.3
ARHGEF9	48.15	28.9	28.15	33.8	21.55	44.3	11.25	14.55	41.95	23.35	50.35	76.3	59.65	50.75	69.9	54.3	64	62.3	65.15	57.65
ARID1A	168.075	210.225	211.375	245.075	316.825	289.45	294.05	278.05	297.225	301.925	300.775	236.6	200.35	235.25	205.825	207.45	319.475	297.9	286.35	248.35
ARID3A	27	39.4	21.9	44.5	58.3	78.3	64.6	32.3	68.9	42	24.4	8	46.9	36.2	7.5	37.8	32	45.1	49.9	58.9
ARID3B	15.4	9.1	13	8	4.9	6	6.7	11.7	8.8	12.6	23	15.2	18	14.5	17.6	8.3	8	10.4	13.1	12
ARID4A	56.6	135.2	149.1	104	91.1	108.5	52.8	50.3	85.2	94.4	83.8	84.2	39.8	67.4	62.5	80.1	63.6	55	79	86.6
ARID4B	154.75	172.65	179.8	135.4	199.1	253.15	139.65	154.4	211.8	153.05	153.6	138.3	120.45	141.65	165.15	132.1	167.45	146	156.85	155.6
ARID5A	39.1	46.4	54.1	95.6	209.9	60	142.6	329.4	98.6	74.6	23.9	61.6	32.4	32.9	60.6	36.4	115	54.2	77.3	29.8
ARID5B	911.8	2068.4	2417	1491.9	1421.4	1634.7	1597.2	1922.4	1498.1	1497.7	532.3	703	264.4	755.4	741.7	506.8	876	667	595.1	565.1
ARIH1	124.7	208.775	179	225.2	229.65	188.65	131.825	219.7	148.35	154.2	114.325	154.325	89.6	130	138.375	124.4	109.275	119.7	136.4	147.8
ARIH2	77.825	71.775	82.8	69.075	112.275	51.075	71.35	77.475	74.275	101	87.225	64.15	81.825	90.6	59.8	63	62.775	81.025	89.25	81.75
ARL1	203.233	126.233	138.733	164.133	161.867	178.9	161.333	147.367	151.933	199.4	192.2	193.367	140.267	191.833	210.167	238.6	220.367	223.067	217.633	215.067
ARL14	0.9	6.5	9.7	18.3	1.9	1.6	1.5	1.5	1	5.5	6.2	12.5	6.5	17.5	6.9	15.1	0.5	0.9	4.9	11.6
ARL15	22.5	18.7	60.7	27.2	32.5	51	36.6	53.8	44.8	41.3	72.3	19.3	26.3	12.1	20.1	36.8	41.8	36	38.1	38.5
ARL2	563.3	580.5	315.9	614.9	434.4	176.5	490.5	503.6	597.5	449.1	371.1	486	860.4	511.2	494.4	806	479.3	409.2	592.2	523.7
ARL2BP	371.9	318.8	325.5	225.7	415	422.2	354.2	377.4	338.5	416	331.5	496.3	445.5	491.6	428.9	507.8	460.4	393.7	453.7	438.8
ARL3	201.95	104.3	163.45	155.45	98.7	121.1	81.2	95.2	124.6	118.25	107.65	113.95	98.6	153.55	126.95	164.05	113	105.55	133.4	132.2
ARL4A	100.5	252.3	232.2	235.8	318.8	537	249.3	203.8	227.5	257.7	153.3	96	80.5	98.2	98.5	81.3	119	35	170.6	131
ARL4C	148.45	183.65	183.8	273.175	163.4	148.625	168.275	150.65	219.7	214	159.325	81.575	60.525	77.725	76.625	65.375	90.275	150.025	66.975	72.15
ARL4D	199.7	128.05	167.3	105.85	148	144.2	118.15	130.2	127.6	275.55	94.95	91.95	104.85	137.3	91.65	102.55	95	144.5	182	115.15
ARL6IP1	614.8	454	454.1	359.3	234.6	451.8	153.5	143.5	326.7	276.5	348	393.9	334.7	390.2	465.9	431.3	398.5	339.2	351.6	164
ARL6IP4	144.35	206.4	246.6	235.7	289.15	123.85	251.95	251.45	256.15	290.55	236.15	187.35	230.05	209.65	210	241.2	367.4	232.55	313.15	323.5
ARL6IP5	1984.65	1158.15	2254.8	1465.4	979.4	1883.8	778.9	844.1	1543.1	1119.35	1621.15	1997.2	1516.75	2551.8	2474.25	2407.95	1721.65	1651.75	1603.25	1463.05
ARL8B	732.4	863.7	695.4	640	717.4	683.8	580.4	466.2	599.2	634.8	657	689.3	626.4	640.9	618.6	610.4	591.1	666.7	662.8	518.9
ARMC1	148.8	109.1	91.1	73.5	129.3	147.1	127.3	113.2	111.1	147.7	115.2	106.6	106	126.2	112.8	128.8	100.1	120.9	93.9	155.2
ARMC4	49.7	47.1	68	23.1	85.2	19.4	55.2	27.3	55.4	116.6	62	57.5	28.4	58.2	22.3	68	140.1	20.6	87.6	129
ARMC6	46.4	51.6	36.7	50.2	21.3	25.7	50.7	57.1	46	80.6	62.2	54.6	47.4	52.3	28.8	41.2	54.2	23.4	57.3	79.3
ARMC7	28.7	32	73.2	70.3	34	39.2	34.6	18.1	30.1	75.4	89.9	42.2	85.7	48.3	50.2	58.9	111.7	31.5	65	83.4
ARMC8	165.533	82.6	79.5	78.0333	68.4333	92.9333	48.9667	57.4667	68.3667	118.233	98.5	73	73.4333	77.8667	83.8	84.8333	91.9667	96.4333	86	109.4
ARMC9	17.2333	12.1667	17.1667	5.16667	11.2333	9.36667	20.0667	11.0333	8.33333	10.8667	31.4	21.3333	17.6667	27.6	17.9333	10.9	24.2667	12.1	14.5	18.7
ARMCX1	539.7	449.6	525.1	270	298.8	815.8	168.6	179.8	536.8	262.2	244.3	268.3	545.9	282.6	289.3	279	248.2	217.7	336.7	198.2
ARMCX2	145.5	167.5	229.9	142.5	106.9	263.6	125.4	109.8	214.5	156.7	284.8	358.2	323.3	326.3	363.4	150.6	321.6	448.1	315.9	263.1
ARMCX3	303.4	241.3	204	217.1	190.6	479.5	217	281.1	340.4	254.8	357.3	320.6	404.5	232.3	242.6	238.6	162.7	301	211	213.6
ARMCX4	2.2	7.7	5.9	3.4	8	8.7	6	7.3	5.1	11.9	9.1	3.2	18.6	7	4.6	5.2	4.7	6.5	9.8	25.7
ARMCX5	120.6	113.3	96.8	104.6	99.5	125.8	76.7	51.1	96.5	103.6	103.8	70.2	72.5	109	108	98.2	90.5	104	87.8	95
ARMCX6	330.95	190.4	303.75	261.55	181.95	327.45	270.95	301.55	226.85	311.4	449.5	344.95	330.9	394.8	323.85	346.6	263.7	340.95	357.8	343.75
ARNT	80.6	85.6333	52	24.0667	50.6333	43.7	37.8667	31.6	61.2667	32.3667	32.3	70	51.8333	52.3333	47.4667	81.2333	43.4667	41	47.9333	58.2333
ARNT2	7.4	4.8	10.3	5.9	5.2	8.3	49.3	10.3	9	6.5	26.6	15.8	20.8	19.5	5.2	20.2	2.7	4.7	7.4	9.9
ARNTL	109.4	138.75	61.5	135.5	84.75	85	45.8	86.8	139.35	79.95	14	27.25	21.95	86.9	53.6	38.75	21.35	36.3	36.95	20.1
ARNTL2	8.1	37.9	66.2	70.8	95.3	56	91.1	86.4	43.7	67.4	40.8	94	78.4	103.6	69.5	67.8	75.4	61.1	85.1	111.8
ARPC1A	203.1	144	270.2	162.1	168.5	157	221.8	176.1	252.1	268.8	326.3	405.2	555.8	402.2	364	428.7	378.9	278.4	411.5	432.5
ARPC1B	657.9	484.9	418.8	672.4	667	491.2	955.5	603.7	821.1	770.2	914.9	1100.2	1766.4	1230.6	1310.2	1145.3	1226.5	1645.2	1378.5	1195.3
ARPC2	1071.67	690.067	535.633	653.467	806.533	1077.23	921	589.633	902.567	818.933	870.333	989.5	1392.4	895.533	1018.97	1106.63	1309.37	1457.93	1042.37	955.167
ARPC3	682.6	411.1	244.3	308.8	398.7	469.3	478.9	297.8	602.9	424.1	410.3	489	339	435.5	505.8	509.7	715	941.2	580.9	409.6
ARPC4	26.1	67.95	22.65	90.5	92	9.4	133.1	123.45	120.7	59.8	90.35	55.7	134	85.25	34.6	69.8	225.45	101.25	123.6	103.7
ARPC5	1208.9	713.9	553.2	515.7	555.5	893	751.9	410.1	572.6	727.6	716.8	1354.6	1511.9	1014.5	981.6	1451.7	1220.3	1624.6	1015.1	1016.7
ARPC5L	324.6	184.1	168.5	199.8	277.4	223	276.3	544.2	219.1	200.4	307.3	236.1	287.1	191.8	243.6	185.5	158.5	261.8	231.7	211.3
ARPIN	39.4	52.4	67.6	51.8	70.6	67.2	88.4	46.1	46.1	57.5	74.3	48.8	98.8	63	45.9	73.4	75.2	44.6	42.3	85.6
ARPP19	305.967	293.867	252.5	234.167	284.533	301.133	273.867	247.133	223.167	299.833	278.767	275.967	247.533	281.267	237.667	332.8	247.9	254.6	303.067	252.4
ARPP21	5	4.7	7.3	5.3	3.3	10.3	14.3	10.8	6.8	14.6	6.4	4.9	5.8	8.7	6.6	3.2	6.7	2.3	6.4	16.4
ARR3	55	44.4	80.5	60.7	66.2	60.6	49.2	118.7	59.5	114.8	97.8	54.5	99.6	71.9	64.1	54.3	122.8	53.3	64.7	112.6
ARRB1	34.15	49.7	74.2	79.1	122.075	85.675	40.45	107.975	57.75	80.975	123.175	222.625	195.825	175.575	144	131.775	186.45	134.7	255.55	206.425
ARRB2	159.6	224.4	172.8	169.2	73.7	18.9	58.4	15.9	343.5	154.1	165	406.5	236.8	215.9	326.1	270.9	264.8	474.3	234.9	151
ARSA	27.7	70.8	70.8	54.8	34.9	53	69.5	79.2	60.1	72.7	85.5	109.6	98.7	102.2	37.5	41.9	57.2	112	99.2	76.2
ARSB	57.1	35.5	52.6	60.3	47.6	53.6	55.3	32	59	74.4	73.5	95.9	62.1	47.3	57.2	66	112.9	114.8	94.8	118.9
ARSD	2.75	15.65	23.6	16.5	3.85	4.65	3.75	7.7	2.8	7.75	9.2	4.15	6.1	9.5	4.95	7.85	5.25	4.85	3.8	7.5
ARSE	59.1	51.4	70.8	44.5	35.6	38.8	45.7	97.9	27.9	86.8	80.8	36.4	75.3	74.7	76.4	83.1	42.3	49.2	55.1	90.4
ARSF	20.6	14.5	33.4	35.5	46	23.3	33.4	61.7	16.8	43.6	23.4	64	7.3	41.5	47.5	28	10.6	12	17	17.6
ARSJ	78	26.5	51	37.8	22.7	46.6	72.4	4.2	32	32.6	31.2	39.1	56.7	48	31.3	39.1	52.8	46.8	45.7	32.3
ART1	65.5	60	91.6	84.7	101.8	81.2	85.4	112.6	78.9	122.9	93	106.2	77.4	85.1	57.7	64.7	94.9	82.3	110.4	135.6
ART3	21.5	18.3	6.1	35.9	18.5	34.9	40	36.4	12	53.9	52.8	36	37.1	22.3	31	26.7	5.2	24.5	41.5	80.1
ART4	16.9	11	34.8	45.8	18.3	23.9	20	35.4	17.8	49.5	39.9	31.7	19.5	20.7	28.7	14.9	36.5	10	27.7	54.4
ARTN	27.4	14.3	47.4333	22.8333	20.7	16.7667	22.6333	32.1667	15.2333	23.4667	17.4333	18.5667	20.8667	32.1667	18.4667	22.9667	28.8333	20.4	16.7667	16.0333
ARVCF	51.9	58.05	65.95	24.9	75.5	80.35	87.3	34.4	53.7	48.25	145.45	122.1	180.85	94.7	95.9	80.75	115.65	70.65	86.55	127.7
ASAH1	1202.38	894.975	527.975	737.925	627.125	815.525	533.875	398.225	854.6	812.725	765	1115.1	1252.85	690.275	1133.33	781.35	901.5	1247.12	862.6	825.225
ASAP1	85.3	96.8	71.1	126.6	226.3	144.7	189.3	135.8	115	169.8	137.6	182.9	104	147.6	94.8	115	105.7	203.3	164.7	173.9
ASAP1-IT1	20.4	23.6	105.1	96.4	87.6	61.7	8.6	139.6	7.6	70.4	149.7	45.9	57	55.4	12.8	28.3	9.7	8.5	45.7	110.5
ASAP2	142.6	321.3	401.7	269.2	258.4	637.3	148.7	290	262.1	269.5	449	343.9	311.9	606.9	446.2	567.8	470.3	401.3	484.4	450.2
ASAP3	122.15	213.75	174.2	189.75	169.6	137.8	45.15	147.3	208.4	160.05	201.4	114.1	136.55	166.3	106.8	145.25	166.35	145.8	105.7	202.35
ASB1	40.95	60.7	88.8	70.5	76.7	58.15	55.55	81.25	49.55	92	100.05	91.9	101.95	79.15	82.7	86.4	104.8	81.7	119.55	151.45
ASB13	259.2	331.4	471.3	356.2	150.6	192.5	96.1	29.7	450.7	224.7	176.3	145.1	270.2	219.1	200.2	153.8	196.4	127.8	167.9	189.2
ASB4	12.4333	21.6667	8.4	23.7	8.26667	7.9	16.0333	6.33333	2.7	7.5	17	12.4	12.5	6.23333	13.4667	28.7667	2.9	2.73333	10.4667	10.7333
ASB6	14.5	55.9	67.5	30	48.4	12.3	16.6	31.6	41.5	10.1	13.9	12.8	59	42.6	20.9	11	31.8	11	12.7	11.5
ASB7	40.9	39.1	27.5	36.3	11.9	32.4	13.5	17.4	25.4	50.2	39	2.3	21.5	11.7	35.3	11.9	50.1	29.9	22.1	56.3
ASB8	80.4	53.4	61	45.3	34	85.8	50.4	70.7	57.4	77.2	81.1	46.7	31.6	53.1	52.4	53.5	47.4	39.6	48.6	47.2
ASB9	12.4	32.3	26.8	35.1	33.8	36.8	32.8	18.1	26.4	46.1	72.4	15.2	20.3	24.6	25.7	42.2	27.3	24	31.2	54.9
ASCC1	172.6	208.4	183.3	171.7	129.4	142.4	184.7	156.7	107.7	239.1	145	88.8	103.7	144.4	137.4	160.8	55.7	218.1	171.9	213.4
ASCC2	49.6	73.9	83.2	99.6	35.4	14	69.4	43.7	81.9	35.1	65.6	59.4	69.1	54.4	39	66.3	66.9	53.3	45.9	68.2
ASCC3	117.6	55.5	89.7	112.9	143.7	107	179.7	87.8	107.9	110.2	119.9	132.7	45.4	95	107.4	82.6	197.4	171.6	103.5	66.9
ASCL1	9.375	10.15	28.725	14.025	9.95	7.325	14.25	14.45	7.925	16.325	13	10.475	15.075	7.125	16.875	19.6	31.35	26.875	12.125	39.275
ASCL2	0.2	0.6	2.5	1.5	0.3	0.2	0.3	0.7	0.4	0.5	1.4	0.2	0.3	2.1	0.4	1.1	0.3	0.3	0.1	0.4
ASCL3	17.7	9.2	82.9	30	49	17.4	69.2	51.7	8.4	77.3	15.8	15.2	22.5	25.7	8.2	59.1	43.3	59.9	29.3	79.6
ASF1A	146	64.15	104.6	66.65	34.75	80.95	55.6	30.15	75.95	52	73.9	117.6	202.75	95.2	125.2	119.1	92.45	102.85	108.75	85.1
ASF1B	46.4	67.2	116.4	51.2	108.1	129.7	151.2	105.2	88	139.1	104	85.7	59.9	72.6	72.1	76	127.7	124.2	125.1	179.8
ASGR1	18.2	12.2	10.4	15	5.4	4	14.4	32.1	18.6	8.2	11.4	28.8	4.9	3.2	7.7	15.6	5.3	8.6	7.8	11.6
ASGR2	4.3	6.1	8.8	7.9	5.9	6.9	8	15.3	7.1	11	16.7	7.6	8.6	7.7	9.9	8.8	6.2	9	8.3	17.9
ASH1L	77.9	59.9	118.3	93.3	146.8	116.1	144	139.1	124.5	179.8	136.1	148.3	94.8	113.9	124	107	144.4	119.1	123.6	190.1
ASH2L	298.4	314.9	278	293.2	280.1	306.3	242.9	224.9	314	368.1	349.1	438.2	243.6	372.8	296.6	421.9	305.2	416.4	360.3	412.3
ASIC1	11.8	15.9	43.8	57.3	41.05	26.5	14.85	46.35	24.55	23.1	32.45	18.15	12.25	22.55	11.6	44.95	25.65	9.9	27.1	13.95
ASIC2	3.6	5.1	9.4	4.9	8.4	4.7	10.1	10.9	9.2	11.6	12.4	5.2	5.7	37.8	10.7	39.1	28.2	5.6	11.7	10.5
ASIC4	10.9	5.5	26	15	8.4	8	16.9	14.9	33.9	22.5	10.3	7.7	10.9	14.9	21.5	11.3	10.4	13.3	15.1	23.8
ASIP	36.6	4.6	5.4	15.2	56.7	46.2	83.1	39.3	13.5	49.3	62.7	43	29.4	29.1	31.9	48.6	11.9	28.8	43.8	63.2
ASL	96.1	137.2	176.2	122.7	91.6	58.2	100.5	158.9	121.8	120.9	124.8	77.5	109.6	114	95	153.8	93.5	56.3	99.2	102.9
ASMT	5.6	9	3.65	8.45	6.45	4.8	10.75	4.7	3.25	11.75	9.65	3.25	7.3	20.1	2.35	8.5	3.6	3.6	4.2	5.8
ASMTL	310.2	233.533	215.7	215.467	145	121.067	151.033	196.4	248.867	173	189.4	169.467	430.467	191.2	186.667	161.767	210.033	209.267	197.567	188.9
ASMTL-AS1	1.7	2	3.3	2.6	2.3	1.8	2.6	3.1	1.9	3.3	3.5	1.9	2.6	3.3	2.8	4	2.6	2	2.1	3
ASNA1	214.7	265.3	175	268.7	161.5	104.2	155.8	123	211	256.6	230.9	263.7	270.4	206.4	238.2	295.8	182.7	197.5	221.1	282.4
ASNS	95.4	88.7	55.7	167.9	91.9	51	338.5	75.1	65.7	110.4	79.1	53	55.8	77.8	53	69.4	49.9	43.7	41.3	73
ASNSD1	298.4	350.6	318	314.3	352.3	365.1	231.4	197.5	278.8	248.8	232.6	178.1	108	196.3	244.1	154.7	187.6	202.5	188.4	168.6
ASPA	1.4	23.9	36.6	10.9	3	47	6.6	58.3	37.9	44.6	61.8	31.5	49	62.8	66.3	65.9	11	37.1	57	48.8
ASPH	195.9	119.8	216.775	201.3	201.75	262.975	108.4	105.275	178.525	171.1	107.55	190.9	356.025	119.45	235.375	173.125	125.4	169.8	169.025	151.55
ASPHD1	4.3	3.5	7	5.6	3.7	2.9	5.7	7.4	3.8	7.5	7.8	6.1	7.1	8.4	6.5	6.6	4.3	3.2	3.1	6.3
ASPM	1.7	1.7	4.5	1.8	1.2	5.2	0.8	1.6	1.5	3.2	36.2	20.7	2	31.7	5.1	3.6	5.3	3.6	6.8	1.6
ASPN	359.2	826.2	248.6	82.4	504.3	797.6	545	993.3	319.6	401.9	2548.7	239.9	155.8	3038.1	508	2929.3	1091.3	689.7	368.4	331.4
ASPSCR1	21	45.2	42.6	51.7	37.4	8	75.7	71.2	101.4	58	9.4	30	27.5	46.9	5.6	29.9	80	46.1	59.8	52.9
ASRGL1	44.4	77	58.1	82.2	168.5	131.3	270.5	44.7	78.2	110.5	22.7	157	69.2	100.8	78.2	20.5	104.5	22.6	34.5	96.4
ASS1	571.6	709.5	1132.4	1454.2	1502.4	1380.8	1483.4	1285.1	1470.9	892	637	531	835.7	458.2	549.9	448.8	948.7	603	746.2	568.7
ASTE1	64.7	9.4	79.1	33.9	13.2	22.9	7.1	9.7	22.3	19.6	88.8	61.9	106	70.8	68.9	58.9	40.7	36	76.7	32.6
ASTN1	27.2	5.2	21.8	12	11.8	6.6	9.2	27.4	6.6	31.5	7.6	21.7	12.6	7.4	3.8	9.1	4.4	16.1	6.9	32
ASTN2	27.05	21.2	23.5	7.3	3.8	8.1	12.25	4.1	11.3	26.3	22.6	21.05	14.45	12.5	26.45	13.25	9.9	19.1	29.95	26.35
ASUN	113.4	67.5	80.2	90.6	55	84.8	142.6	95.9	67.3	92.4	100.8	73.4	72.7	99.9	107.6	112.3	64.2	85.4	61.7	48.4
ASXL1	179.367	199.067	170.9	170.833	244.8	170.767	231.1	191.8	206.967	206.967	209.067	150.767	187.3	145.333	129.133	132.6	196.733	140.067	189	197.167
ASXL2	424.1	288.9	496.4	417.2	348.2	377.8	206.9	196.7	257.9	312.2	410	399.8	331.8	732.5	651.9	676	461.9	414	455.9	339.5
ASXL3	3.2	4	25.9	4.7	3	3.8	1.8	7.8	9.1	6.1	42.9	19.2	5.3	34.6	4.2	7.9	3.4	2.2	9.9	3.7
ATAD2	9.5	41.3	21.5	24.5	6.1	11.5	3.8	3.7	21.6	12.4	41.1	37.9	4.6	37.7	31.5	10.2	7	3.6	36.9	30.6
ATAD2B	34.8	52.8	86.6	68.7	59.5	61.9	48.3	60.5	84.5	96.2	91.5	77.6	51.1	46.6	86.9	71.7	73.3	67.5	82.5	76.1
ATAD5	26.2	23.6	10.2	22.2	21.6	32.5	28.3	22.2	26.1	50.3	22.8	55.7	47.2	23.4	26.2	44.6	8.4	19.3	42	55
ATAT1	95.7	99.4	114.6	91.7	124.6	110.3	136.3	149.8	100.9	172.4	145.9	115.6	105	126.7	106	39.6	132.5	111.8	122.8	187.2
ATF1	281.6	208	148.5	159.2	149	282.8	108.8	46.5	216.3	143.9	113.5	119.3	283.2	130	179.3	156	124.6	121.2	141.9	127.6
ATF2	202.75	124.55	100.45	81.6	88.35	118.9	97.75	73.65	97.25	82.3	88	105.55	81.95	118.7	128.45	97	120.45	94.65	113.6	78.95
ATF3	593.6	873	971.6	942	2963.2	2304.3	1616.7	1663.1	638	907.6	266.3	143.6	94.6	568.2	65	121.5	93.1	96.7	93	100.9
ATF4	2490.8	2814.8	1846.5	2065.9	2058.5	1856.3	1869	3147.4	1539.8	2087.4	1742.2	1063.7	1339	1369.8	984.7	1557.1	1104.5	1025.6	1193.5	1365
ATF5	27.1333	31.4333	63.9667	152.967	76.8333	47.3667	67.9	77.3667	42.5667	103.667	51.6667	51.9	37.6667	48.0333	49.7	45.1333	77.6	53.2667	47.9333	69.6667
ATF6	135.3	152	124	173.6	139.55	91.3	135.3	138.1	126.9	133.1	155.95	49.2	106.15	73.55	128.65	109.35	19.35	125.45	107.45	71.8
ATF6B	110.35	77.1	178.25	116.35	57.15	66.1	65.65	99.85	112.2	70.45	74.55	83.05	95.1	51.35	80.5	54.65	68.95	68.45	81.95	109.6
ATF7	31.3	22.1	55.4	33.8	41.1	39.6	51.1	14.4	38.2	80.6	52.9	67.5	31.7	30	41.7	48.4	49.3	47.2	45.7	70.3
ATF7IP	65.3	68.05	82.9	69.1	48.45	61.7	44.7	41.25	69.15	75.55	93.75	91.4	123.2	104.45	83.4	51.75	44.1	76.6	83.35	100.85
ATF7IP2	86.3	66	44.4	33.7	14.9	44	28.9	31.6	11.1	65.1	111.4	16.8	21.5	71	135.5	55.2	39	58.5	15.5	82.1
ATG10	45.3	49	17.7	43.4	80.2	67.5	52	70.5	32.1	45	68.3	42.5	41	26	47.6	76	48.7	37.6	58	80.2
ATG101	114.5	190.6	112.3	107.7	157.6	75.5	144.6	271.7	129.6	160.2	156.9	171.8	156.9	135	94	94.7	141.7	175.2	142.9	117.2
ATG12	208.233	150.133	113.9	126.6	162.367	232.967	102	100.7	137.767	112.7	136.333	109.6	103.967	105.267	129.833	104.767	69.2667	89.9333	77.1333	80.6333
ATG13	162.267	180.6	241.367	163.967	272.467	203.667	264.067	277.9	171.933	238.833	191.367	218.2	222.1	148.767	154	205.067	236.167	188.033	236.067	269.467
ATG14	89.6	144.1	143.9	141.1	195.3	275.6	86.8	139.2	186.1	140.3	162.5	127.4	99.3	141.7	136.6	146.3	136.8	146.8	149.5	135.8
ATG16L1	9.2	15.5	17.1	54.2	35.8	6.1	18.3	32.4	3.4	15.4	35.8	9.7	2.8	20.8	22	5.5	7.6	1.4	5.2	17.8
ATG2A	136.5	288.2	243.4	215	216.9	135.1	110.2	179	280.1	174.1	172.6	96.3	155.2	157.8	137.4	160.6	209.4	118.1	173.5	125.1
ATG2B	65.1	50.8	91.3	36.9	48.3	54.5	46.1	31.6	34.6	62.9	79.5	55.6	72.7	49.4	53.5	64.4	55.5	38.9	50	59.9
ATG3	317.95	191.8	136.3	183.45	166.8	216.3	207.95	116	178.2	165.75	146.25	197.1	373.5	149.55	228.9	209.45	159.5	197.7	134.8	134.45
ATG4A	138.4	118.2	110.3	119.4	121.5	132.3	127.5	95.9	118.9	194.2	128.9	164.5	92	123.8	113.2	98.3	178.6	106.3	187.6	214.8
ATG4B	85.8667	171.567	106.433	122.867	124.233	64.9667	111.333	169.8	169.9	120.967	142.967	150.5	161.7	106.533	124.733	111.433	112.933	109.4	133.367	108.9
ATG5	131.067	116.467	110.433	85.5333	100.533	121.3	124.467	59.6333	91.0333	130.2	98.5333	119.9	131.033	108.133	115.433	123.033	108	116.133	99	114.033
ATG7	128.4	86.9	96	98.9	116.2	85.5	70.9	93.5	144.5	140.1	155.7	164	226.4	122.6	157.7	122.5	135.8	238.4	139.6	121
ATG9A	124.2	144.4	127.2	128.4	147.5	96.7	155.8	116.4	175.7	167.6	154.9	116.2	91.6	122.5	100	89.3	175.6	156.2	167	184
ATHL1	38.6	49.8	74.4	81.8	47.2	42.8	35.8	119.8	77.8	65.2	11.4	6.8	39.1	13.9	52.4	69.3	86.2	58.4	56.4	65.8
ATIC	296.1	196.2	253.5	405.1	268.8	219.1	433	214.6	306	380	254.6	255.7	165.5	244.5	301.3	236.3	318.2	299.5	330.2	251.1
ATM	80.9667	70.8333	140.533	81	69.3667	64.3	46.9667	53.8333	71.6333	101.533	123.5	193.6	134.2	123.9	124.567	115.067	94.4667	146.967	138.233	136.2
ATMIN	155.35	173.35	172.85	159.6	148.3	165.95	71	110.05	141.4	125.7	180.65	155.85	136.4	180.95	186.45	158.35	155.6	161.95	138.35	145.5
ATN1	95.3	84.9333	102.833	136.467	117.733	70.9333	95.9333	176.433	99.9667	106	59.0667	64.3	99.7	81.6333	73.7667	83.5	80.7333	50.1333	74.0333	89.1333
ATOH1	7	3.5	7.2	7	10.3	17.5	9.5	42.3	4.5	10.7	24.9	6.8	5	20.4	8.3	5.9	10.3	11.8	6.6	9.2
ATOX1	196.8	163.3	134.1	214.3	105.5	116.2	113.2	183.3	223.8	210.6	253.4	250.3	266.5	217.5	203.3	203.7	232.8	339.3	270.2	238.9
ATP10A	38.25	36.1	38	24.75	42.6	42.95	26.45	43	26.65	86.15	59.25	19.1	32.15	33.15	37.6	32.4	11.5	27.55	40.5	53.45
ATP10B	40.3	62.7	61.25	58.35	66.85	73.95	68.5	96.75	59.35	107.75	92.4	77.1	56.2	57	73.95	78.75	71.45	60.45	80.1	130.15
ATP10D	138.9	136.7	178.7	101.1	135	200.7	73.1	99	151.3	135.5	131.7	155.1	148	162.7	191.7	111.8	164.7	172.6	164.8	170.6
ATP11A	31.1	18.6667	18.8	28.6333	26.6333	12.2	10.2333	25.8	13.8333	26.3333	21.9	23.3667	42.7	30.7	30.0667	34.7333	8.7	28.2	28.3667	29.6
ATP11B	219.3	137.3	80.7	129.5	113.1	126	85	93	104.8	77.5	155.1	89	174.4	94	102.1	93.3	182.3	162.6	109.1	117.5
ATP12A	34.3	51.2	82.2	21.7	57	63	53.5	78.3	48.2	63.3	29.7	30.5	39.8	26.9	30	45.3	39.2	46.3	45.8	61.6
ATP13A1	113.4	164.9	164.1	181.6	170.5	84.2	138.4	181.4	213.4	163.1	180.4	182.8	187	186.3	165.2	200.4	216.8	212.9	190.7	139.1
ATP13A2	2.2	5	4.1	6.4	6.2	3.9	4.1	8.2	4.5	9.6	16.2	13.2	8.1	11.9	9.6	7.3	29.9	8.3	32.2	10.7
ATP13A3	110.5	92.25	35.95	82.25	121.75	96.65	150.7	146.85	39.75	56.6	56.35	77.75	49.75	55	68.45	55.1	73.3	73.3	59.3	70.9
ATP1A1	1741	1487.3	1004.4	1565.7	756.1	392.8	782.6	681.4	1041.3	1090.1	508.4	521.7	867.2	577.7	574.8	494.9	687.3	507.4	521.2	618.1
ATP1A2	45.05	76.6	140.35	72.2	35.55	67.9	34.2	68.25	75.2	106.05	24.8	16.3	81.75	32.15	33.7	36.9	38.55	50.45	41.7	61.8
ATP1B1	80.4	126.75	198.25	309.6	166	454	72.8	167.4	304.5	179.85	468.85	343.8	407.2	285.7	397.25	99.6	151.55	395.6	200.9	208.55
ATP1B2	30.4	24.2	50.5	40.8	19.2	50.3	43.3	60.9	40.8	50.8	58	63.9	32.5	52.6	61.6	37.8	50.1	42	63.6	84.1
ATP1B3	1950.4	1355.6	1161.8	2155.5	1135.9	1067.2	1589.8	1341.2	974.8	1443.7	1495.4	1285.6	1554.3	1381.8	1501.7	1655.4	960.7	934.3	1283.4	747.6
ATP1B4	5.4	18.1	4.5	10.7	5.5	10.9	15.4	21	17.4	22.2	14.3	5.3	10.7	11.9	10.5	10.1	24	13.2	9.1	25
ATP2A1	26.9	25.3	35.5	32.5	37.1	48.8	27.1	56.8	29.9	44.1	29.9	37.1	40.8	36	30	34.4	6.5	31.1	34.3	63
ATP2A2	332.067	284.033	258.033	432.633	401.8	390.2	410.133	405.367	297.567	318.6	243.633	281.267	267.767	282.833	244	256.433	308.533	357.067	294.767	235.9
ATP2A3	6.825	8.175	7.95	7.7	5.55	5.05	7.175	9.975	16.725	6.35	8.025	8.875	22.7	21.975	7.475	11.275	16.025	5.475	19.65	26.525
ATP2B1	115.167	193.967	286.667	311.067	157.567	146.6	144.533	150.667	226.367	122.033	131.4	135.533	106.133	128.1	162.867	106.733	100.4	162.2	130.867	135.2
ATP2B2	7.16667	17.1333	23.2333	23.1333	7.06667	14.8	5.76667	9.86667	8.83333	13.7	11.6667	12.7	17.0333	17.3333	17.0667	22.1	18.8333	11.9667	19.4667	16.1
ATP2B3	9.53333	4.3	18.7333	7.73333	8.06667	9.63333	5.6	7.73333	5.06667	17.2667	14.7	11.5	13.1667	6.26667	13.9	10.6	5.6	6.9	8.1	10.3333
ATP2B4	162.667	189.667	355.667	307.967	296.933	251.233	283.7	325.6	250.367	331.467	343.1	291.7	235.167	439.967	317.3	361.567	421	351.733	467.067	441.633
ATP2C1	92.575	68.2	100.125	70.125	51.025	120.975	64.575	48.5	73.475	74.875	113.225	88.2	91.3	86.55	108.025	81.225	73.4	89.375	117.65	86.625
ATP2C2	23.15	20.55	31.6	20.75	16.55	19.3	28.4	21.9	15.75	28.85	19.95	16.15	27.35	19.35	15.75	12.1	29.05	10.8	19.15	25.2
ATP4A	6.4	14.6	12.7	45.6	60.2	36.8	9.6	4.7	21.4	62.9	30.5	11.1	11.9	9.3	5	8	28	32.8	35.7	67
ATP4B	12.1	9.3	24.6	6.7	32.4	28.1	26.7	34.6	29.8	31.6	61.2	18.5	27.5	18.5	16	47.1	29.2	2.2	18.7	30.4
ATP5A1	2059.3	1400.6	1408.9	1563.4	1227.1	1227.1	1455.2	1098.6	1503.2	1302	1632.7	1829.9	2347.3	2106.4	2191.8	1373.9	1808.2	1877.6	1564.6	1359.3
ATP5B	995.8	853.7	1048.2	1473.2	1005.2	807.4	1237.8	982.8	1235.7	1202.8	771.1	890.6	850.7	1118.5	1182.1	967.1	1459	1126.9	1273.3	982.4
ATP5C1	553.35	734.2	719.825	783.05	531.375	729.75	681.425	540.4	591.55	761.05	835.275	923.5	671.675	924.95	847.025	1015.15	705.9	791.6	639.925	662.475
ATP5D	48.15	142.35	105.65	121	235.65	71.05	218.4	151.65	202.1	238.7	138.2	116.55	78.45	120.15	103.7	106	227.15	174.2	203.65	235.95
ATP5E	1731	1001	1123.2	1056.9	875.6	1223.8	1322	1124.2	1267.5	1313.8	1893.7	1398.6	1884.7	1768.8	1380	1472.9	1962.9	1885.9	1276.1	1310.8
ATP5F1	1637.8	1340.7	1038.4	1161.2	976.7	1443.4	1438.1	1053.4	1171.6	1200.8	947.6	1637.4	975.4	1206.8	1573.3	1422.2	1178.7	1721.2	1045.7	970.3
ATP5G1	338.6	208.9	210.8	316.5	167.5	185.4	298.5	305.7	211.3	234.3	225.8	213.6	185.3	251.1	258.1	255.3	250.9	258.2	231.9	277.3
ATP5G2	749.65	550	677.25	617.05	292.75	211.1	185.8	250.5	346.2	279.9	438.05	514.3	146.6	742.55	640.4	479.7	396.1	327.15	378.25	466.15
ATP5G3	989.55	489.2	448.25	640.85	449.35	539.35	545.95	381.5	640.7	762.6	621.35	708.25	1328.15	639.5	813.8	582.15	712.25	828.35	697.8	515.75
ATP5H	1096	1200.5	1297.4	1353.2	905.1	793.8	1206.6	863.5	1186.4	1022.7	925.1	1164.9	547.4	1502.9	1498.7	1703.1	1214.4	1325	1107	963.1
ATP5I	641.7	443.45	383.5	464.5	415.4	420.85	438.6	414.1	388.65	494.45	612.05	431.75	867.4	433.85	418.45	483.1	501.4	444.5	459.2	454.1
ATP5J	597.2	567.3	708.9	554	447.1	769.6	619.9	502	611.7	523.1	517.2	694.3	593	631.2	712.3	659.8	615.8	670	554.6	386.8
ATP5L	1276.38	815	635.725	672.225	631.875	432.7	742.275	546.675	645.7	745.75	660.675	981.05	782.075	847	840.625	913.5	903.4	850.675	868.375	705.7
ATP5O	661.75	597.6	564	511.1	443.2	502.25	492.05	468.1	529.7	568.1	571.65	649.35	405.35	618.65	570.3	649.55	542.55	542.25	578.05	470.95
ATP5S	79.8333	54.6667	68	43.2667	39.6667	67.0333	54.5333	49.6	48.6667	82.1667	52.3333	72.4333	108.3	40.4	57.2	61.9333	55.7667	62.3667	56.5333	65.0333
ATP5SL	210.3	155.65	156	150.5	130.95	131.9	108.9	96.35	235.15	148.65	130.45	130.5	173.2	153.9	119.8	120.45	120.45	118.2	149.85	121.1
ATP6AP1	713.8	558.7	518.9	615.8	515.5	249.3	384.5	396.2	968.5	619	400.3	621.8	662.2	478.7	595	440.3	915.5	946.7	688.1	676.5
ATP6AP2	571.1	500.733	407.633	431.3	467.167	592.467	502.733	288.367	542.933	373.467	494.467	691.133	717.067	548.533	710.367	582.233	788.267	920.633	569.767	430.167
ATP6V0A1	113.3	165.85	199.3	147.95	203.75	162.55	156.75	311.5	217.05	153.3	176.3	165.5	220	199.6	200	197.55	265.4	287.85	291.45	218.2
ATP6V0A2	45.65	40.95	25.25	42.6	58.6	28.1	63.55	33.7	26.65	52.5	37.85	43.05	50.7	35.5	48.7	32.45	53.4	40.4	42.55	45.05
ATP6V0A4	26.2	25.3	34.6	17.1	19.2	22	16.2	39	29	39.3	29.7	41.1	31.9	15.7	19.3	22	37.1	5.6	27.8	59.3
ATP6V0B	513.3	558.2	428.5	395.4	432.2	221.6	521	388.4	676.2	638.6	451.8	677.8	765.1	532.9	563.3	713.4	787.9	1038.7	795.5	549.7
ATP6V0C	492.1	915.75	517.65	786.8	849.8	506.5	918.3	745.35	986.95	863.2	638.45	705.85	598.5	588.8	657.65	748.75	985.55	1059.25	735.3	644.2
ATP6V0D1	567.8	454.9	521.8	878.4	501.8	278.3	418.1	438.2	687.1	675.1	678.7	789.6	1011.8	695.2	790.2	694.2	842.4	1162.1	865	723.3
ATP6V0E1	1234.1	805.417	697.667	668.583	470.483	648.033	587.683	504.25	739.633	627.067	659.783	729.867	728.3	697.783	823.05	823.483	704.617	961.35	661.967	567.967
ATP6V0E2	70.9	69.3	85.4	69.8	47.5	53.1	13	88.4	79.7	98	181.3	174	138.9	98.3	167.3	167.2	138	196	159.6	141.9
ATP6V1A	665.65	246.4	245.5	310.75	272.25	390.85	254.25	186.15	319.85	311.45	395.2	404.5	727.9	413	465.7	328.6	429.15	485.75	366.65	310.75
ATP6V1B1	19.1	16.9	43.6	22.2	5.1	5.7	27.3	8.5	11.5	4.3	18.1	15.7	21.6	27.7	3.5	2.4	13.3	5.3	4.3	7.5
ATP6V1B2	797.1	627.7	771.1	561.3	584.2	584.4	519.2	557	644.2	587.2	412.1	815.7	436.4	578.4	657.9	478.1	777.5	922.8	751.3	450.4
ATP6V1C1	197.267	156.9	74.1667	63.0333	65.3333	76.7	91.6	62.2333	72.4667	140.067	119.433	155.433	97.1333	101.933	128.467	91.5333	105.133	126.867	131.2	121.767
ATP6V1D	269.833	225	177.533	153.733	123.833	187.833	193.5	172.133	172.8	223.033	234.567	241.767	116.567	199.633	210.533	214.833	204.3	260.333	238	205.6
ATP6V1E1	665.7	596.6	402.4	477.3	384.4	331.3	413.7	314.6	621.6	415	361.3	556.9	167.1	557.5	416.9	485.6	511.5	493.6	489.3	335
ATP6V1G1	776.9	825.6	586.9	896.2	872.6	986.8	605.1	374.8	943.9	723.4	791.8	672.3	751.3	696.3	666.6	629.7	544	808.2	613.2	553.6
ATP6V1G2	57.6	60.7	58.8	25.4	47.2	48.1	47.7	53.3	52	68.9	72.8	42.4	36.4	33.9	36.2	61.5	57.8	39.5	65	98
ATP6V1H	315	187	211.7	178.3	116.6	155.3	54.9	72.5	203.9	132.3	227.3	196.7	270.4	235.1	178.1	171.8	254.2	195.4	229.3	159
ATP7A	51.35	55.6	106.65	99.9	73.1	73.55	37.85	103.3	64.75	80.85	78.95	68.7	72.7	77.2	78.45	62.3	58.3	59.25	65.6	117.3
ATP7B	45.1	56.9	75.1	99.2	52.6	91.6	49.8	74.8	54.8	107.7	58.2	49.3	37.8	47.6	38.4	95.6	38.4	43.5	58.7	98.3
ATP8A1	35.9	20.35	37.45	28.9	27.1	56.95	33.3	44.35	14.5	45.9	55.7	21.5	36.35	39.7	18.95	16.05	24.8	38.6	36.1	60.65
ATP8A2	13.25	27.7	43.8	19.2	26	30.75	25.95	20.3	24.2	17.95	35.05	37.45	16.4	29.45	22.7	39.7	19.15	22.55	26.45	30.85
ATP8B1	124.4	249.9	160.2	329.2	306.6	188.7	224.2	237.8	178.6	226.4	407.9	158.6	309	110.4	149.9	77.7	128.3	156.2	117.4	394
ATP8B2	72.7	81.8	119.5	59.7	111.9	64.6	124.5	126.3	122.6	130.6	83.8	122.8	73	115.3	114.6	115.1	140.4	102.3	146.3	154.3
ATP8B3	2.3	2.9	18.6	4.1	5	5.3	11.1	8.8	4.5	10	7.8	4	5.6	4.4	2.8	8	8.2	4.2	9	6.4
ATP8B4	35	27	34.9	33.1	61.8	52.9	65.5	53.3	23.5	49.9	67.7	56.7	41.8	61.9	52.8	78.2	46.7	71.1	57.5	71
ATP9A	36.75	77.6	87.1	63.1	38.1	53.65	17.5	50.1	65.4	26.25	108.7	100.8	72.4	126.05	101.5	94.5	54.3	35.75	68.45	81.2
ATP9B	60.25	45.45	45.65	44.4	51.65	44.95	38.3	36.15	40.9	53.95	67.8	21.05	101.55	50.25	50.65	33.95	44.3	60	87.2	61.15
ATPAF2	52.4	40.3	26	35.15	20.1	18.45	16.25	26.55	20	25.45	60.8	44.65	40.8	39.05	51.05	46.9	35.45	35.15	49.7	49.9
ATPIF1	376.9	228.8	170.7	230.6	113.8	141.7	77.5	131.4	154.8	178.8	364.4	229.6	732.7	374.9	287.4	429.7	275.8	220.5	223.6	275
ATR	102.4	57.85	85.05	112.75	86.3	84.6	105.05	60.85	68.45	57.65	88.85	45.25	77.25	63.05	83.3	56.65	80.55	80.45	43	44.65
ATRAID	856.4	946.2	783.4	640.6	627.4	680.4	706.8	608.5	897.9	692.1	820.3	1058.4	1325.4	945.9	1325.3	1099.6	1099.1	1150.3	967.1	923.3
ATRN	148.35	70	95.05	99.85	83.2	128.9	84.2	80.7	78.75	123.75	109.75	150.55	159	132.1	170.05	123.9	165.25	185.65	135.5	177.35
ATRNL1	22.8	8.35	23.95	27.3	5.4	5.5	17.3	15.4	5.9	36.15	18.55	25.45	19.7	30.75	22.25	26.45	11	4.2	15.4	32.65
ATRX	93.025	149.55	146.775	137.2	182.075	199.3	110.65	121.95	154.85	174.05	225.85	189.425	125.275	154.475	138.225	191.75	148.4	162.275	172.15	158.85
ATXN1	69.5	127.85	196.95	64	62.95	179.75	25.7	109.45	97.7	42.65	250.2	202	126.9	319.55	243.25	251.45	260.35	172.8	279.4	213.2
ATXN10	418.3	483.05	505.45	560.6	434.3	596.2	609.25	492.1	424.45	617.65	475.45	502.35	425	634.55	558.3	455.45	591.2	561.95	558.1	567.25
ATXN2	82.8	94.6	163.6	106.4	207.3	153.3	138.4	129.6	134.6	83.5	123.1	36.5	114.4	86.2	91.6	146.2	26.7	88.9	88.9	73.9
ATXN2L	4.85	18.8	26	53.1	43.35	25.6	38.6	50.1	36.8	23.35	11.55	22.75	20.55	12.2	25.95	16	35.3	29.1	13.5	23.5
ATXN3	41.75	28.25	32.15	25.325	23.2	24.4	18.5	20.375	18.15	31.5	40	30	26.175	27.35	30.35	34.15	24.675	18.9	29.05	43.65
ATXN3L	30.6	24.3	42.2	35	13.6	30.6	39.2	10.6	14.2	47.1	22.8	19.3	25.8	35.5	18.8	36.9	40.5	11.8	35.4	55.4
ATXN7	80.95	90.85	85.1	121.65	155.85	173.85	93.15	171.7	98.2	119.1	100.9	60.4	42.45	77.6	103.95	47.85	58.7	75.4	103.5	118.35
ATXN7L1	29.7	7.15	8.85	10.3	3.5	5.55	6.8	4.2	3.7	7.05	10.15	10.25	4.9	7.2	13.35	16.7	7.95	4.8	4.7	8.65
ATXN7L3B	256.75	296.8	317.95	304.45	251.65	193.6	183	230.45	265.45	233.05	262.65	322.2	201.6	258.85	296.65	221.8	229.35	207.7	291.25	248.2
ATXN8OS	22.6	8.9	77.3	85.2	11	14.3	43.7	135.7	13.2	66.2	16.2	77.1	10.2	93.4	48.3	96.9	14.3	11.1	71.7	84.4
AUH	216.5	221.1	134.6	154.5	179.3	285.9	129.7	94	251	182.4	117.1	118.1	197.7	85.2	122.3	128	121.3	129.9	117.7	162.8
AUNIP	44	43.4	39.3	34.7	67.8	40.4	70.2	56.2	28.9	87.5	57.2	10.4	10.4	53.9	39.4	51.6	28.7	60.5	54.8	97.1
AUP1	259.6	325.3	179.2	244.4	246.5	115.5	237.9	165.6	234.1	206.4	170.5	138.8	127.5	167.5	121.8	221.2	230.2	174.7	177.4	167.2
AURKA	17.7333	14.9667	13.5333	11.1667	20.1	26.8	15.9	12.4	8.66667	34.1667	14.9667	22.9667	27.1333	14.9667	30.6	26.6	11.0333	14.7333	32.4	19.7667
AURKAIP1	363.9	352.2	299.9	405.1	268.8	174.1	356.6	310.4	343.7	375.7	362.8	329.5	448	340	284.3	374.7	446.8	294.5	333.4	322.3
AURKB	17.9	16.7	25.9	23	12.2	19.2	28	10.7	22.3	6.7	38.5	23.1	15.3	20.2	16.8	33.1	39.6	14.3	20.6	7.3
AURKC	81.6	57.1	47.8	63.2	69.9	73.5	123.6	119.3	81.9	114.3	115.5	89.5	82.7	70.8	83.5	112.5	109.1	104.2	79.8	96.8
AUTS2	613.3	408	684.9	855.8	781.5	560.4	635.5	660.4	569.7	491	1013.5	899.7	441.7	1051	960.6	572.6	1310.7	767.2	784.6	610.8
AVEN	84.4	126.1	73.2	173.6	105.7	112.2	165.7	114.2	102.3	124	59.2	54.1	33.4	108.6	70.3	98.3	56.5	52.7	63.4	44.1
AVIL	24.75	21.7	9.8	20.05	6.15	18.5	23.9	23.95	14.2	23.5	27.15	26.75	23.15	29.4	18.35	22.6	26.4	33.4	29	32.4
AVL9	56.8	53.1667	68.8333	43.8	64.4	63.1667	30.9667	27.7333	44.5	49.6333	64.7	66.7333	61.5333	63.6667	57.8333	42.5667	63.6667	47.8	64.3333	71.1667
AVP	4.9	3.8	4.9	23.3	7.4	4.1	11.9	15.8	3.4	9.2	37.1	2.9	5.2	5.1	7.8	4.9	2.2	4.6	4	8
AVPI1	206.1	478.1	476.7	433.3	405.8	471.3	515.6	474.4	508.7	415.3	264.5	367.8	324.3	217	237	241	338.3	426.4	403.5	358.5
AVPR1A	16.4	21.0667	22.7	17.6667	14.4	12.1333	15.2333	11.2333	10.9	36.4333	27.6667	14.8	15.6	22.9333	10.5	29.4	20.3	6.1	16.4	28
AVPR1B	23.9	20.3	91.1	51.7	26.7	28.9	30.9	53.6	39.8	42.7	41.5	74.7	53	32.7	45.6	57.6	33.7	89.9	26.1	30.8
AVPR2	6.3	5.35	16.5	12.6	4.4	3.8	9.3	9.1	8.15	10.25	14.25	10.95	18.65	5.1	8.7	8.45	5.45	8.95	10.5	12.85
AXIN1	18.8	92.8	12.2	48.5	135.8	125.9	135.5	123.4	93.4	120.1	126.3	63.8	15.7	38.8	55.6	91.7	118.1	30.3	61.8	32.7
AXL	255.3	615.05	658.25	580.15	363.55	453.25	320.2	510.15	509.7	332.15	277.45	293.6	203.4	447.95	277	501.3	331.85	290.85	450.4	407.35
AZGP1	23.1	19.6	18.9	14.6	11.5	3	11.8	17.7	3.8	32.5	18.8	12.6	23.6	4.8	7.6	30.3	3.7	1.5	14.8	14.7
AZGP1P1	5.4	34.5	44.2	39.5	49.2	15.9	54.2	32.8	41.9	31.1	14.9	30.2	30.5	13.7	36.2	68.4	66.1	21.8	32.4	34.3
AZI2	157.3	165.5	80.8	115.8	162	141.3	81.3	98.2	166.4	145	83.6	58.5	99.1	71.6	45.1	61.4	79	134.2	62.9	102.4
AZIN1	330.5	486.1	255.95	367.05	260.35	273.4	309.5	201.95	262.05	267.5	279.25	424.25	290.45	355.15	394.25	383.7	263.85	318.15	315.35	276.3
AZU1	19.9	18.3	4.3	26.6	6.3	6.2	7.5	8.3	6.7	45	33.7	19.4	18.6	5.2	29.8	33.8	5.5	5.7	13.5	8.9
B2M	8687.6	5747.8	6684.55	5708.95	5090.65	6740.15	7149.35	5796.4	5080.45	4776.95	6487.65	5870.2	6999.85	7678.6	7214.55	7803.6	7735.9	5828.7	4202.25	6365.95
B3GALNT1	30	16.7	16.5	12.2	18	24.85	21.1	23.5	14.55	22.3	46.45	70.6	42.2	39.15	52.6	48.65	49.8	55.45	50.75	46.55
B3GALT1	7.6	3.3	5	2.3	2.8	6.4	2.3	13.4	4.4	6.6	4.6	3.8	6.5	1.8	2.6	3.9	3.9	2.8	2.1	6.5
B3GALT2	4.65	2.6	6.5	4.1	0.55	4.3	1.65	0.95	0.5	0.75	5.9	5.85	4.5	4.35	0.65	12.25	1.3	0.45	0.9	2.55
B3GALT4	37.8	48.7	42.5	46	24.95	23.7	21.3	13.9	32.6	41.05	73.75	25.7	67.15	60	43.1	46.25	30.35	22.75	26	13.45
B3GALT5	29.8	19.6	41.9	13.1	29.4	34.2	25.7	36	19.4	47	69.2	12.6	39.8	30.2	31.5	34.1	35.1	16.3	31.4	57.8
B3GAT1	5.5	4.4	8.4	4.9	6	5.4	7.3	8.3	11.9	7.2	6.5	4.2	5.2	9.7	3.9	10.3	11	5	19.7	8
B3GAT3	32.45	33.95	20.35	30.8	17.8	5.95	17.75	18.1	38.85	15.4	41.7	21.6	33	17.95	21.2	31.7	22.9	14.25	29.3	27.45
B3GNT1	122.9	210.9	291.5	209	272.7	210.7	151.7	145.9	285.3	259.2	179.9	155.1	140.4	193.6	164.7	288.2	218.3	261.9	296.3	393.6
B3GNT2	100.2	127.5	83.5	76.3	100.9	97.2	112.6	129.7	89.8	127	103.3	139.9	99.6	86.5	133.5	104.3	132.4	138.9	149.4	132.8
B3GNT3	27.8	30.3	54.4	6.4	131.9	52.6	95.5	51.4	43.2	34.8	57.4	32.5	22.7	27.3	45.5	12.2	81.9	71.4	37.1	31.1
B3GNT4	37.2	29.4	64.6	71.9	49.8	70.3	76.6	74.6	47.9	109.2	73.1	53	54.1	37.9	42.6	55.1	48.1	77.7	56.7	79.4
B3GNTL1	26.95	11.9	20.75	38.7	29	24.1	39.55	49.9	22.4	46.7	33.8	24.05	46.6	30.1	28.85	16.55	50.3	42.75	36.65	56.4
B4GALNT1	22.2	32	8.5	32.9	58.8	79.2	75	34.7	31.9	58.6	57.2	31	31.6	12.6	34.6	51.6	87.9	40.5	43.2	102.2
B4GALT1	32.8	44.975	60.65	44.15	45	32.4	63.5	65.55	42.925	72.65	38.95	44.225	43.6	41.775	44.425	45.025	57.675	61.925	48.9	92.9
B4GALT2	86.7	70	113.5	155.1	159.8	115.8	182.4	160.1	115.5	199	203.2	145.2	137.7	147.5	111.7	139.4	171.9	86.1	150.8	198.7
B4GALT3	120.4	182.2	117.1	148.6	131.1	94.4	119.6	159.6	140	152	103	122.8	116.6	110	105	135.2	106.2	115.7	119.5	130.8
B4GALT4	52.65	55.05	37.8	57.85	43.3	57.65	29.05	41.4	33.95	49	68.75	53.9	59.45	42.35	52.55	48.35	67.95	45	46.5	54.55
B4GALT5	199.3	135.15	165.75	320.6	556.4	407.75	677.7	619.3	189.15	178.15	243.5	144.7	115.1	180.6	192.15	158.1	213.5	203.65	199.2	192.95
B4GALT6	23.1	8.55	21.8	9.8	6.2	11.55	9.05	7.3	3.5	22.85	16.7	10.6	13.4	17	9.2	6.6	25.05	6.9	21.95	33.25
B4GALT7	70.7	69.95	87.8	64.85	47.25	49.55	66.75	89.6	51.15	63.1	119.55	96.45	72.55	40.05	84.75	77.05	117.85	70.2	69.65	80.2
B9D1	24.8333	22.9667	26.7	39.8333	18.1	13.5333	31.8	20.3333	27.2	33.6	28.5	35.4	52.8667	53.5333	33.1667	30.4667	37.1667	29.5667	42.8	39
B9D2	5.3	4.3	6.3	5.6	10.6	6.8	5.8	5.7	7.4	9	7.6	6.5	23.8	5.4	4.4	8.4	9.2	5.2	2.9	11.2
BAALC	31	14	26.8	15.3	41.8	46.7	45.2	31.3	22	43.5	75.2	36.2	21.4	36	19.9	43.9	38.6	24.7	27.3	30.3
BAAT	4.8	9.2	5.6	4.2	5.3	5.7	9	7.8	3.1	7.9	5	5.9	8.5	7.3	5.5	9.9	7.4	4.3	4.3	14.3
BABAM1	380.7	154.3	147.8	207.1	137.1	62.1	194	163.1	193.8	213.1	168.8	183.3	333.7	168.3	151.8	231.1	235.5	217	218.9	217.3
BACE1	148.9	181.3	220.8	150.8	141.6	165.1	92.6	89.5	133.7	122.4	220.7	105.1	141.7	251.5	168.6	259.2	230.2	148.7	177.1	133.6
BACE2	142.8	92	153.5	187.2	260.4	177.4	378.9	296.2	182.9	242.9	226.7	224.4	150.7	231.2	161.5	151.5	180.3	165.3	129.1	189.9
BACH1	87.4	277	183.8	220.7	159.9	460.7	149.4	280.2	183	73.3	107.3	181.2	166	150.2	184.4	141.6	233.1	128.4	147.6	115.5
BACH2	28.9	74.2	66.4	63.7	34.7	63.8	10.6	58.4	63.9	49.4	59.8	38.9	18.7	63.5	36.7	45.2	54.4	41	48.5	52.2
BAD	87.65	112.9	111.35	66.75	122.4	81.25	84.5	112.4	127.2	111.95	150.75	120.15	128.2	128.95	83	125.2	171.2	111.3	138.4	152.9
BAG1	316.8	306.45	270.9	257.1	264.95	188.7	332.65	204.1	328	311.35	175.25	193.2	247.15	232.25	193.25	283.2	228.05	208.05	207.8	222
BAG2	141.3	144.9	120.2	115.6	154.5	191.8	104	91.4	112.1	163.4	83.1	126.2	187.8	160.3	106.6	125.6	138	124.8	155.1	136.5
BAG3	463.8	1072.3	1012	929.9	2059.7	1769.9	1418.4	2177.2	790.8	630.3	320.8	305.2	233.3	294.9	235.6	224.3	301.1	336.4	402.5	314.6
BAG4	35.8	47.9	6.8	20.2	43.9	57.9	12.8	9.4	41.7	41.7	30.1	28.5	52.8	38.7	44.1	26.5	21.3	21.3	36	44.2
BAG5	234.5	190.55	193.35	239.45	239.95	221.2	135.85	191.65	211.25	172.75	186.25	174.8	277.15	216.55	184.1	192.3	170.65	132.05	183.6	181.6
BAG6	207.9	524.333	470.367	598.1	498.367	250.133	419.3	473.867	507.9	454.6	495.933	464.333	271.4	427.667	323.3	460.6	593.567	441.833	433.833	473.833
BAGE	7.9	6.6	14.2	20.2	1.4	11	2	4.2	6.7	17.9	15.6	10.3	7	2.2	6.2	7.4	2.1	2.2	4.9	11.1
BAHCC1	72.4	25.1	71.9	89.5	64	26.8	42.5	41.8	51.2	41.7	68.4	48.2	74.8	71.4	46.2	84	35.3	12.4	72.3	50.5
BAHD1	46.4	81.6	62.3	107.4	70.8	57.4	67.5	106.6	56.6	83.9	98	70.7	80.5	81.7	66.3	88.2	57.3	85.3	66.2	54.8
BAI1	10.9	4.4	15.2	26.3	22.7	13.7	17.5	25.7	14.9	19.6	20.1	2.7	11	16.6	13	3.7	54.7	15.4	12.8	12.8
BAI2	9.2	21.2	9.2	5.2	39	24.7	35.7	24.4	33	50	72.1	14.1	45.8	34.6	24.8	8.8	72	67.6	43.4	18
BAI3	28.2	36.7	44.25	58.9	23.65	43.95	15.05	16.7	35.95	27.2	41.2	58.4	51.15	33.85	114.35	39	55	57.35	63.8	67.7
BAIAP2	61.25	95.825	75.75	93.35	77.025	48.975	40.05	100.5	105.725	84.675	46.9	47.875	61.975	50.175	51.675	56.55	89.425	65.6	72.975	77.725
BAIAP2L2	2.4	17.8	9.5	4.7	15.5	13.5	6.5	16.6	17.7	19.1	7.1	3	12.5	5.9	9	38.5	29.1	23.7	11.6	30.8
BAIAP3	15.55	9.35	15.75	22.9	5.5	5.3	11.85	11.05	6.55	5.5	13.05	7.8	24.9	12.05	9.75	9.15	5.25	5	3.55	11.2
BAK1	59.5	47	68.9	70.3	23.6	37.2	74.8	54.7	28.6	50.6	121	71.7	68.2	49.3	68.3	50.8	29.1	76	102	26.5
BAMBI	61.1	54.4	66.4	74.4	84.8	94.6	102	109.7	43.6	79.6	76	73.2	59.8	50.6	73.8	60.2	73.5	45.6	56.4	76.4
BANF1	395.5	445.3	323.1	543.7	199.9	202.5	408.7	360	296.5	340.6	537.8	577	186.2	519.9	460.8	517.9	522.6	467.1	404	361.7
BANK1	43.3	39.8	42.3	32.2	3.3	35.3	16.5	29.5	33.8	33.3	38.9	59.6	101.6	57	81.3	94.1	53.5	38.9	54	62.1
BANP	118.6	112.4	192.6	174.6	127.2	126.7	91.6	150.1	122.4	148	185.9	166.6	106.5	152.3	167.9	151.8	237.8	93.9	183.4	208.4
BAP1	164.3	254.8	182.3	268.8	291.9	124.5	179.2	213.7	265.9	201.5	204.5	209.8	184.9	192.3	135.3	156.5	258.4	204.9	200	202.1
BARD1	33.7	10.7	29.2	14	48.9	38.6	2.7	23.6	18.8	5	46.9	14.9	5	19.5	39.3	9.4	22.3	14.1	21.1	6.3
BARX1	9.8	37.3	14.2	34	7.5	6.1	7	31.5	23.9	10.3	40.4	10.3	24	25.9	39.2	53.7	3	16.9	22.9	26.3
BARX2	3.4	6	7.7	31.7	10.8	7.2	8.5	9.9	5.2	76.5	11.7	4.1	6.3	6.9	42.5	10.7	15.5	8.2	8.2	16.5
BASP1	850.5	672.6	395.5	871	1022.8	905.4	1593.1	1515.1	1016	911.3	1702.8	1133.3	545.6	1970.3	1107.7	1271.7	1304.6	1558.5	1012.5	1185.6
BATF	130.6	85.5	12.3	17.3	64	21.4	30.5	46.8	33.5	43.4	25	34.2	14	9.4	18.4	29.4	23	22.5	19.8	11.8
BATF3	45.2	100.9	28.2	61.1	196	63.7	277	261.7	38	77.6	71.4	97.8	15.2	35.1	56.8	95.7	60.2	19.3	53.9	122.2
BAX	42.55	35.55	57.45	47.05	17.4	8	36.75	28.95	32.45	22.05	35.9	38.85	69	36.15	31.85	16.45	47.55	52.55	41.1	54.9
BAZ1A	119.55	111.3	94.05	96.7	126.1	141.85	154.2	121.8	121.45	117.3	98.55	80.35	65.75	75.45	84.8	80.8	48.8	103.75	61.6	51.7
BAZ1B	66.9333	89.1	76.8667	51.7333	51.1	54.3333	64.6667	28.2333	65.5	62.4	87.1	73.1	25.0333	78.5333	85.8333	86.8	84.8667	46.3667	54.2333	77.4
BAZ2A	60.825	82.925	118.275	112.6	103.125	89.425	92.875	117.55	101.725	107.3	83.05	48.25	88.95	69.15	80.875	78.3	91.6	62.8	76.15	107.9
BAZ2B	87.4	137.2	180	102.8	157.6	259.6	91.4	162.5	194.1	175	184.3	210.5	95.1	152.2	188.9	170.9	189.6	257.7	179.5	213.1
BBIP1	247.25	175.75	175.25	169.65	111.85	203.35	143.3	141.8	136.7	137.5	95.15	132.25	116.5	138.8	158.35	179.4	136.7	91.95	133.55	118.8
BBOX1	2.9	14.5	24.8	13.2	2.8	3.3	14	4.8	6.4	6.7	6.7	3	13.2	2.7	4.2	33.3	3.8	2.5	1.5	4.8
BBS1	240.6	350	353.3	253.4	239.9	388.7	268	216.2	274.3	336.6	254.1	279	314.9	222.5	277.8	324.7	275.4	226.2	307.2	324.5
BBS10	159	100.3	86.5	53.2	38.2	97.7	19.9	19.6	73.2	112.2	52.5	51.4	105.8	42.6	71.6	63.2	62.8	56.5	60.8	54
BBS4	47.45	50.15	64.05	40.3	45.05	51.7	45.3	24.3	51.45	31.5	76.1	67.95	33.8	53.25	59.8	58.55	45.1	51.75	69.4	47.25
BBS7	22.1	19.4	2.6	30.3	27.1	42.4	3.7	8.8	15.7	32.7	8.4	21.9	14.1	13.2	19.1	27.4	3.2	2.5	25.4	27.3
BBS9	61.075	33.8	44.3	20.85	12.825	20.875	20.85	25.3	23.625	31.575	38.35	28.3	21.9	25.725	19.775	41.8	38.95	22.1	48.55	37.625
BBX	253.65	193.4	422.5	440.25	295.65	324.75	144.65	302.7	253.5	269.45	250.3	261.8	219.9	340.15	471.8	147.75	134	152.3	215.9	227.9
BC069004	78.7	71.6	66.9	74.8	70.9	88.6	101.2	70.5	52.8	94.5	58.3	32	70	60.7	48.5	42	123.4	53.4	71.7	100.8
BC069739	7.9	20.7	9.7	15.3	9.4	5.7	2.6	19.5	10.5	26.4	16.6	14.6	12.2	16.3	12	14.3	22.7	9	11.2	35.6
BC069756	37	36	17.5	35.6	5.3	4.4	64.6	16	13.7	29.5	25.7	28.6	45.7	28.2	27.1	25.9	8	4.7	30.7	12.6
BC069776	53.2	43.7	43.5	54.2	35.4	30.1	46	66.6	44.8	71.7	70.1	54.3	48.2	48	34.7	41.8	48	37.7	50.6	92.5
BC113958	6.3	16.1	2.9	13.3	4.4	4.1	10.1	10	4.3	28	17.4	20.8	11.4	5.4	4.1	3.7	1.7	4.1	10.1	7.2
BCAM	53.7	57.35	88.55	65.6	141.1	122	156	254.25	137.1	98.5	103.6	53.2	63.55	88.05	23.85	54.25	83.5	58.2	73.8	98.6
BCAN	40.2	63.8667	84.6333	53.1	59.8667	47.2667	79.8	81.1	44.6667	80.0333	86.5	61.3667	63.3667	44.3667	71.7667	69.6	47.3667	46.2333	52.5	94.4
BCAP29	105.2	62.5	82.4	62.6	57.5	46.5	88.1	32.8	52.8	74.8	116.8	99.7	65.5	77.5	89	113	98.2	81.2	74.9	73.6
BCAP31	451.4	339.8	528.7	524.9	259.9	173.8	313.2	377.1	439.4	450.1	352.2	433.1	678.4	557.7	591.3	423.8	503.3	444.6	428.7	350.6
BCAR3	23.6	21.9	30.9	15.2	22.8	42.7	22.8	23.4	35.4	44.8	27.6	41.9	54.1	44.7	35.3	30	23.2	32.3	34.3	28.5
BCAS1	30.9	21.1	56.4	29.4	5.3	5.1	13.9	5.9	1.7	25.7	30.3	33.1	19.9	22.1	14.9	29.9	7.2	4.9	25.1	42.6
BCAS2	207.8	426.2	367.3	295.6	334.9	613.3	189.6	321.1	252.8	264.4	194.2	261.6	181.8	198.9	232.6	204.7	196.8	220.5	162.2	159.7
BCAS3	83.9	104.6	121.5	83.4	87.5	88.9	108.6	94.9	103.9	124.6	115.7	108.7	102.6	100	97.8	94.7	92	112.6	100.5	135.8
BCAS4	8.5	4.7	12.5	19.4	12.7	6.7	16.7	22.6	12.4	15.9	11.7	9.4	6	4.7	7.3	12.8	15.7	11.3	13	20.4
BCAT1	417.25	694.7	399.2	128.45	194.45	213.05	85.25	102.6	260.45	137.25	60.65	426	248.5	114.65	235.55	232.4	82.25	279.5	191.9	180.5
BCAT2	125.2	117.45	166.75	99.95	65.85	46.3	59.35	56.55	100.1	57.45	74.8	89.65	105.05	84.15	95.5	91.45	90.2	77	93.6	52.65
BCCIP	108.4	59.4	37	72.7	25.3	26.7	53.6	26.1	21.2	52	6	31.3	45.9	43.3	57.3	41.9	12	12.1	18.1	7.7
BCHE	1	13.3	12.6	14.7	15	8.7	30.9	19.6	16	27.5	32.5	15.2	18.3	3.5	35.5	3.1	21.5	15.3	14.6	15.5
BCKDHA	170.9	219.4	179.1	209.8	184.1	149.9	151.6	148.5	166.4	164.8	132	146.4	175.7	149.2	174.2	196.7	138.1	165.6	146.7	173.5
BCKDHB	51.9	59.95	27.6	42.85	21.7	42.15	20.1	19.65	33.6	40.5	33.9	34.9	45.75	36.25	30.4	30.8	32.75	50.8	33.65	31.5
BCKDK	41	92.1	106.4	117.2	110.2	68.9	132.4	140.4	139.1	109.5	130	113.5	110	104.6	134.7	93.4	152.1	149.5	112	168.1
BCL10	696.9	251.8	200.9	216.1	252.6	466.7	328.7	128	252.8	164.6	180.3	227.8	391.9	199.3	249.4	190.8	203.5	305.5	380.7	130.6
BCL11A	22.5	23	54.5	44.2667	23.2667	31.0333	47.7667	36.9	18.1333	46.9	53.5667	37.9667	36.2667	31.8	49.4	37.8	58.8	42.2667	42.3	63.4667
BCL11B	11.9	20.4	24	39	20	24.3	29.1	54.5	11.9	47.5	49.9	17	28.9	42.6	39.9	35	38	38.1	45.3	55.4
BCL2	31.875	19.9	41.775	30.375	42.1	36.475	32.325	34.05	28.725	51.625	46.025	36.775	32.5	55.05	35.85	41.375	31.85	30.1	40.725	44.65
BCL2A1	19.7	21.1	11.1	44.9	22.5	25.1	83.3	46.1	22.4	30.8	34.3	46.6	5.3	34.2	39.3	22	50.7	33	19.2	21.9
BCL2L1	61.9667	178.7	117.933	126.967	153.7	172.733	93.6667	135.8	248.633	211.9	64.5	116.033	68.3333	55.8	85.7	65.2	124.6	122.467	122.133	65.2667
BCL2L10	1.5	5.3	17.1	22.6	8.8	30.8	6	6.1	5.9	9.8	10.3	3.5	1.7	15.3	4.4	8.9	11.8	23.2	6.3	6.7
BCL2L11	23.7	25.45	18.3	6	17.85	13.4	18.2	25.75	10.85	17.7	4.55	10.45	12.4	10.25	4.6	20.2	16.85	8.55	6.95	7.8
BCL2L13	190.8	437.9	337	321.4	340.2	358.9	202	187.6	336.4	333.6	260.9	213.1	206.5	194.1	278.4	249.6	175.7	174.9	257.6	208
BCL2L14	84.8	13	95.7	57	58.8	77.6	91.9	68.9	83.3	129.7	70.3	71.3	69.2	56.5	59.8	33.5	59.2	52.1	30.3	118.8
BCL2L2	277.5	290.4	241.7	252.3	314	261.2	251.7	204	255.7	261.2	294.5	329.1	245.7	262.7	234.1	289.1	257	205.1	278.1	278.7
BCL6	1008.25	1628.1	1690.6	1565.05	1869.2	1886.3	1486.35	1486.65	1607	1184.85	339.75	347.25	412.65	340.3	434.3	340.3	445.4	460.65	461.85	303.5
BCL7A	24.9	41.8	52.05	32.55	55.1	73.95	50.9	69.2	49.4	50.5	35.6	31.1	20.85	32.05	23.75	19.55	16.35	26.9	28.85	79.75
BCL7B	83.1	154.2	80.7	127.7	241.5	127.8	118.9	247.4	191	159.9	83.3	131.3	140.3	92.4	76.2	63.2	148.7	128.8	171.1	94.6
BCL7C	57.7	70.7	28.5	38.4	31.4	14.1	78.7	115.9	72.9	97.1	58.4	88.8	117.7	141.5	103.4	109.3	133.3	96.8	167.1	128.9
BCL9	79.3	31.7	67.3	60.9	83.9	94.1	82.7	38	43.9	85.2	94.6	40.1	70.5	69.4	63.8	51.8	16.2	88.7	59.1	95.9
BCLAF1	145.975	393.45	352.325	420.875	500.6	572.375	280.825	266.225	259.125	324.875	237.85	314.2	103.75	257.35	318.2	225.7	275.375	232.375	293.025	283.2
BCMO1	14.2	27.9	8.7	43	16.3	30.6	22.7	42.4	22.2	27.7	48	21.6	6.3	29.9	13	23.1	18.5	23.3	19.8	75.2
BCOR	39.2	38.2	38.6	70.1	50.3	52.2	98.8	69.5	46.5	20.2	26.7	40.1	31	27.4	23.3	18.6	29.4	23.8	26.5	29.5
BCORL1	75	115.8	86.4	116.9	140.3	115	102.7	94.3	111.7	118	125.6	121.8	92.1	81	79.6	87.6	139.1	149.9	122.5	197.2
BCR	94.95	127.4	146.5	132.95	276.65	77.6	283.9	300.1	150.05	141.3	74.8	123.25	144.05	102.45	130.7	117.2	146.5	93.8	210.25	199.6
BCS1L	185.1	182.6	209	266.8	167.5	130.9	207.1	228	185.1	262.8	229.7	231.3	223.7	224.9	176.4	227.3	190.2	199	233.5	272.3
BDH1	60.5	48.6	13.4	37	22.2	17.1	6.2	14	30.2	15.4	29.5	20.1	36.1	41.1	12	50.3	9.2	12.7	10.2	25.6
BDH2	563.8	518.5	640	346.9	482.1	562.5	366.3	323.9	452	367.9	596.4	406.8	345.4	616.3	555.6	591	678.2	698.7	554.3	492.8
BDKRB1	37.2	38.3	49.4	70.5	64.5	83.4	188.2	209.9	57	55.6	39.2	51.6	81	10.2	15.9	37.3	65.8	57.3	66.6	128.1
BDKRB2	79.6	420	260.5	356.4	593.1	676.9	926	811	292.9	139.2	181.4	134	148	207.3	195.6	177.6	122	155.8	269.9	255.8
BDNF	18	29.7	9.5	25.2	20.6	39.8	39.3	40.8	27.8	29.1	61.7	17.6	24.4	23.6	30.7	24	23.7	23.2	21	65.4
BEAN1	53.6	38.3	47.6	44.6	45.8	38.6	86.1	73.8	36.5	63	67.9	35.2	37.4	71.4	38	65.7	35.8	37.4	39.2	48.3
BECN1	406.3	390.1	223.55	268.6	296.65	296.35	245.15	161.1	292.45	329.65	280.95	284.1	312.25	280.4	239.2	323.65	273.3	210.15	219.25	228.2
BEGAIN	41.2	104.7	82.7	233.7	105.1	92.1	111.7	126.1	170	113.9	134.2	114.1	92.6	114.6	55.5	87.9	126.9	98.6	76.2	103.4
BEND5	48.9	39.4	39.3	32.1	43	62.1	64.3	68.6	49.7	48.4	60.3	55.3	75.8	64.9	66.5	43.5	28.3	54.3	53.5	79.8
BEST1	47.5	36.4	47	67.8	25.1	39.2	34.2	49.7	38.7	38.2	17.7	41.3	21.4	59.7	24.5	31.9	30.8	25.4	34.6	40.9
BEST2	4.9	24.9	21.4	22.4	40	49.9	73.2	36.3	38.2	57	27.4	13.8	9.4	33.7	13.6	63.9	22.8	34.3	36.9	51.4
BET1	223.7	90.1	139.5	101.3	100.4	218.1	144.1	62	144.6	168.6	179.9	207.6	197.2	221.4	174.5	187.6	179.8	253.9	211.3	174.5
BET1L	22.3	25.6	27.1	2.9	16.8	10.8	32.8	28.1	38.3	15.8	34.3	12.9	25.2	28.5	27.8	8.7	6.4	24.8	12.6	21.6
BEX1	59.5	38.6	65.8	86.1	81.8	63.6	89.8	100.2	36.1	109.4	82.4	66.6	50	54.1	44.1	72.1	57.1	28.8	38.2	109.4
BEX4	169.6	213.1	127.8	160.8	153	268.6	89.3	129.4	320.4	136.5	113	256.7	354.4	106.9	263.3	121.9	195.3	266	176.2	134.9
BFAR	211.1	185.8	246.6	173.3	171.4	133.5	211.6	153.9	184.6	167.5	173.3	181.5	206.5	158.3	164.1	132.2	128.4	162.1	179.7	169.4
BFSP1	2.7	5.7	20.1	5.2	6.4	5	23.4	3.7	13.4	6.8	8.4	30	2	30	5.2	22.1	14.7	2.2	17.4	6.3
BFSP2	23.4	34.5	17	10.5	2.8	4.9	2.4	10.2	4.9	33.9	30.2	11.5	3.8	4.8	9.1	30.1	8.4	5.8	6.6	34.2
BGN	1077.23	298.233	184.5	353.733	264.4	278.233	417.367	589.2	475.633	238.5	1960.43	761.1	713.033	1992.63	1237.83	1246.7	1692.93	1180.47	1097.37	646.2
BHLHB9	45.5	45.5	53.6	21	55.5	40.7	61.7	21.7	44.1	27.4	9.6	49.4	52.9	74.3	42.6	67.9	24.7	41.9	54.4	42.6
BHLHE40	552.85	933.3	545.45	1050.35	2315.7	1419.7	3315.55	2950.3	1012.15	643.15	600.45	698.55	932.4	802.1	560.1	682.4	495.55	643.2	741.25	202.35
BHLHE41	135.8	124.8	85.3	230.7	562.5	595.6	562.6	437.8	201.5	223.2	492.7	602.1	541.1	245.2	293.4	297.1	429	377.9	612.7	231.8
BHMT	8.9	13.3	40.2	5.4	30.1	20.6	100.4	23	19.1	6.7	43.9	25	27.5	10	39.9	15.4	62.3	29.8	18	27.5
BHMT2	121.8	94.9	94.8	97.2	129.9	139.4	161	173.3	117.9	184.1	96.6	155.7	175.5	173.3	154.2	105	80.6	91.8	96.7	101
BICC1	65.8	88.95	139.15	78	124.05	116.15	132.2	97.45	96.15	112.15	170.15	114.65	83.2	130.3	101.35	154.65	120.95	119.7	134.55	169.25
BICD1	30.6	26.3	45.6	38.1	42.5	43	64.55	61.35	35.9	58.75	101.3	27.45	57.5	46.55	53.4	34.45	33.1	51.6	56.7	77.05
BICD2	135.1	92.1	117.767	107.367	104.9	113.4	57.4333	69.3333	93.0333	96.5	101.5	126.567	179.433	121.867	125.033	111.233	101.833	137.7	153.067	97.8
BID	139.75	91	57.35	108.65	136.65	99.05	129.55	98.8	66.95	86.85	99.1	142.35	220.4	89.3	109.25	138.2	136.4	117.2	117.8	131.2
BIK	15.5	6.6	14.6	8.2	14.9	7	11.7	23.7	13.7	20	18.1	6.3	12.4	20.7	15.8	9.7	17.1	21.7	11	17.4
BIN1	219.1	284.1	242.82	493.52	332.86	171.94	250.86	527.8	396.52	303.32	192.76	299.02	251.92	256.34	200.86	188.78	291.92	301.04	306.04	244.26
BIN2	15.6	19.5	20	19.1	7	12.7	11.2	8.6	14.8	16.7	17.5	61.1	82	40.8	76.6	30	8.3	8.8	48	17.7
BIN3	230.3	319.4	251.8	231.3	455.4	201.6	314	652.7	311.3	294.5	234.8	235.7	239.2	254.9	213	261.1	235.9	265	258.4	211.2
BIN3-IT1	45.4	51.5	60.2	99.5	97.3	97.6	65.9	124.8	43.3	66	35.6	29.6	26.6	58.8	47.7	35.3	30.7	10.7	39.6	35.9
BIRC2	518.1	530.7	636.1	514.6	258.1	777.9	262.1	555.2	407.3	236.8	405	524.5	524.1	599	512.2	395.6	310.4	375.3	425.9	305.7
BIRC3	28.7	23.8	37.1	50.5	54.2	29.3	144.2	62.2	18.4	31.3	39.2	24.4	10.8	44.7	33.5	18.8	35	35	38.5	42.3
BIRC5	20.4667	41.6667	41.0333	32.9667	30.6333	22.5	46.2333	35.5667	25.6	62.2667	48.0667	36.4	41.1667	41.9667	22.9333	33.4333	26.8333	38.4333	46.4	71.8667
BIRC7	34	46.7	64.6	73.2	54.5	49	81.3	82.4	49.2	84.2	70.3	86.8	34.1	53.1	54.1	20.8	157.5	63.8	69.8	98.8
BLCAP	310.1	311.7	240.4	319.8	350.5	295.7	286.4	321.5	358.1	320	297.8	373	342	344.6	313.4	316.1	463.5	457.6	447.6	396.2
BLK	25.25	36.35	19	22.2	25.65	15.3	31.25	36.7	17.15	43	21.3	46.35	20.15	33.4	11.75	27.45	24.95	18.6	36.45	49.3
BLM	115.8	78.7	145.6	141.9	82.5	106.2	147.7	108.5	103.9	144.9	116.5	109.3	74.6	92.3	89.5	91.9	111.8	88.5	92.7	142.3
BLMH	106.1	114.8	27	130.3	99.9	84.1	130.5	18.4	102.6	123.3	152.9	104.8	15.2	101.5	102.2	117.3	122.3	106.4	127.6	160.2
BLNK	108.9	63.5	70.9	49.8	57	93.9	46.6	44.7	80.1	56.1	135	168.1	261.4	125.9	180.1	118.9	146.7	274.3	180.6	163.2
BLOC1S1	164.2	292.5	309.5	311.9	211	234.4	332.9	332.8	302.2	400.9	357.7	302.2	247.5	433.3	298.8	547.3	454.6	433	393.2	418.4
BLVRA	302.4	192.4	154.275	150.85	159.95	222.95	173.7	177.025	211.7	210.05	221.575	229.3	296.4	205.325	194.575	352.975	206.025	232.45	213.775	210.8
BLVRB	269.6	361	227.5	149.9	178.1	283.9	212	152.6	317.8	324.1	177.9	268.4	473.6	219.4	202.6	359	173.4	370.5	199.9	227.8
BLZF1	10.3667	12.8333	16.9333	10.3667	7.06667	13.5333	9.16667	7.63333	8.23333	13.8667	14.0333	13.1667	13.3333	12.8333	16.0333	14.8	20.3333	14.7333	10.9	14.1
BMP1	86.825	60.3	79.825	111.325	122.9	57.4	132.65	92.025	122.95	115.5	148.65	133.5	97.575	148.625	104.95	124.525	178.45	149.775	117.825	117.8
BMP10	67.7	47.8	57.9	40.3	52.6	23.9	41.9	106.5	47.1	105.4	78.4	45.8	86.4	40.9	59	50.9	52.9	59.3	52.1	67.8
BMP15	51.5	62	94.7	61.9	72.1	57.8	112.6	108.1	48	123.3	89.7	69.9	60.2	68.8	57.5	76.2	89.3	73.3	75.5	108.5
BMP2	38.6	99.25	73.55	64.45	95	108.8	139.2	301.7	65.5	61	41.15	33.5	35.6	63.6	38.35	58.9	57.4	41.4	68.7	52.05
BMP2K	37.425	24.55	15.675	26.775	30.225	40.775	21.55	13.65	28.925	30.35	47.3	40.775	109.725	26.6	57.4	59.025	48.65	79.925	41.65	37.5
BMP3	21.8	38.6	60.7	39.7	4.9	18.9	33.3	42.4	7.4	44.7	50	32	53.1	40.4	38.3	42.8	25.3	40.7	25.7	57.4
BMP4	131.7	38.8	11	23.5	22.8	6.7	8.9	10.4	7.5	19.7	32	75.2	21.5	23	19.4	14.7	8.8	9.5	23.1	10.3
BMP5	73.55	88.65	52.8	35.3	34.5	77.2	27.7	60.85	63.4	80.3	32.85	33.7	36.75	55.2	32.15	121.1	48.05	23.4	44.9	75.35
BMP6	41.85	59.5	54.05	41.7	75.25	66.7	71.65	85.15	80.85	66.85	33.4	69.4	49.55	57.1	80.8	93.85	102.25	85.8	87.6	96.4
BMP7	25.825	23.75	23.175	38.05	14.725	23.8	22.775	39.675	15.65	61.2	53.2	40.275	29	35.325	31.475	29.8	26.875	24.225	31.275	55.6
BMP8A	7.53333	11.6	7.8	13.3	29.4	10.7	30.0667	10.2333	7.73333	14.7667	22.9667	16.2	23.3	19	11.5667	12.9	15.5667	7.63333	20.5667	22.3333
BMP8B	40.7	42.9	20.45	11.9	17.05	23.35	35.85	41.15	14.3	54.2	36.25	23.8	40.65	31.05	26.35	42.1	21.3	16.55	35.75	55.15
BMPR1A	135.85	115.95	128.25	137.05	187.3	220.25	45.4	93.25	149	121.85	125.25	100.4	130.7	128.25	130.35	137.75	112.35	139.3	136.6	120.05
BMPR1B	2	16.2	10.2	8.3	6.5	7.7	12.6	14.4	4.8	14.4	24.7	5.2	6.1	10.4	5.7	35.9	2.9	7.6	11.1	16.4
BMPR2	61.1	62.75	78.9	50.15	59	52.1	98.8	75.9	52.45	48.65	46.15	80.55	52.65	93.95	68.75	50.95	39.4	40.6	57.35	69.2
BMS1	380	222.9	180.5	206.9	193.6	98.1	198.4	175.3	128.7	201.9	220.7	167.2	112.6	99.9	139.1	168.1	173.7	96.4	113.7	150.9
BMX	14.2	7.2	11.1	13.8	39.3	16.6	19	61.9	14.1	14.2	8.1	35.7	21.7	28.9	9.8	11.5	10.5	11.5	11.1	17.8
BNC1	34.8	35	30.8	65.1	5.6	5.7	2.8	41.1	6.8	30.2	43	36.8	10.6	23.2	20.3	21.8	15.6	3.1	35.8	40
BNC2	124.2	88.3	166.2	89.6	165.3	180.3	164.1	198.2	117.8	202.1	329.1	130	153.7	146.1	100.8	80.1	160.7	146	175.6	256.3
BNIP1	38.7333	26.6	38.5333	33.3667	71.2	41.9667	67.7333	63.3	38.3667	41.8	72	31.9667	56.4	44.7333	41.7667	58.9333	62.5667	64.4	56.5	72.8667
BNIP2	180.8	241.9	138.1	224.2	204	285.7	175.7	160.7	173.8	134.7	123	160.9	199.4	197.2	152.8	210.8	160.3	130.5	104.1	71.7
BNIP3	150.7	420.3	199.9	167.35	218.65	299.75	423.45	394.85	375	197.2	72.45	98.6	167.8	102.15	84.15	90.65	124.5	112.1	130.5	125.8
BNIP3L	494.75	809.35	658.15	689.85	967.25	911.2	842.2	846.05	813.7	542.7	521.75	562.9	873.1	551.2	667.85	530.1	518.55	625.5	447.6	444.95
BOLA1	50.1	51.9	103.7	46.3	36.6	37.5	57.6	58.1	65.1	72.9	72.2	40.5	84.8	63.1	66	71.7	65.5	65.1	69.5	82
BORA	32.3	33.4	35.7	62.9	43	41.8	49.4	35	33.8	65.3	53.1	45.4	29.2	31.4	62.7	70.9	76.5	41.5	35.4	63.2
BPESC1	0.5	1.1	1	0.8	0.9	0.6	0.4	2.1	0.5	1.3	1.4	2.1	1.7	1	1.4	1	1.3	0.6	1.2	1.5
BPGM	63.7	75.7	57.4	56.8	60.5	82.9	50	40.9	51.1	96.9	95	75.1	93.1	64.2	66.1	85.2	47.1	57.4	74.9	74.9
BPHL	21.7	7.6	15.1	4.6	23.8	32	64.2	50.2	40.8	35.1	37.2	39.2	58.8	16.4	21.9	29.2	54.5	65.2	61.7	48.4
BPIFA1	71.4	75.3	95.3	74.5	124.7	110.9	154.1	161	86.4	142	84.1	95.4	61.9	47.9	88.3	73	80.2	104.3	91.9	146
BPNT1	17.3	8.3	6.7	19.9	19.5	15.7	15.7	4.5	17.6	32.4	3.7	22.5	17.6	2.1	8.1	12.5	31.1	4.4	21.8	36
BPTF	126.95	219.75	307.8	193.25	205.45	268.5	124.4	132.25	238.55	261.4	299.65	237.6	163.7	204.55	181	191.85	173.95	209.8	253.7	316.05
BPY2	2.6	1.8	3.2	5.9	4.7	3.3	3	5.6	2.2	4.2	6.9	2.4	2.3	3.7	5.3	2.8	2.3	2.9	3.1	5.6
BRAP	40.75	40.275	51.025	43.35	40.05	41.9	29.675	26.275	38.15	48.8	35.15	43.675	43.7	33.7	39.575	43.175	35.225	26.775	36.6	39.525
BRCA1	23.5	25.45	32.7	19.95	4.95	4.9	13.75	9.75	6.95	15	34.15	28.25	13.7	17.3	33.8	17.35	17.1	10.55	29.3	39.3
BRCA2	18.65	11.55	12	12.95	15.35	16.4	11.1	12.85	10.5	28.75	12.85	16.7	6.65	12.95	9.25	12.05	21.6	18.15	21.1	25.05
BRCC3	110.2	45.4	62.55	69.1	52.65	68.65	59.85	55.25	53.85	70	82.05	71.5	78.05	47.3	79	61.25	80.1	68.4	51.85	74.85
BRD1	212	170.6	223.9	165.95	156.95	147.5	79.85	122.25	163.95	134.55	136.55	124.75	271.9	132.55	135.5	120.55	146.25	113.95	153.35	109.05
BRD2	326.667	557.967	870.167	668	891.467	621.033	643.433	705.2	604.433	582.033	531.433	409	257.733	305.333	323.833	338.8	222.433	356.567	408.367	504.567
BRD3	222.8	317.2	246.55	203.05	359.6	255	194.35	195.65	354.95	358.5	463.15	196.45	213.2	219.8	225.4	237.25	254.95	266.65	277.55	390.75
BRD4	157.1	304.25	217.9	332.2	741.55	330.25	529.05	909.95	506.4	518.45	318.55	198.25	165.2	144.55	141.15	148.6	95.35	331.15	240.2	285.55
BRD7	71.5	139.9	136	138	124.4	120.6	142.8	102.3	166.5	192.1	165.2	114.7	40.6	129	143.2	150.2	198.8	156.6	169.2	161.3
BRD7P3	4.3	3.3	5.1	5.5	4.1	5.3	5.9	20.1	3.2	11.7	17.6	3.6	3.7	10.1	7.1	5.9	4.1	7.3	4.7	10.2
BRD8	165	147.8	178.7	99	113.3	158.5	91.85	78.95	138.85	170.05	174.9	118.2	120.1	125.4	100.95	125.75	117.4	104.9	125.1	143.15
BRD9	162.7	200.7	206.3	234.8	167.8	67.7	68	276	124.2	193.9	289.3	126.4	146.4	233.8	152.5	207.9	126.8	143	175.7	111.8
BRDT	4.9	1.9	1.5	3.6	1.4	14.4	3.9	6.5	9.1	3.1	18.6	2.6	10.6	1.9	1.1	8	1.3	1.4	3	10.8
BRE	229.467	151.367	214.133	327.033	142.367	147.467	119.167	181.6	157.067	167.433	159.867	181.8	243.633	169.067	180.033	193.367	162.2	189.633	191.467	223.7
BRF1	13.0333	11.3667	12.1	7.5	17.1333	12.3333	14.9	18.2	19.7667	9.5	13.3333	10.7667	16.0333	12.8	20.5333	11	23.2	20.3	10.5667	28.2
BRF2	96.75	85.3	130	91.2	88.4	83.85	150.65	88.55	91.65	115.4	97	138.7	147.5	122.8	132.4	121.35	119.25	111.75	145.55	116.4
BRINP1	40.4	43.5	92.4	54.6	64.6	67	61.3	76.1	46	72.4	67.2	93.2	84.3	33.8	201.6	64.8	116	118.1	81.2	126.4
BRINP2	5.4	5.9	5.7	4.6	9.3	7.5	10.2	11.5	7.1	10	9.3	6.3	5.1	7.3	5.6	7.3	10.9	7.8	9.1	11.4
BRINP3	9.8	3.4	16.5	3.6	0.7	1.7	1.9	2.8	2.6	2.7	1.6	0.9	1.9	2.1	3.8	3.9	1.9	2.5	10	2.7
BRIP1	9.5	14.8	3.3	17.1	1.7	1.1	1.7	4.5	1.4	10.8	12.3	20.5	13.7	1.1	21.2	9.5	1.7	3.5	6.5	20.9
BRIX1	79.8	55.1	48.7	83.5	78.9	66.8	55.1	57	16	22	72	39.1	29.8	45.1	17.8	8	67	29	32.4	43.5
BRMS1	191.7	196.1	184.7	240	237.7	91.7	137.6	165.2	193.1	203.9	187.7	157.1	172.2	181.8	158.8	156.1	186.2	126	153.6	159
BRPF1	104	98.1	88.5	116.3	159.6	113.5	70.1	106.8	104.4	125	113.1	74.5	71.5	76.4	72.2	92.6	127.8	88.8	97.7	92.4
BRS3	29.8	23.5	45.1	52.8	31.2	50.7	40.6	59	20.8	66	60.5	50.8	45.8	51	57	46.5	59	23	31.5	84.6
BRSK2	18.6	1.6	21.4	2.9	3.2	1.8	1.9	2.5	2.3	2.7	6.4	20.5	2.4	5.8	1.7	2.6	1.9	1.7	1.4	2.8
BRWD1	11.05	12.35	10.25	10.3	18.9	11.65	14.55	3.55	14.7	17.65	22.45	22.3	3.5	31.2	29.7	15.95	37.25	22.15	20.6	25.25
BSDC1	135.95	186.8	185.05	178.9	205.35	200.4	151.6	227.75	195.75	153.15	148.65	149.75	165.15	163.05	142.85	131.85	163.6	188.25	132.9	126.55
BSG	238	314.5	288.6	225.6	361.7	132.7	478.4	253.1	382.1	283.5	339.8	430.2	313.7	402.7	344.6	399.6	363	460	300.6	286.2
BSN	7.3	9.2	9.7	8.3	12.3	14	17.2	20	10.6	18	10.2	3.4	8.2	12.2	6.4	12.4	15.1	14.1	12.2	17.6
BSPRY	33	23.1	39.6	47.7	9.6	4.3	18.8	10	8.7	22.3	65	30.3	33.3	51.4	11	44.4	5.1	3.6	48.8	14.1
BST1	63.2	5.8	61.4	27.7	9.7	4.1	7.6	7.9	36.7	9.7	18.4	61.7	72.1	70.4	48.5	56.5	34.5	65.1	41.1	10.4
BST2	410.7	332.1	488.4	410.8	127	80.4	168.1	204.1	219.6	358	224.4	342.4	970.1	425.3	596.8	364.3	422.4	399.8	401.9	515.7
BTAF1	149.1	108.9	157	159.9	202.4	178.4	113.7	172.5	161.8	103	159	94.2	174.4	135.7	91.2	90.2	180.1	120.6	129.2	114.5
BTBD1	274.7	256.5	244.7	358	352.5	449.9	347.7	400.9	238.9	238.5	252.8	331.7	280.5	236.8	270.4	261.7	373.7	332.7	255.2	207.8
BTBD18	7.9	30.1	5.7	2.7	5.8	3.6	5.7	9.4	4.6	11.4	18.9	4.6	8.7	5.1	4.6	2.1	4.6	3.3	24.4	7.4
BTBD2	4.5	40.7	78.6	50.1	33.9	8.3	14.8	13.6	124.6	95.1	88.8	58.3	22.1	76.5	62.4	39.6	173.7	88.5	118.1	61.4
BTBD3	99.2	63.6	72.8	67.6	102.3	126.6	46	70.7	107.6	67.2	126.4	74.8	80.5	115.6	87.4	57.1	80.2	70.8	109.1	75.3
BTBD7	17.15	13.15	15.95	21.2	10.95	25.9	6.6	15.35	4.75	17.4	22.6	3.95	9.7	23.35	12.4	27.85	11.25	13.65	10.9	17.5
BTC	38.1	25.7	17.8	26.8	15.2	4.3	2.2	3	3.7	22.2	14.7	76.5	41.7	42.9	127.6	60.2	74.4	61.2	64.3	29.5
BTD	90.8	96.5667	88.2	67.9667	34	55.5	51.9333	52.8333	84.1	83.6	62.3	97.9667	46.5667	91	84.7333	88.9333	73.0667	88.8333	85.3333	79.7667
BTF3	2222.57	2024.7	2358.6	2244.03	1869.8	2483.07	2222.47	1862.67	1924.3	1684.2	1279.13	1661.73	1170.03	2034.9	1786	1897.8	1795.23	1406.53	1260.87	1554
BTF3P11	4.2	6.2	1.8	15.9	0.8	0.7	1.3	1.3	1.5	0.9	2.6	0.8	0.8	11.8	9.5	1.6	1.7	0.7	1.9	1.4
BTG1	1889.5	2499	3196.65	3111.6	2980.05	2925.8	3265.8	3502.4	2316.1	1905.15	898.4	848.85	1304.9	1363.25	1202.75	802.1	1070.6	1227.85	1059.75	996.15
BTG2	457.05	736.05	828.1	813.55	753.25	914.85	791.6	699.75	696.5	770.15	149.15	236.1	191.85	409.9	321.65	207.9	211.05	253.65	212.95	265.05
BTG3	232.333	352.567	246.633	368.1	446.167	461.267	393.033	433.333	259.5	210.633	135.933	146.967	162.633	141.6	128.733	145.167	158.733	161.767	132.9	135.7
BTG4	1.5	1.6	2.6	2.5	4.1	3.7	3.5	3.5	2.1	7.3	20	5.3	2.1	4.8	7.3	4	8.4	4.4	5.8	8.3
BTK	90.8	74.6	65	49.6	39.8	66.1	56.1	52.2	56.2	61.3	109.1	78	68.2	72.3	139.9	104.9	142.4	155.2	101.2	108.4
BTN1A1	44.5	44.1	21.2	46.9	49.5	47.5	47.5	66.3	36.3	57.9	36.9	61.5	69.2	44	37.8	50.5	56.4	33.8	42.2	69.8
BTN2A1	197.233	165.567	173.567	149.833	173.967	221.533	162.2	148.167	158.067	186.367	182.7	209.767	181.567	182.8	167.933	178.1	203.733	183.333	212.833	213.5
BTN2A2	48.95	45.7	50.7	62.4	67.6	53.2	49.2	11.35	59.6	75.35	64.85	71	77.1	69.1	78.65	82.05	71.65	59.5	79.45	78.25
BTN2A3P	42.2	42.3	68.2	43.7	20.9	9.3	37.3	14.2	20.6	87.8	80	34.2	48.9	28.7	38.9	52.2	24.2	35.9	40.9	81
BTN3A1	70.05	63.85	69.1	80.05	30.5	58.15	66.15	88.85	40.5	93.6	224.8	112.25	143.25	133.9	121.85	126.95	99.95	143.15	163.35	175.85
BTN3A2	79.95	61.75	83.65	71.45	16.5	53.7	46.55	24.4	57.45	155.6	187.45	96.35	132.2	175.4	130.7	92.4	129.2	112.05	147	154.6
BTN3A3	47.35	36.9	46.95	53.65	17.45	60.8	26.85	32.1	35.9	67.55	88.8	106.7	80.15	138.9	102.3	82.25	96.55	69.65	97.7	78.6
BTNL2	6.8	6.3	15.7	10.9	9.2	7.9	11.8	12.7	4.3	12.1	9.6	5.9	9.7	11.5	10.2	41.3	4.8	7.1	8.7	10.8
BTNL3	94.2	175.9	100.3	110.2	31.9	73.3	103.1	136.9	85.8	167.4	148.7	122.8	109.6	131.2	88.5	135.8	129.3	83.5	133.8	200.2
BTNL8	3.4	3.9	8.2	5	4.5	4.3	7.3	9.9	4	8.1	19.5	3.4	2.6	6.3	5.4	11	3.5	7	4.3	6.9
BTRC	59.5667	44.2333	45.0667	25.4	45.0667	31.7333	35.0667	38.8333	40.5333	58.6	35.6333	48.7	34.0667	31.9	35.4	46.3	47.1	40.4667	46.5	47.6667
BUB1	10.06	4.86	10.96	8.68	4.1	5.76	4.36	5.5	4.22	8.7	13.26	8.06	12.9	13.5	7.86	10.48	7.56	6.34	8.02	14.9
BUB1B	21.2	11.5	12.5	42.9	41.9	51	32.9	58.2	42.5	25.3	30.7	54.5	48.7	51.3	26.1	29.5	42.6	56.3	56.5	63.7
BUB3	451.8	307.125	308.05	326.925	191.775	321.5	225.225	129.525	301.05	279.675	306.025	322.2	403.575	318.375	328.25	356.575	247.8	232.425	284.75	215.025
BUD31	195.85	168.4	119	134.25	129	94.65	101.05	99.35	97.7	103.75	160.85	134.25	227.8	160.85	116.35	170.5	111.5	97.95	125.95	141.6
BYSL	97.1	69.4	85	81.6	107.6	36	197	155.4	30.3	132.7	58.1	107.4	34.9	48.8	54.6	78.5	87.2	61.5	111.6	97.8
BZRAP1	17.8	39.7	69.5	43.8	47.9	35	51	56.2	51.5	80.6	74	38.4	30.5	48.1	39.2	6.9	50	24.3	18.8	41.4
BZW1	1596.05	3195.15	1986.1	1848.55	890.15	2223.7	1319.85	979.25	1893.4	897.1	503.65	604.8	384.45	561.9	1122.15	714.3	853.65	1004.85	735.55	497.25
BZW2	620	389	428.5	746.4	344.1	374.7	729.5	463.7	296.4	346.4	375.4	299.5	430	277.4	364.9	273.2	291	173.8	306.9	326.2
C10orf10	2389.9	994.2	2407.8	553.7	2036.9	1230.05	3243.45	1885	2120	2005.55	328.65	282.25	386.2	486.55	206.8	368.9	397.45	405.7	349.35	362.75
C10orf12	9.5	9	12.2	9.85	3.8	4.15	5.1	5.4	3.4	7.95	14.5	3.2	12.35	8.85	4.3	23.85	4.9	2.4	8.5	15.4
C10orf2	69.4	44.8	35.2	90.9	31.9	43.6	46.9	87.4	34.1	56.6	51.4	43.6	54.1	35.2	62.9	32.7	54.3	14.3	30.6	53
C10orf76	32.35	83.85	109.65	77.5	56.95	29.85	38	39.8	46.65	49.2	48.35	49.4	32.8	85.8	72.9	39.85	45.4	46.95	90.65	43.55
C10orf88	63.2	45.8	47.2	50.7	19.4	52.9	30.8	33.6	34.3	68.6	69.7	61.8	67.4	52.1	68.5	47.9	9.7	40.9	71.4	81.6
C10orf95	2	2.3	5.6	2.9	7.7	5.3	9.1	11	7.5	6.3	5.2	3.3	2.3	6	3.6	4	11.7	9.6	6.3	6.1
C11orf1	5.4	8.7	9.6	2.8	4.8	1.7	0.9	3.6	1	11.3	13.1	8.6	9.3	14.4	9.6	9.9	0.9	0.9	6.5	18.8
C11orf16	17	11.9	25	19.8	11.5	11.9	19.2	15.5	6.7	21.3	15.8	11.4	11.2	9.8	19.5	18.7	8.5	8.5	14.7	24.5
C11orf21	52	56.5	72.9	58.6	56.7	60	80.6	71.8	49.9	118.2	73.8	51.2	65.1	61.6	52.9	77.7	91.8	68.6	71.4	97.8
C11orf24	124.85	114.55	82.95	138.45	178.4	87.55	159.85	161.75	120.85	138.95	252.6	196.7	189.45	147.05	164.05	159.75	227	242.9	166.2	153.65
C11orf30	12.1	27.9	32.6	16.6	19.2	33.9	2.3	25	19.7	18.7	23.9	17.5	28.5	12.7	9.8	23.6	16.9	16.8	29.2	24.9
C11orf49	246.7	125.7	196.2	215.8	103.1	127.6	148.7	188.7	127.2	158.6	144.6	137.3	288.5	216.5	154.7	180.8	114.8	108.8	131.9	157.8
C11orf57	124.3	183.1	155.5	164.8	178.6	169.8	95.9	97.1	121	164.1	194.9	125.9	132.9	120.6	125.7	152.6	151	113.7	145.7	145
C11orf58	1440.45	946.65	689.45	644.95	638.3	1082.3	861.55	445.85	835.9	670.85	550.2	656.55	1016.1	709.5	876	937.2	812.9	885.3	705.35	500.2
C11orf63	53.5	41.7	79.2	44	28.3	52.8	15.3	42.8	52.9	64.6	88.3	56.8	40.9	67.2	80.9	51.1	53.9	60.4	83.5	66.8
C11orf68	105.4	229.4	279.6	185.6	267	246.2	240.1	246.9	356.2	245.1	239.9	194.7	182.3	200.9	205	191.9	238.4	259.2	299.9	313.1
C11orf71	68.4	71.4	87.5	94.5	72.9	125.9	86.6	68.5	91.7	128.1	43.4	83.2	148.8	71.9	78.1	73.9	97	76.5	91.2	129.5
C11orf73	183.6	77.7	36.9	52.4	45	65.9	91.6	52.2	55.3	58	64.6	54.8	215.4	64.1	65	71.6	63.4	69	62.7	73.4
C11orf80	1.9	1.7	2.8	6.5	2.3	2.1	2.2	3.4	4.1	3.2	6.3	3	4.7	2.3	1.9	2.8	4.7	20.6	2	6.7
C11orf95	158.7	190	161.3	223.8	321.2	259.1	140.5	237	219.9	225.7	258.8	216.5	154.6	218.7	141	258	186.7	134.3	307.8	227.4
C12orf10	90.6	156	147.4	141.6	213.4	69.9	158.1	143.4	254	200.8	168.1	122.3	166	160	138.2	168.9	264.6	204.8	239.7	239.4
C12orf29	134.7	169.9	125.9	86.8	79.3	135.8	87.4	45.4	94.3	93.5	47.6	87.2	96.2	95.5	95.7	108.2	79.9	59.1	77.5	71
C12orf4	94.2	58.3	109.7	81.7	106.3	108.7	124.1	101.1	64.5	99.5	125.1	128.8	57.3	104	109.4	121.3	163.9	120.8	100.4	116.7
C12orf43	61.8	69.5	81.5	104.4	128.2	78.8	62.3	69.2	75.1	114.6	85.8	91.7	60.1	92.8	69.5	100.7	64.9	88.5	110.4	79.5
C12orf49	110	124.6	148.2	131.8	170.1	144.8	149.8	132.1	84.6	206.3	157.9	184.9	150.2	160.2	135.9	130.4	143.2	138.2	169	234.8
C12orf5	146.4	54.9	67.2	64.1	42.1	54.7	93.7	52.2	49.4	76.5	60.3	116.8	125.5	66.3	119.2	88.7	107	147.2	66.6	70.9
C14orf1	77.4	47.4667	60.5333	48.8667	42.8	32.0333	30.1	40.6667	36.3333	40.1	60.1333	70.0667	105.567	69.0667	67.5333	34.9	48.3	51.3	101.1	76.2
C14orf105	0.3	0.5	1.8	1.8	0.6	0.5	1	1.2	1.4	2	12.2	0.3	1.3	2.9	0.8	1.5	0.8	0.3	0.4	0.7
C14orf132	222.2	461	512.4	222.5	293.2	513.9	84.6	169.7	297.6	165.2	463.6	753.2	514.3	590.2	669.3	963.1	386.6	498.9	885.6	581.5
C14orf159	123.1	86.5	95.2	70.9	108.3	108.7	101.6	112.6	130.3	118.7	68.2	122.6	227.2	142.6	145.4	99.2	159.7	197.7	136.6	140.2
C14orf166	673.4	999.9	793.1	947.1	1131.7	1181.7	1282.1	1009.5	1006.4	1086.3	1038.2	1061.5	892.1	1088.4	1078.4	947	1214.9	1135.9	1094.1	953.8
C14orf169	134.9	130.2	160.4	169.4	147.6	161.5	136.8	119.5	135.3	160.1	163.2	163.7	176.5	149.7	153.9	150.1	190.2	200.4	172.3	165.1
C14orf2	682.25	594.95	531.75	546	371	432.35	454.5	379.55	545.35	456.6	570.9	700.65	527.35	818.65	607.9	823.45	486.55	535	644.45	352.35
C14orf79	8.7	9.4	15.3	11.3	8.7	7.5	14.6	11.1	14.9	8	13.6	10.7	36.4	9.6	42.8	13.4	14.2	11.5	18.9	35.9
C14orf93	42.1	32	67.4	14.3	41.9	42.4	21.3	26.8	34.8	51.9	30.8	43.1	44.4	62.3	28.5	75.3	38.9	27	35.1	49.6
C15orf39	75.5667	81.3667	110.067	123.767	150.933	116.133	107.067	185.533	129	116.867	121.8	95.9	89.7	74.9667	74.4333	102.467	96.9333	94	105.433	132.833
C15orf49	7.9	31	80.3	10.8	15.8	10.8	13.8	32.1	10.6	20.9	14.1	75.5	26.2	18.4	13.5	39.2	14.3	13.2	52.7	27
C16orf3	20.3	57.6	9.9	35.6	10.2	5.9	18.3	14.7	7.3	17.5	59.6	18.3	15.6	3	15.5	29.8	27.8	8.5	26.2	11.6
C16orf45	185.1	232	232.7	212.8	314.1	207.7	170.2	587.3	297.6	183.9	322.8	351.1	306.8	368.1	323.6	320.2	287.8	207.8	277.5	348.9
C16orf58	51.4	60.15	86.9	119.45	59.9	63.2	80.6	96.2	119.85	124.8	64.7	129.95	95.05	70.85	98.9	73	153.35	106.8	131.45	82.3
C16orf59	4.9	5	7.3	7.1	14.9	8.2	8.9	12.8	8.8	13.8	14.8	12.7	5.6	9.7	5.7	4.8	11.4	10.3	11.8	6.8
C16orf62	214.5	160.6	96	179.8	16.1	62.6	70.1	74.8	117.4	102.5	178.1	196.3	155.7	145.6	119.9	171	121.4	101.9	201.7	127
C16orf70	12.2	4.8	4.5	4	2.9	2.3	5	4.6	2.9	7.7	10.9	4.5	4.9	3.4	6.3	6.7	2.1	2.2	1.9	3.8
C16orf71	2.9	8.3	4.8	21.5	5.9	8.8	5.3	7.7	10.9	12.2	4.7	22	2.6	4.3	2.5	4.5	15.5	9	7.8	5.1
C16orf80	435.2	294	403.1	353.9	372	391.9	212.2	220.3	189	228	226.6	209	242.8	253.6	246.5	258.7	279.6	193.4	234.5	224.8
C16orf95	11.2	56.65	43.35	25.7	12.55	23.4	15.75	17.25	42.6	15.85	11.9	43.3	25.75	28.7	23.85	20.9	55.4	14.45	38.75	34.2
C17orf53	7.9	9.3	5.9	19.2	38.5	10.1	21.6	29.1	11.6	13.9	11.6	20.8	8.7	20.8	26.5	32.7	17.3	7.1	11.9	19.9
C17orf59	10.1	36.6	15.8	6.3	10.8	9.2	14.4	11.2	35.2	11.8	14.1	21.5	28.1	12.3	25	6.1	16.3	5.9	32.8	19.8
C17orf62	158.6	97	156.5	114.4	183.7	60.7	121.2	107.1	137.2	130.8	150.3	155.6	194.9	133.4	160.3	130.3	161	181.9	138.4	157.1
C17orf70	169.6	93.4	100.7	86.8	122.9	83.4	148.6	140.6	99.7	121.3	102.6	104.4	119	117	104.5	78	116.3	170.8	122.4	160.9
C17orf75	9.5	5.1	14.3	16.6	1.6	2.4	0.9	2.5	7.6	2.6	15.7	10.1	13.3	19.9	18.3	11.5	1.9	1	4.5	1.7
C17orf80	18.9	5.6	4.6	19.7	6.2	6.5	9	9.8	5.4	12.3	8.8	39.7	16.9	7.3	4	8.2	4.9	8.1	8.9	13.2
C17orf85	107.1	148.4	138.6	148.9	133.8	158.3	117.9	124.1	120.6	163.7	173.4	126.3	115.5	106.7	120.8	102.6	118.6	134.9	142.2	176.6
C18orf25	43.1	35.7	34.9	36.9	20.55	28.6	21.05	32.05	27.1	34.95	20.8	29.5	18	16.2	17.75	36.9	22.4	26.15	30.7	39.8
C18orf8	144.9	139.2	131.7	105.6	203.3	170.1	137.6	156.3	169.6	185.9	114.7	160.8	159.4	117.5	109.7	99.1	176.8	116.5	153.3	160.8
C19orf10	472.5	263.95	211.1	409.35	345.75	172.8	419.35	381.35	325.95	314.65	397.4	559.3	662.5	590.65	509.4	488.55	391.15	566.3	429.4	384.5
C19orf24	63.1	79.1	58.5	70.1	45.1	38.8	71.3	129.4	68.1	50.7	127.6	46.7	88.2	65.6	66.7	94.9	110.3	69.9	79.8	61.7
C19orf26	11	1.1	2.6	2.2	1.6	1.8	1.5	3.3	2	2.1	4.1	1.1	1.2	2.1	2.5	3	6	1.6	1.5	2.2
C19orf40	47.5	22.3	27	55.8	48.7	65.5	53.7	66.6	64.4	82.9	69.3	33.8	52	46.2	22.7	26.2	55.7	40.2	56.5	94.3
C19orf53	365.2	440.4	300.1	283.7	506	235.5	743.5	327.7	433.6	471.6	348.6	423.5	445.9	414.8	415.2	310.2	441.7	561.6	453.9	503.1
C19orf54	114.4	92.8	128.7	162.2	128.5	140.3	104.2	106.5	121	131.8	131.7	87.8	115.4	105.5	110.9	86.9	108.2	143.7	115.1	124.6
C19orf57	42.2	11.2	80.7	13.5	13	16.1	17.3	59.8	8	40.6	18.8	14.2	10.7	13.8	49.2	23.9	15.1	13.4	19.6	21.1
C19orf60	84.8	116	97.3	110.35	100.55	65.55	87.1	182.7	111.9	176	184.85	147.25	171.15	186.2	121.1	111.95	240.15	197.2	217.65	235.85
C19orf66	114.15	158.9	112.35	136.95	198.65	199.65	169.6	143.7	222.85	246.85	255.9	227.15	177.6	131.7	162.05	184.2	256.9	208.75	280.05	320.15
C19orf73	6.8	5.3	5.7	51.3	9.7	7.5	5.7	11.2	23.5	7.5	20.5	2.7	3.6	3.7	3.7	16.1	77	12.6	13.8	26.1
C19orf80	4.9	4.5	5.3	83.3	8.7	2.7	4.4	5.8	4.1	203.9	8.3	4	4.1	7.4	21.7	15.7	4.1	1.5	3.1	6
C1D	150.1	194.2	100.3	110.2	120.2	261.1	114.7	133.5	158.2	146.7	123	96.6	157.8	91.3	109.5	123.6	136.7	149	125.7	127.3
C1GALT1	170.2	48.4	130.1	188.9	146.9	224.7	204.1	171.1	122.8	71.5	146.4	238.6	346	134.6	342	92.7	295.4	257.8	223.8	174
C1GALT1C1	357.7	198.8	156.6	196.7	113.9	220.4	138.3	94.2	150.3	236.7	217.3	292.3	285.6	308.6	484.2	235.3	222.4	411.3	239.1	200.7
C1QA	1529.7	2110.3	1056.2	877.2	828.1	593.4	986.5	593	1357.1	990.2	1263.1	2481.5	4267.3	1694.2	2588.5	3088.2	2432.3	3091.6	1452.5	1245.4
C1QB	1688.9	2787.5	1110.5	1565.7	759.2	895.8	1041.5	488.8	2571.9	1586.8	1183.5	2900.9	2944.3	1229	2556.1	2508.1	3347	3619	1715.2	1573
C1QBP	345.4	164.4	108.85	302.75	151	132.7	313.15	113.85	164.35	178.85	138.8	158.75	325.5	183.85	174.9	146	214.45	168.3	154.35	138.55
C1QL1	23.9	40.75	50.45	35.75	49	48.15	72.55	62	33	74.75	43.75	43.4	21.1	47.85	49.9	39.35	39.7	45.75	50.8	72.2
C1QTNF1	318.9	675.2	433.6	1200	343.5	214.9	705.4	622.8	461.1	594.9	296.8	279.7	230.5	318.2	270.8	241.2	371.9	300.2	285	329.8
C1QTNF3	97.3	37.1	84	35.4	81.6	38.2	49	71.9	49	171	528.6	268.3	147.8	430	259.5	407.1	339.7	169.2	161.1	226.4
C1QTNF9B-AS1	24.3	34.5	20.2	14.7	38.9	17.9	97.6	22.5	23.6	23.8	60.6	14.8	101.9	88	56.1	99.7	62.1	19	40.6	28.5
C1R	3832.1	2750.6	4405.9	3367.3	2662.7	2268.3	3982.5	3685.1	3349	2706	2763.5	2683.6	2532.3	3906	2676	2088.9	3275.6	2471.5	2778.2	3181.9
C1RL	532.3	312	405.8	433.2	565.4	446.5	533.3	342.8	522.8	341.9	209	196.8	248.9	184.8	231.7	126.4	325.1	297.2	237.7	228.1
C1S	5252.3	3618	5369.6	3787.9	2375	3821.1	4250.9	3593.5	3538.3	2850.5	3586.5	3720.1	2864.6	5324.1	4994.9	5238.5	4302.3	3375.1	3214.6	3727.1
C1orf105	51.2	51.3	79.6	48.7	83.4	88.9	108.7	139.7	51.7	143.2	104.7	47.6	51.2	56	36	44.1	48.8	51.2	72.6	138.1
C1orf106	7.5	31.2	24.5	55.9	82.7	41.6	74.4	44	42.8	68.4	54.2	33.4	36	20.9	31.9	42.8	29.5	56.6	57.9	65.1
C1orf109	70.6	37	44.4	9.3	57.2	66.4	37.4	30.6	40.8	52	35	49.6	46.9	21.1	35	54.3	45.7	76.4	36.5	59.3
C1orf112	50.7	74	45.1	42.6	3.6	6.8	3.2	8.9	16.7	48.3	26	22.3	22.5	7.9	12.3	18.3	5.6	3.5	26.1	8.1
C1orf115	107.9	118	73.7	95.9	190.3	183.2	154.1	127	178	137	125.2	84.4	131.3	175.3	61.5	171.1	83	59.8	192.4	176.2
C1orf116	3.7	3.9	4.05	4.75	4.5	4.2	5.8	9.25	3.45	5.85	5.45	4.75	3.95	4.15	3.65	4.6	6.25	4.2	4.75	6.7
C1orf123	267.1	206.2	263.7	281.6	186.3	201.1	232.3	167.7	227.5	225.5	250.5	356	216.9	438.3	363.8	363.2	305.9	217.3	304.9	286.9
C1orf159	34.2	37.7	42.3	55.6	98.6	52.4	107.1	153.1	79.7	77.1	52.1	49.8	44.5	56.1	41.8	11.7	86.3	48.3	65	86.3
C1orf174	204.5	100.6	144.4	95.9	174.8	154.1	96	80.1	147.4	154	158.6	142.6	303.1	150	120.1	129.2	127.6	132.9	179.3	187.5
C1orf21	42.4	151.3	61.7	112.1	64.2	43.6	8.5	11.6	83.2	22.6	20.4	6.2	7.4	68.9	4.4	76.4	36.2	4	9.3	9.4
C1orf216	102.9	141.4	132.8	135.2	127.3	115.1	183.6	138.7	161.4	196.5	246.2	155.7	118.2	189.7	123.1	221.6	146	207.9	191.6	174.1
C1orf27	146.6	173.6	129.7	176.8	152.5	144	140.8	183.2	117.6	148.5	151.6	95.5	73.8	101.4	160.5	86.2	62.4	108	87.5	126.8
C1orf35	57.7	65	92	61	48.5	45.7	48.7	72.7	47.4	92	82.2	68.7	77.1	57.5	65.1	80.7	72.9	54.7	66.4	75.5
C1orf50	99.7	110.7	120.1	56.6	14.2	61.9	15.8	12.1	43.5	33.2	76.5	75.9	91.2	128.8	57.2	80.3	14.8	13.8	65.2	70.2
C1orf54	191.8	388.2	193.5	143.5	160.1	284.1	142.7	112.2	165.9	199.7	625.3	662.7	399.4	578.1	577.2	659	491.4	585.8	491.5	390.5
C1orf56	19.7	32.2	48.4	26.8	44.2	35.3	42.9	56.1	46.1	35.7	24.4	18.6	10.2	25.8	37	41.8	35.3	25.2	27.3	24.7
C1orf61	34.25	64.1	83.65	77.55	72.45	64.95	75.95	75.65	57.4	74.35	99.1	89.75	64	47.55	59.85	71.2	55.85	52.05	68.6	119.9
C1orf68	11.55	26.95	20.25	42.6	11.4	14.15	13.45	24.1	9.35	19	17.35	25.1	13.9	10.9	10.95	12.9	11.65	10.2	16.15	24.6
C1orf95	147.6	131.1	120	67.4	83.1	155.5	114.2	112.3	167	120.2	202.3	99.2	187.9	96.2	89.1	100	87.7	112.6	165	205.2
C2	251.5	271.4	242.8	264.1	133.2	132.1	235.4	75.7	357.2	270.7	525.5	584.9	513.6	470.5	427.1	475.8	602.3	827.3	483.5	397.6
C20orf195	2.5	4.1	8.9	2.4	13	7.5	9.1	11.3	7.3	2.8	3.3	17.7	21.4	33.1	27.5	3.8	3.2	25.7	20.5	4.9
C20orf27	31.5	34.4	25.1	42.9	33.3	20.55	51.6	53.75	56.2	67.4	34.1	50.7	34.9	35.1	34.8	41	63.4	34.8	32.85	33.05
C21orf2	23.7333	37.4333	30.7	50.2333	54.9	48.2	56.2667	50.8667	49.3	49.7667	46.8333	55.2333	50.4333	42.7	39.7667	29.2667	78.5333	52.5667	41.7667	64.9
C21orf33	221.5	233.65	262.55	244.65	135.6	142.5	181.2	226.5	190.65	278.55	252.95	306.65	304.25	285.6	241.05	289.5	213.65	240.1	389.1	299.05
C21orf59	152.8	152.3	166.7	174.6	196.8	220.8	182.6	160.2	197.6	165.8	121.2	110	194.7	118.7	125.9	122	98.8	141.1	166.1	158.2
C21orf62	19.1	30.1	38.9	3.4	15.4	6.2	15.4	58.4	15.4	35.3	40.2	32.6	5.2	24	35.9	44.6	16.7	6.5	50.8	56.2
C21orf91	29.7	63	43.8	41.4	90.5	69.6	92.1	68.2	53.4	85.3	41.4	50.9	35.9	52.8	52.9	63.4	33.6	29.7	46	80.4
C22orf24	82	103.6	107.5	101.5	148.8	279.4	171.4	163.2	153.3	120.8	118.5	86.4	121.1	77.7	81.5	85.5	189.3	151.2	131.1	172.7
C22orf31	18.6	18.1	10.3	12.3	16.6	27	10.8	33.7	10.7	40.3	10.2	21	32.4	6.1	38.7	8.6	44.3	7.1	30.7	61.8
C22orf46	12.1	47	38.9	13.9	15.6	12	20.6	21.8	24.2	17.3	45.6	9.9	31.9	14.7	47	20.7	20.5	15.1	14	19.2
C2CD2	130.9	124.4	108.8	71.5	203.3	117.4	95.4	211.8	135.7	152.3	172.9	138.9	211.6	189.4	98.9	105.4	80.5	77.1	151.3	155.5
C2CD2L	24.5	28.25	12.25	29.95	50.8	9.75	23.65	23.15	45.5	81.6	16.45	33.85	47.6	34.9	30.8	12.55	42.6	43.25	51.75	16.55
C2CD3	151.1	107.25	117.5	120.3	89	90.15	88.15	72.2	94.85	93.35	141.4	116.9	148.25	75.1	85.25	93.15	87.55	92.65	111.4	112.9
C2CD5	149.8	256.3	283.1	121.3	58.8	161	97.7	39.8	148.4	134.4	170	321.9	158.4	250.2	202.4	207.3	161.9	162.6	201.3	141.9
C2orf27A	12.1	52.2	35.6	41.7	33.7	37.3	40.5	61.6	52.8	38.6	27.4	40.2	73.4	11	21.7	29.9	18.2	11.7	43.8	64
C2orf42	133	107.1	131.2	95.5	76.8	99.4	103	31.2	71.4	93.5	179.7	136.4	181.8	125.5	139.1	128.7	105.1	84	153.2	150.7
C2orf43	86.7667	66.9333	97.1333	76.5333	66.3667	79.8	95.1333	57.4667	90.6667	107.833	92.3667	99.5667	56.4	81.7333	97.4333	82.1333	81.8	99.2	97.6333	133.567
C2orf44	40.6	18.7	57	22.3	14.8	35.4	10	8.8	47.5	28.5	56.5	43.8	49.3	39.5	44.7	53.6	16.7	36.4	26.9	62
C2orf47	152.7	127	115.5	122.6	102.9	127.9	83.6	108.7	142.8	187.8	114.6	141.8	188.3	150.1	253.2	173.9	134.6	96.9	147.4	156.5
C2orf49	62.4	50.7	68.5	19.8	50.4	54.2	52.4	35.1	70	41.8	42.8	56.4	66.8	26.3	59.5	69.9	41.3	20.2	13.3	44.5
C2orf54	38.4	27	15.2	30.9	53	47.5	55.9	47.9	23.2	58.3	46.3	17.4	29.2	44.9	26.6	23.9	34.3	29.6	34.7	54.1
C2orf68	30.4	42.95	67.35	39.8	39.4	40.85	6.2	16.65	55.7	10.3	53.3	63.75	64.25	60.7	72.25	49.45	42.9	37.05	56.65	58.1
C2orf72	20.05	17.15	12.5	17.9	6.6	7.5	12.5	19.65	10.5	26.15	32.6	8.65	5.15	14.55	10.1	15.4	14.5	6.35	10.75	36.65
C2orf83	2.4	11.8	17.1	25.4	6.3	35.1	6.3	7	18.9	7.4	23.3	20.5	1.9	22.4	26.9	10.4	9.9	7.8	5.1	17
C3	1339.6	519.6	2029.3	1283.9	1142.3	1251.2	1574.2	1648.5	860.1	1548.2	790.3	580	457.3	850	624	712	874	738.2	857.2	891.1
C3AR1	1973.4	1775.8	462.6	311.3	293.9	523.8	209.1	154.6	486.6	555.7	297.6	1015.4	1100.4	603.1	1359.8	1160.8	802.6	1159	573.7	445.1
C3orf14	146	180.1	178.3	220.2	110.5	171.1	211.3	102.7	119.1	159.7	193.4	159.6	217.7	212.2	162.2	245.8	115.2	153.8	151.1	131.1
C3orf18	27.6	45.7	28.3	44	19.2	33.4	40.3	10.4	31.9	23.5	67.5	28.1	18.9	50.8	50	64.2	59.4	46.9	56.4	25.5
C3orf27	4.4	4.8	5.5	4.4	2.8	3.6	3.2	6.5	2.9	6.1	5.3	3.6	4.4	4.7	7	5.2	4.3	2.8	4.2	6
C3orf36	2	5.1	15.1	5.7	1.8	2.6	8.2	3.4	1.9	9.2	14.4	26.3	4.7	35.4	24.6	16.1	3.3	9.8	10.3	16.9
C3orf52	6.6	2.4	15.8	26.3	13.3	5.7	6.6	54.5	1.5	16	6.3	30.6	2.6	5.2	4.7	1.9	3.4	2.7	12.2	18.5
C4BPA	8	41	62.5	69.6	42.2	56.2	96.4	76.9	29.8	85.9	95.1	51.3	22.4	74	54.1	50.4	48.9	30.9	79.5	79.5
C4BPB	10.5	7.2	9.4	5.6	3.4	3.3	6.2	8.7	2	14.3	5.1	10.1	10.5	2.4	9.4	4.3	3.8	1.8	8.6	14
C4orf19	19.6	33.5	31.2	32.8	45.2	48.4	46.8	58.7	37.1	36	52	30.1	24.8	18.5	37.5	49.1	57.5	43.2	37.4	61.5
C4orf27	283.9	154.3	160.8	287.6	180.7	258.6	179.6	177.9	233.1	199.6	336.7	233.6	352	298.7	254.8	355.4	229.8	206.8	261.1	178.8
C4orf29	10.2	46.8	22.9	26.4	53.4	36.9	52.4	17.8	37.7	83.9	52.4	29.6	40.8	37.4	37.3	37.8	42.4	30.7	36.8	87.6
C4orf6	37.5	44.2	24.3	29.7	30.1	15.1	15.9	29.8	15.8	44.8	35.4	12.6	27.6	26.2	18	30.1	33.1	31.4	30.5	51.8
C5	25	50.2	94.2	42.9	9.2	55.5	31.8	69.4	50.5	50	71.5	62.6	32.9	23.4	51	37.2	66.4	42.5	64.2	101.6
C5AR1	403.3	409.2	303.1	855.4	199.9	286	186.9	194.9	502.2	193.5	211.7	226.7	142.9	125.7	163.3	279.7	356.3	465.7	159.6	282.3
C5AR2	19.1	34.2	7.1	44.5	6.8	6.9	8	10.6	7.6	10.4	9.7	6.4	27.7	12.3	6.2	25.1	9	5.9	1.7	9
C5orf15	776.3	425.9	371.4	535.9	457.8	628.4	381.4	475.7	514.3	466.7	628.4	587	683.3	670	579.5	589.6	606.7	633.6	653.9	580.9
C5orf22	198.8	136.3	94.2	129	133.7	184.3	110.8	106	149.2	114.2	142.3	142.1	151.3	112.9	122.3	123.2	159.2	141.1	136.6	93
C5orf28	47.3	31	39.6	64.7	59.1	79	62.2	46.5	67.4	51.5	42.9	44.4	57.4	33.2	53.6	51.1	59.5	38.5	43.7	34.6
C5orf30	68.9	43.5	54.5	47	36.3	41.1	5.2	51.3	31.1	60.8	53.1	44.8	50.3	68.9	71	64.5	43.1	43.1	88.8	114.1
C5orf42	7.3	32.3	4.8	5.3	6.6	8.8	6.1	4.8	21.3	8.8	33.6	4.7	48.3	2.5	5.1	33.5	8.9	5.8	18	18.2
C5orf45	81.9	50	85.5	55.3	9.6	7.8	11.3	16.6	15.5	20.3	66.6	86	104.6	64.7	72	40	64.9	11	50.4	72.3
C5orf66	81.5	94.4	87.5	79.6	101.7	120.6	136.9	172.2	66.4	129.7	166.2	113.9	118.9	79.2	100.7	126	100.4	75	98.4	159.3
C6	254.9	180	371.2	342.9	275	367.9	147.2	135.1	144.6	324.3	81.5	124.9	171.2	184.3	229	234.8	154.9	123.9	117.1	201
C6orf10	2.3	3.6	15	7.5	3.5	3.5	4.1	18.4	2.8	28	5.7	6.9	2.7	19.5	11	4.4	3.9	6.2	3.5	13.3
C6orf106	109.7	98.1	78.3333	60.1333	70.4667	28.6333	37.1667	56.6	63.7	76.3667	62.0667	85.1	140.767	52.4	67.1	116.433	61.7667	46.9333	62.5	88.7667
C6orf120	99.1	93.2	123.1	130.65	123.2	139.65	92.3	56.15	118.15	91.1	113.7	154.7	135.05	134	154.35	123.85	151	139.1	133.6	123.15
C6orf123	19.7	8	28.8	45.2	14	6.6	14.5	58.9	13.4	55.3	35.4	7.7	26.8	7.7	41.1	11.5	65.1	26.2	45.4	65.5
C6orf15	13.3	13.8	17.2	13.8	16.8	16	25.4	25.3	13.7	20.5	10	15.6	5.3	6.5	11.9	18.4	7.4	8.4	19	28
C6orf211	178.3	94	72.3	59	40.6	112.1	49.9	24.6	90.5	56.1	92.7	132.6	136.3	93.5	164.5	96.2	117.1	168.6	129.7	71.6
C6orf25	28.9	25	2.9	19.3	18.7	12.4	15.7	8.7	18	32.9	10.2	31.6	31.7	27.7	15.1	23.7	34.6	25.9	29	44.3
C6orf47	56	63.6	126.6	132.4	76.9	149.8	125	158.5	102.1	109	72.7	130.4	85.5	81.4	119.9	90.5	133.1	90.3	86.2	184
C6orf48	2229.2	1245	1062.7	714.4	687.4	441.9	829	548.1	597.4	585.1	1088.9	896.3	1837.4	1132.2	865.3	1754	842.9	695.1	767.2	760.5
C6orf62	226.267	212.867	167.667	206.133	184	275.2	110.567	109	190.8	121.867	238.9	199.667	241.1	180.667	220.4	180.133	193.033	191.467	175.933	214.5
C7	835.7	306.7	797.9	1114.6	298.1	1256.6	448	774.1	621.6	338.7	139.6	709.1	642.3	290.9	1387.3	148.7	789.7	796.2	847.9	447.9
C7orf26	81.3333	93.9667	74.1	85.0667	138.1	57.1333	74.4667	79.5333	110.233	87.5667	80.1333	89	90.7	83.8333	87.6	68.7333	134.967	101.5	98.7333	62.5
C7orf43	5.7	20	8.9	48.6	39.4	43.3	23.9	59.2	56.6	15.5	25.8	21.1	10.3	16.9	21.9	20	91.6	44.1	31.6	55.2
C7orf49	351.3	202.3	193.4	233.7	182.7	169.2	211.2	147.3	227.1	231.6	203.7	163.4	311.5	191.8	205.4	163.1	220.3	255.9	204.5	215
C7orf63	23.4	35.2	48	48.6	153.1	20.5	209.8	92.2	19.2	9.1	18.4	28.7	14.2	42.4	73.4	16.2	56.6	15.1	34.6	21.7
C7orf69	4.3	3.3	4.7	8.7	5.6	6.5	5.4	14.1	6	3.8	6.9	4.2	4.6	3.2	3.2	4.1	5.5	7.8	2.8	11
C8A	6.2	8.7	4.3	11.8	6.7	8	3.6	11.8	6	13.4	13.3	7.7	5.9	19	5.6	11.6	7.4	5.5	7.8	10.4
C8B	32.8	62.5	83.8	69.2	17.3	24.7	24.5	26	45.6	60.9	71.2	25.3	43.7	34	40.8	43.3	24.4	41.6	65.3	69.9
C8G	3.7	3.6	2.2	4.4	1.7	1.6	2	3.6	1.4	5.6	2.8	1.8	1.9	2.4	1.8	3.7	3	2	1.2	2.6
C8orf17	19.5	34.4	47.8	30.2	23.4	4.6	22.9	9.2	18	32.9	21.6	28.1	28.6	28.5	16.5	32.4	32.8	16	27.3	28.5
C8orf33	175.5	140.2	165.3	139.1	206.7	96.2	104.8	111.3	94.5	157.2	149.8	124.4	133.5	164.2	162.4	252.4	144.3	116.3	142.5	221.4
C8orf4	58.6	30.7	44.3	58.9	112.2	140.3	196.7	84.7	38.6	33	55.6	27.8	29.7	20.6	20.4	5	14.9	15.1	44	25.1
C8orf44	22.8	31.4	28.3	16	4.7	5.4	2.5	16.2	14.2	26.9	37.3	36.9	20.1	20.9	25.3	19.6	16.7	14.3	40.1	47.6
C8orf60	103.1	99.2	132.9	191.3	131.8	127.2	159	182.2	177.7	209.4	184.7	135.5	121.1	114.4	86.2	105.6	152	137.2	137.1	178.4
C9	9	1.1	2.2	2.1	1.3	3.1	3.4	4.2	4.8	19.3	9.9	10.5	1.3	2	11	6.5	5.4	2.8	9.9	11.5
C9orf114	56.8	65.9	38.6	39.4	31.7	31.8	58.8	49.6	49.2	64	92.4	66.9	70.9	52	36.7	37.3	45.9	13.7	37.6	62.6
C9orf116	15.45	17.8	23.75	20	18.15	16.05	24.25	31.55	23.05	20.15	44.4	11.35	19.2	21.15	22.1	34.35	25.1	26	20.3	30.85
C9orf156	46.9667	51.9	45.0333	47.5	40.5	54.6	29.6333	36.7667	45.5333	52.5333	55.5	53.5667	71.6333	38.3333	31.7333	50.9	48.1667	44	54.5333	57.1
C9orf16	95.75	127.7	109.15	139.4	169.35	112.85	195.375	214.775	181.875	206.725	195.65	147.95	215.925	141.325	142.9	140.4	304.5	261.4	237.325	200.15
C9orf3	190.6	137.4	203.7	104.3	157.7	266.1	85	224.3	182.9	130.6	222.4	159.1	226.7	301.8	163.5	202.7	229.9	164	185.9	221.6
C9orf38	27.4	24	17.8	16.5	31.3	27.9	7.1	41.4	18.8	34.5	57.4	39.9	13.9	18.9	18.2	32.2	25.5	5.3	23.8	43.2
C9orf40	30.8	23	28.4	23.4	16.3	27.4	35.5	7.1	23.6	26.2	19.1	31.8	23.7	25.6	28.7	28	28	27.4	24.8	25.1
C9orf53	11	7.5	8.8	4	3	6.5	3.8	6.1	2.4	6	4.7	4.8	5.2	11.1	29	3.5	5.8	4.3	3	17.6
C9orf78	142.1	145.3	98.3	162	200.2	186.3	162.2	85.8	131	132.9	128.2	118.2	126.8	76.6	139.1	126.3	103.6	182.3	107.2	123.8
C9orf9	40.5	45.6	89.6	68.1	63.6	85.6	93.9	114	93.7	75.9	85.1	41	79.5	69.5	76	54.9	56.3	57.7	63.3	94.1
C9orf91	74	52.9	50.2	64	49.6	64.9	65.1	57.1	47.7	77.3	68.1	59	66.9	39.2	54	38.6	53.6	58.8	65.5	79.7
CA1	35.2	42.6	39.4	49.7	72	56	71.25	68.4	67.4	109.45	62.15	59.95	50.75	44.6	55.25	52.4	54.25	57.4	63.55	99.15
CA10	4.2	11.3	4.8	2.5	3	3.3	3.3	2.1	1.8	14.9	8.7	15.6	1.9	3.6	0.8	2.8	3.1	1.9	3	4
CA11	53	104.3	76.2	33.5	72.2	56.2	61.4	84.9	104.4	106	79.6	69.6	70.9	85.9	66.3	87.7	80.6	68.3	107.6	105.2
CA12	125.433	113.083	102.233	185.55	229.6	96.4833	564.817	318.35	158.033	210.333	98.9833	107.65	100.533	148.983	92.3	129.633	128.783	149.483	110.617	132.433
CA14	55.1	77.6	111.3	101.2	115.3	61.3	140.5	144.2	52.6	131.6	67.6	78.2	97.8	88.3	58.1	100.4	80.6	101.1	116.7	147.6
CA2	33.5	6.5	37.5	22.4	3.8	7.6	25.1	3.9	3.5	14.2	34.7	50.6	6.6	38.3	15.5	36.5	39.3	64.1	19.6	4.4
CA3	6.7	1.2	12.9	13	0.6	0.5	9.4	7.4	1.7	4.5	0.6	5.3	4.9	17.5	1.4	15.5	14.3	5.4	1.4	10.1
CA4	26.65	32.85	45.65	46.65	43.85	30.8	37.5	37.5	41.6	64.8	41.25	29.65	28.35	25.05	26.3	26.7	41.4	31.4	38.15	49.7
CA5A	33.9	38.6	11.8	13.4	34.3	9	43.2	13.5	29	18.1	45.3	54.1	26.9	36.2	5.8	18.9	29.5	36.9	30.8	59.1
CA5B	27.5	32.2	35.8	16.8	9.45	17.55	10.15	17.25	7.85	28.55	35.65	37.15	38.3	71.95	20.55	62.8	10.6	9.3	25.3	47.85
CA5BP1	6.8	27	5.7	63.1	6.3	6.6	8.1	22.6	7	20.8	22.5	9.1	8.4	12.3	54.6	68.3	8.8	8.9	10.4	15.4
CA6	8	20.3	13.2	26.9	16.1	17.3	11	20.9	15.4	16.9	17.7	24.8	43.2	30.2	10.1	14.9	16	17.9	16	100.6
CA7	82.9	84.8	113.6	49.5	41.4	100.6	152.7	135.9	94.5	139.1	89.6	171.3	95.3	71.1	100	93.7	100.7	101.8	118.2	171.2
CA8	4.5	7.2	24.5	9.2	22.5	4	48	39.2	5.7	54.6	27.7	5.6	14.8	12.8	20.6	22.3	8.6	3.7	19.6	42.5
CA9	28.8	43.7	27.9	22.1	59.3	47.5	64.3	53.2	35.1	61	35.5	34.9	37.3	14.5	42.6	42.1	27.9	33.6	36.8	82.1
CAAP1	137.8	101.1	76.2	91.6	150.3	115.4	97.6	63.1	127.3	102.4	85.8	120.7	177.6	91.9	92.2	121.3	123.3	152.7	128.5	94.8
CAB39	700.7	649.3	772.7	598.6	386.5	424.9	210.1	176.5	383.2	360.9	415.6	566.6	556.4	584.9	742.2	681.8	541.8	508	454.6	298.5
CAB39L	48.5	43.9	58	9	4.5	6.5	5.6	5.3	7.8	4	5.3	27.7	40.5	31.3	26.6	63.1	12.1	4	4.4	5.3
CABIN1	44.95	122.1	132.25	138	168.1	113.75	175.45	216.4	196.4	194.15	193.3	139.3	114.7	141.25	92.5	126.3	225.6	190.75	196.65	154.1
CABP1	5.06667	4.5	10.0667	6.93333	3.26667	2.73333	4.83333	10.9333	5.06667	5.86667	6.7	4.2	7.86667	5.1	7.3	6.56667	5.43333	4.6	4.93333	4.53333
CABP2	2.5	10.8	2.6	3.7	4.1	2.3	7.2	4.5	3.3	4.3	4.3	3.9	17.6	5	1.6	6.8	4.6	2.4	2.1	4.2
CABP5	8.6	9.9	16.5	8.2	17.1	8.1	20.2	12	6.5	22.6	12.7	6.3	11.5	14.1	10.6	12.8	10.1	7.9	15.1	24.7
CABYR	58.5	44.4	81.3	56.6	54.8	62.4	45.2	94.2	34.8	77.2	89.1	52.6	48.8	47.4	36.8	79.9	48.2	49.8	47.4	84.9
CACFD1	96.4	71.8	112.6	151.2	128.4	106.3	69.05	124.6	91.5	113.35	175.75	133.5	120.5	109.25	130.25	49.75	164.6	126.05	138.2	137.35
CACNA1B	3.2	4.1	4.8	3.6	2.3	1.9	2.9	3.6	2.2	4.7	4.6	3.2	3.9	3.8	3.2	3.5	3.8	1.9	3.1	5.1
CACNA1C	28.05	6.75	5.15	8.7	18.1	14.2	14.2	12.25	13.6	14.05	26.2	8.7	6.35	15.3	16.8	13.3	8.6	20.65	19.5	18.35
CACNA1D	19.75	34.8	21.1	22.65	15.95	12.65	27.1	29.75	21.45	24.6	53.45	24.45	44.85	38.4	45.5	41.95	13.4	25	28.25	42.4
CACNA1E	14.3	27	5.5	8.1	4.9	6	7.7	7.7	7.9	6.1	12.3	8.3	4.5	26.1	3.9	9.4	5.6	4.9	7.3	7.3
CACNA1F	9.2	10.4	12.1	10.4	13	10.6	39.9	13.5	11.5	17.7	14.6	11.5	15.6	14	36.7	8.4	12.9	9.9	9.8	15.1
CACNA1G	5.84	6	12.88	16.02	16.12	13.58	10.78	14.22	14.66	10.56	12.34	13.6	6.84	13.74	13.9	7.38	15.86	13.86	16.02	16.58
CACNA1H	8.6	7.4	10.9	9.5	12.1	7.6	16.9	18.5	13.2	13.2	11.3	8.4	7.7	8.8	9.2	9.4	13.2	11.8	12.2	14
CACNA1I	41.4667	37.0667	23.2333	39	44.1667	42.8667	51	33.4667	29.4667	46.6667	42.3	36	44.9667	41.3	34.1	44.0333	33.1	37.5667	52	37.5333
CACNA1S	42	23.6	56	47.1	81.5	35.6	42	33.3	54.8	57.3	48.1	5.3	32.8	40.9	10.5	51.7	71.8	48.5	34.7	43
CACNA2D1	39	9.3	11.6	39.2	29.8	24.2	50.9	55.8	20.4	37.2	58.4	55.5	37.9	68.5	88	47.4	23.8	33.1	60.6	73.9
CACNA2D2	1.8	13.8	64.2	2.9	43.3	31.2	31	52.2	23.6	45.4	66.1	48.8	33.2	3	40.7	40.1	28.6	35.2	46.3	65.8
CACNA2D3	20	3	4.9	16.7	4.4	6.7	5	3.2	2.5	9.6	11.6	9.5	35.8	7.1	12.9	8.3	10.8	5.8	23.4	13.8
CACNB1	35.5333	33.0667	91.1333	62.6667	48.3667	47.5	53.7667	72.0333	52.2667	60.1667	63.5	63.0667	57.3	43.6667	53.1667	50.4667	52.3333	56.7	63.2	68.0667
CACNB2	34.1333	26.6667	37.8333	21.4	14.3	22.4	14.1667	22.4	13.6667	37.4	33.8667	28.1	32.5667	20.0667	36.2667	10.8667	20.1	26	21.1667	33.9667
CACNB3	30.05	65.1	67.95	72.4	50.65	24.7	56.25	39.15	68	89.05	75.95	37.5	41.6	81.5	43.55	85.85	30.5	21.85	75.2	79.55
CACNB4	32.9	6.6	27.4	9.3	5.4	9.4	16.1	10.7	8.3	14.7	12.8	16.2	5.1	37.1	27.2	21.8	5.8	6	6.4	31.4
CACNG1	4.1	9.8	3	13.3	4.8	3.4	12.9	6.5	5.2	17	4.2	5.2	10.4	5.8	5.4	8.2	8	4.8	5.9	15.8
CACNG2	9.6	2.8	13.1	4.4	18.9	10.2	13	14.6	20.6	15.9	16.4	30.4	34.9	18.2	26.6	15.4	11.7	12.1	25.3	23
CACNG3	5.4	4.7	5.8	7.5	5.4	9.8	6.3	12.5	6.6	6.1	14.5	4.6	7.2	8.6	9.8	7.6	7.7	4.7	5.6	5.8
CACNG4	89.85	54.45	188.3	58.95	183.5	131.55	211.45	243.3	134.95	187.95	63.95	173.4	155.4	120.5	162.4	141.65	171.35	180.15	162.2	95.4
CACNG5	9.3	6	7.7	51.3	5.8	5.7	4.2	8.1	6.1	11.2	29.1	13.7	6.9	52.2	17.6	9.3	4.6	4.7	6.5	9.2
CACTIN	59.1667	110.167	84.1	130	142.433	77.6	140.1	112.033	118.267	125.2	116	73.8667	101.1	72.2667	71.7667	84.8	100.5	100.133	100.1	99.6667
CACYBP	204.4	139.15	139.875	145.8	109.95	184.15	141.625	123.3	138.275	183.575	178.725	167	257.375	175.55	160.8	181.175	151.5	208.125	175.6	170.7
CAD	37.3	70.3	104.5	93.9	90.9	45.1	134.8	102.5	80.5	103.6	115.8	84.2	86	100.2	87.1	94.6	123.8	85	81.7	85.7
CADM1	67.2667	72.1333	93.1333	67.2333	125.2	79.7	155.133	179.533	88.4667	171.433	361.167	175.6	65.0333	265.867	201.667	212.633	180.967	128.767	134.833	111.8
CADM3	36.9	45.325	61.1	49.225	56.375	49.5	73.225	46.75	51.525	63.775	50.75	23.325	30.025	70.25	27.775	72.875	74.575	39.8	74.95	95.575
CADM3-AS1	3.8	3.7	7.6	6.7	5	6.8	7.7	8.4	5.5	8.3	8	5.9	9.4	12.6	6.3	7	7.4	8.3	4.2	6.9
CADM4	11.8	3.35	12.175	9	4.875	8.2	4.95	12.625	8.45	9.9	8.825	3.875	5.125	2.5	6.5	8.8	4.95	3.525	4.8	8.525
CADPS	17.3	35.2	10.6	25.3	32.9	48.8	32.3	23.6	14.2	39.9	25.7	19.8	17.2	1.9	25.8	20.6	32.5	32.1	42.2	48.7
CADPS2	215.4	177.5	201.3	150.5	188.8	231.6	193	177.6	236.2	198.2	282.8	184.3	208.4	186.1	176.9	158.4	193.6	194	194.8	205.8
CALB1	14.35	22	15.9	11.8	15.6	7.7	17.75	9.7	11.05	22.85	31.25	17.75	28.45	22.35	12.05	16.45	6.1	17.2	15.35	21.5
CALB2	19.4	17.6	25	49.1	83.6	83.6	58.3	139.5	58.9	114.9	72.1	46.4	84	84.2	47.7	132.1	121.2	52.2	78.3	91.3
CALCA	13.675	12.1	15.325	28.775	19.9	20.575	12.775	54.125	9.3	29.825	37.625	10	12.225	18.45	14.875	16.95	27.7	13.025	13.175	28.55
CALCB	6.6	16.6	4.6	4.2	5.9	21.9	4.7	18.8	2.3	29.6	35.9	25.1	33.3	27.7	28.4	32.8	3.8	7.8	26.9	31.2
CALCOCO1	269	623.7	543.5	319.6	538	347.6	341.9	453.5	622.3	397.7	325.2	353.1	248	277.5	417.6	347.3	528.7	498.6	362.4	463.6
CALCOCO2	354.6	885.9	819.9	624.5	774.3	1077.6	643.8	474.5	848.7	699.1	464.6	374.8	225.9	435.7	296	569.4	579.8	658.3	610.2	489.6
CALCR	15.25	32.55	27.85	16.5	18.8	40.8	32.65	26.8	22.1	33.5	54.55	22.65	34.1	22.8	22.3	32.5	32.65	24.15	36.65	51.55
CALCRL	180.7	594.35	351.6	195.9	188.25	301.1	189.15	46.35	258.9	328.8	173.45	188.15	42.8	231.45	136.25	251.05	188.3	67.3	252.85	204.55
CALD1	273.3	387.512	455.2	387.65	284.938	396.225	269.625	303.988	345.562	280.325	438.35	348.438	449.4	405.438	382.6	356.038	319	251.8	333.275	400.262
CALHM2	354.3	348.05	441.7	271.15	387.7	336.25	305.5	415.05	414.85	363.05	390.15	406.6	555.9	470.5	412.5	585.35	429.8	466.7	482.7	386.3
CALM1	200.5	137.9	251.9	125.7	96	236.5	172.7	170.9	197.8	166.6	154.8	131	183.7	253.2	464.2	304	157.6	103.6	149.9	230
CALML3	28	19.25	55.3	28.55	20.3	12.7	9.7	15.05	16.95	36.95	45.8	20.85	26.45	15.5	26.15	44.1	18.5	10.85	30.25	22.85
CALML4	23.55	11.45	21.15	19.05	15.8	39.55	11.95	9.9	31.1	15.65	54.45	82.25	176.7	73.25	81.7	106.45	43.9	101.45	77	58.85
CALML5	6.2	4.6	9.1	23.6	16.2	13.6	16.8	12.1	4.4	16.3	7.4	4.9	5.6	10.2	4.6	6.7	15.9	7.1	4.7	8.9
CALR	328.733	311.667	253.6	406.3	536.8	239.6	796.767	750.367	544.6	405.267	516.767	481.433	367	378.467	420.067	612.233	834.533	857.967	424.8	492.967
CALU	218.45	245.3	261.875	359.5	331.375	257.85	367.375	264.65	330.775	331.4	391.9	446.075	134.125	418.45	358.125	454.875	464.6	407.85	359.9	271.375
CALY	14.9	7.2	16.1	7.9	4.9	3.2	7	8.4	1.8	4.4	5	20.5	19	6.5	5.2	7.6	2.5	2.1	3.2	5
CAMK1	49.2	74.1	67	76.3	119.8	69.4	116.5	113.3	111.3	140.4	99.1	92.2	71.7	63.8	75.6	78	149.5	108.1	86	133.4
CAMK1D	14.3	54.1	71.2	47.4	35.3	17.9	32.8	54.8	11.9	15.3	73.5	63.1	52.2	24.2	20.4	21.3	4	52.2	43	71.9
CAMK1G	33.7	31.65	42.65	32.05	44.15	25.45	25.05	43.1	25.9	57.9	35.35	36.4	36.7	31.8	27.15	29.5	39.5	32.95	46	55.65
CAMK2A	13	5.4	23.6	14.9	30.8	21.05	15.65	42.25	6.8	23.65	21.7	14.3	19.4	14.65	21.4	30.6	25.5	30	30.2	21.5
CAMK2B	31.42	36.36	42.38	29.34	47.64	30.32	45.84	48.9	36.72	62.42	42.24	48.32	35.94	43.98	33.74	49.34	43.74	41.54	47.3	69.24
CAMK2G	87.8667	69.3	79.1333	75.7667	92	82.8667	72.9333	87.7333	82.4	126	132.433	123.9	108.733	103.267	79.9	100.9	101.633	102.5	110.133	124.5
CAMK2N1	100.2	274.7	261.6	263.9	376.7	346.7	267.8	301.7	366.9	196	294.4	77.2	59.8	331.8	114.5	328.9	104.6	84.1	149.3	162.1
CAMK4	6.7	18.5	27.5	41	17.8	19.6	5.5	22.7	19.1	49.3	52.6	4.1	32.5	28.5	7.2	33.1	40.9	19	26.9	63.9
CAMKK2	107.4	143.675	162.3	205.05	156.8	117.6	129.2	194.6	215.425	243.95	360.925	228.825	178.775	166.475	224.625	179.825	113.425	115.95	201.25	280.65
CAMKMT	50.5	38.6	87.9	54.3	8.8	38.5	28.6	45.6	43.1	78.3	43.8	42.7	54	23.3	32.7	45.8	25	54.8	61.7	52.7
CAMKV	70.8	40.2	80.6	88.2	32.2	61.7	63.2	144.5	80.2	106.8	99.8	60.2	36.7	99.4	71.6	80	88	85.9	67.3	197.4
CAMLG	519.5	489.2	631.1	394.7	513	874.8	294.6	519.7	569.6	426.3	592	329.3	563.9	448	351.1	395.3	298.7	286.5	347.2	372.3
CAMP	12.2	11.7	8.5	12.4	6.6	6.2	9.7	11.5	18.1	20	6.1	10.9	14.9	5.8	6.7	18.7	11.7	8	13.4	17.7
CAMSAP1	55.74	50.36	58.38	47.56	52.3	62.56	36.62	35.82	52.4	51.94	82.32	61.62	78.42	72.68	59.58	78.6	61.96	66.62	64.1	83.24
CAMSAP2	115.733	262.733	176.667	193.067	125.433	128.167	118.8	159.133	124.267	133.367	179.467	133.1	99.9667	191.2	129.333	235.667	146.033	98.7333	155.467	125.7
CAMTA1	14	4	7	2.5	4.8	4.5	5.4	2.9	3.4	17.6	4.1	3.8	2.5	3.7	5.5	5	3.6	7.2	3	4.2
CAMTA2	81.1	85.8	109.6	159.4	222.2	164.2	229.1	276.4	171.6	143.9	131	81.7	146.8	138.5	92.5	160.7	160.3	153.5	166.1	126.5
CAND1	123.667	122.733	116.767	95.3333	113.467	131.8	96.8667	87.7	94.4333	101.533	132.867	132.733	124.1	110.467	146.767	110.5	116.533	103.5	125.5	97.2667
CAND2	82	62.2	116.6	82.3	104.2	63.3	43.2	100.6	68.3	82.7	137.8	39.9	103.6	72.7	53.9	84.3	35.1	44.3	53.5	70
CANT1	107.8	158.25	122.8	198.7	129.5	121.65	117.45	124.45	129.45	133.75	126.95	153.4	120.05	136.85	104.8	95.15	126.3	145.35	181.8	128.6
CANX	1767.3	1033.83	1168.07	1090.23	698.5	818.733	1185.77	757.033	905.567	886.033	1233.83	1576.5	1081.43	1563.17	1478.33	1697.67	1483.33	1105.13	1282.23	1064.73
CAP1	523.65	978.35	797.3	886.9	778.15	1348.8	989.75	697.5	1213.2	1102.8	1087.2	1194.35	1027.65	870.05	933.7	1386.85	1340.5	1405.7	1267.6	1071.35
CAP2	25.65	53.6	68.55	46	61.55	69	57.6	89.8	62.65	112.45	75	41.65	50.4	93.85	38.2	53.7	42.8	49.55	62.75	69.1
CAPG	278.8	367.7	267.2	241.1	80.8	74.7	167.3	124.4	398	180.1	525.3	832.9	573.2	467.5	529.7	809.1	905	1011.4	326.7	278.1
CAPN1	104.8	77	109.3	114.8	149.5	86.4	120.5	187.5	159.8	127.4	122.3	121.7	132.3	127.2	96	119.7	165.8	89.7	142.2	147.7
CAPN10	19.35	31.3	51.5	35.05	14.4	9.3	15.65	25.3	37.6	10.55	42.15	22.75	22.75	23.35	12.7	41.25	9.5	13.35	9.35	17.1
CAPN11	26.7	18.4	46.5	8.5	10.7	9.8	4.1	15.6	26.1	16.5	10.9	23.8	10.7	10.3	11.1	6	15.3	13.3	22.6	18.4
CAPN15	36.9	56.4	75.9	82.3	175.6	40.7	123.6	86.7	94.3	90.8	30.6	54.6	86.6	13.5	33.7	48.4	104.2	93.8	61.2	86.3
CAPN2	504.05	924.6	1031.45	922.05	871.55	1213.35	841.55	1142.15	1096.4	950.55	1182.65	1093.2	1048.35	1431.55	1273.7	1704.25	1112.4	1038.4	1119.75	970.95
CAPN3	34	29.4667	31.6667	31.9	21.9667	21.7333	26.3	37	25.7333	30.2333	52.3667	33.0333	63.5	34.9333	29.3	29.0667	46.9667	30.1667	22.7667	35.0667
CAPN5	29.4	38.9	67.1	26.4	56.9	68.7	78.8	51.7	40.4	62.3	50.6	56.8	57.3	56.4	42.6	60.4	88.6	60.5	82.3	101.8
CAPN6	13	4.3	11.0667	19.3667	4.7	4.6	3.73333	5.5	3.46667	7.5	13.3333	6.53333	3.53333	10.0333	5.5	10.8667	4.4	6.03333	8.4	8.53333
CAPN7	103.85	147.9	171.9	68.95	104.6	123.9	82.05	37.95	110.85	110.05	106.2	138	111.65	129.25	137.5	118.25	134.15	93.95	135.55	96.6
CAPN9	13.25	13.75	18.9	13.25	26.15	25.05	27.55	17.45	23.75	58.8	42.2	18.7	43.2	32	27.1	32.75	35.1	25.3	31.15	39.1
CAPNS1	1171.8	1234.2	1345.4	1644	1608.7	734.5	1647	2072.6	1799.6	1435	1308.1	1954	2198.9	1888.4	1798.3	2093.4	1884.5	2450.2	1596.9	1502.2
CAPRIN1	550.6	432.5	405.55	458.85	359.35	298.35	575.3	256.05	263.7	275.6	301.6	714.7	535	686.95	663.3	563.85	556.6	510.7	472.7	352.9
CAPRIN2	156.8	138.6	197.6	146.4	135.6	184.5	103.4	143.6	176.5	127	242.4	154.9	128.4	188.3	165.6	169.3	160.6	191.8	202.3	144.7
CAPZA1	433.5	513.6	461.5	661.9	537.3	926.8	678.6	669.3	539.5	556.2	763.4	627.4	501.8	627.5	708.4	530.4	756.9	1007.7	680.3	542.6
CAPZA2	368.6	498.95	299.7	363.9	331.7	459.5	311.6	294.75	448.2	472.4	455.05	530.2	389.25	419.85	470.4	593.85	525.3	575.15	475.2	376.6
CAPZB	423.7	430.325	328.925	531.125	604.8	387.775	601.1	553.375	573.525	573.4	846.55	737.45	838.825	630.6	635.825	607.25	852.7	974.275	865.45	863.85
CARD10	33.1667	27.0333	37.8	33.5667	67	37.5333	29.7	47	31.5333	53.7333	75.8333	21.9333	42.5667	43.3333	20	30.9	36.0333	15.8333	43.2333	47.9667
CARD14	21.05	31.85	20.15	18.2	39.35	35.85	25	19.65	26.9	26.2	13.7	43.9	50.45	7.85	20.8	8.2	40.7	42.85	30.9	42.9
CARD8	113.7	45.4	110.9	74	65.9	49.2	54.8	82.3	117	135.8	156.9	99	89.3	96.9	138.4	67.8	47.5	101.7	99.6	87.6
CARF	26.1	24	24.6	11.2	17.3	22.6	25.8	25.1	24.8	28.2	26.5	37.9	16.2	22.6	50.5	22.5	28.7	35.7	30.4	24.4
CARHSP1	59.6	101.8	107.6	55.8	61.3	95	157.8	95.3	137.4	40.8	42.8	110.6	94.9	125.1	111.1	98.3	72.6	74.2	95.3	119.2
CARKD	230.4	243.9	362.6	339.7	270.9	214.7	283.2	208.1	295.3	340	250.8	274.1	249.4	199.5	258.9	232.5	353.4	305.7	367.2	320.4
CARM1	76.5	85.1	94.6	141.6	105.8	107.8	149.2	173.1	161.9	130	134.3	102.5	68	94.7	92	92.9	98.8	128.3	101.7	83.7
CARS	615.85	463.45	289.75	564.25	609.6	615.45	807.55	612.3	516.15	610.15	419.5	383.95	529.45	360.5	313.4	365.4	414.35	394.35	408.15	359.1
CARS2	134.3	154.5	133.8	128.3	71.5	78.3	108.2	152.7	149.4	77.9	152.8	100.6	123.8	162.4	137.2	199.9	140.9	113.4	104.6	123.9
CARTPT	43.5	28.7	59	43.5	2.3	1.7	3	13.9	3.5	34.5	10.1	33.6	41.9	43.9	60.1	30	5.8	17.5	28.9	56.7
CASC1	14.8	14.8	1.4	2.3	10.8	6.5	2	2.1	2.2	14.8	9.8	6.8	5.9	7.4	12.6	10.4	1.3	1.7	6	24.2
CASC5	8.3	3.2	12.9	7.7	1.3	1.3	2.5	8.3	0.6	3.2	5	1.2	11.4	5.6	2.9	13.8	1.1	0.5	8	6.8
CASD1	53.8	108.2	84.8	91.1	95.9	92.7	47	74.9	69.7	115.7	90.8	103.8	118.1	89.3	94.2	63.3	53.2	97.4	101.2	110.6
CASK	143	106.05	190.3	127.45	106.35	113.65	71.4	92.25	87.3	132.25	112.3	87.2	84.95	130.25	154.35	119.7	94.15	117.4	106.95	118.9
CASKIN2	18.4	19.7	56.35	61.45	105.55	71.3	72.3	163.1	75.8	54.15	63.7	11.95	23.45	51.75	46.6	26.95	22.85	35.2	58.1	20.25
CASP1	204.72	98.96	142.44	82.84	84.88	77.86	132.56	98.14	97.48	112.38	190	248.32	95.66	209.28	293.24	256.8	190.2	186.1	235.44	207.14
CASP10	46.4	44.6	38.4	28.3	25.575	28.075	40.3	30.075	21.6	49.175	48.975	34.925	43.975	55.9	48.25	60.025	18.6	33.325	58.6	86.1
CASP2	32.82	24.86	29.9	29.72	35.88	25.12	23.76	28.98	22.74	50.7	39.62	26.74	26.16	22.8	16.42	29.9	22.48	18.36	35.1	55.94
CASP3	166	68.8	69.3	134.6	118.8	99.9	77.6	158.1	69.9	75.7	103	125.6	269.9	150.9	137.4	138.2	137.8	90.5	103.6	110.5
CASP4	152.95	83.2	94.35	93.9	140.7	159	135.85	99.05	76.55	88.8	102.75	76.85	58.9	105.05	110.75	93.2	113.7	98.45	73.35	77.3
CASP5	15.4	23	7.7	3	32.2	29.8	31.6	78.9	22.5	28.3	11.3	40.9	4.4	19.5	17	25.4	12.2	22.4	27.1	14.5
CASP6	86.3	56.2	50.85	47.7	31.4	59.1	6.75	16.4	53.8	34.6	84.8	81.1	143.05	102.7	59.75	55.9	50.8	46.45	51.25	65.7
CASP7	299	178.8	176.6	242.8	225.6	434	197.3	214.1	214.9	143.6	202.2	169	245.7	190.2	242.3	158.6	220	164.8	212.3	139
CASP8	78.55	46.65	89.7	58.3	48.05	87	54.75	40.55	64.65	76.65	67.6	121.8	261.95	76.3	107.05	67.2	91.55	68	101.45	95.5
CASP8AP2	93.7	84.7	87.7	58.6	69.2	147.7	43.6	17.3	97.3	87.2	85.7	98.7	71.9	98.1	83.4	102.3	66.4	111.4	121.8	106.6
CASP9	123.15	159.8	172.05	147.9	169.6	124.05	165.4	201.7	171.05	171.1	169.75	201	201.5	145.65	171.4	148.55	150.5	142.3	177.2	235.8
CASQ1	24.4	30.6	26.5	20.1	55.1	52	46.9	41.8	38	44.5	50.5	49.6	43.1	37.1	35.7	43.2	41.7	27.7	39.4	57.8
CASQ2	20.9	65	102.2	47.5	24.8	118.3	21.7	169.8	123.4	96.3	76.9	11.9	11.4	63.6	12.1	9.9	20.3	21.5	83.3	28.2
CASR	20.25	19.55	18.7	11.85	10.15	21.5	42.05	39.25	7.8	44.05	39.15	30.65	28.6	27.1	17.1	35.45	28.45	26.8	36.15	35.2
CASS4	1.7	9	5.3	4.9	5.6	5.3	2.6	4.9	4.9	8	9.4	19.2	5.8	9.2	16	7.6	3.2	3	4.7	7
CAST	411.15	419.75	522.875	461.775	533.325	810.125	427.025	488	484.35	437.325	426.15	377.475	359.475	486.675	446.25	562.675	397.25	344.075	372.675	431.45
CASZ1	107.8	93.1	131.6	111.9	50.6	80.8	97.1	47.4	74.2	76	134.2	86.1	108.5	76.2	111.1	110.7	66.8	92.6	120.3	118
CAT	406.367	341.6	456.6	190.233	206.967	635.267	217.433	260.533	488.7	338.633	210.5	560.333	594.1	390.067	562.033	459.3	415.7	403.9	534.3	431.633
CATR1	2.2	0.9	2.1	3.9	2.3	2.5	1.5	2.5	1.9	3.4	2.3	1.4	2.4	1.6	1.9	1.1	2.3	2.1	2.6	3.2
CATSPERB	25.7	36.7	37.5	26.2	26.2	22.4	24.5	26	19.7	52.2	20	24.2	23.7	23.9	9.1	25.4	46.4	29.3	25.3	41.1
CATSPERG	9.2	14	9.9	8.5	6.2	22.6	5.2	24.8	19	14.1	26.8	12.3	10.4	5.5	33.1	25.1	4.8	8.4	5.3	36.3
CAV1	884.25	1434.85	1629.6	1000.55	1420.45	2514.55	860.5	1699.75	1796.3	1206.9	1391.75	1402	2616.65	1904.8	1799.2	1586.95	1317.8	1684.9	1328	1498.4
CAV2	155.467	234.267	214.8	231.833	320.667	522.733	263	266.167	239.567	249.9	221.7	151.9	316.333	245.8	193.967	232.367	212.067	141.5	196.867	186.433
CAV3	41.5	57.9	18.6	22.4	63.4	107.8	105.7	129.9	38.6	67.5	77	84.1	80.7	79.4	45.9	43.6	60.7	72.5	66.6	91.9
CBFA2T2	22.4667	45.6	71.4333	57.8333	50.7667	56.2	24.2333	35.7667	49.8667	35.8	61.1	72.3	78.3333	36.9	51	39.3667	56.9	43.5667	87.4	57.8
CBFA2T3	35.5	35.8	80.8	54.5	50.5	56	45.8	77.7	53.4	61.3	48.4	52	76.2	47	54.3	78.4	87.5	44	49.4	92.6
CBFB	399.75	437	301.9	306	269.85	342.1	238.9	223.05	237.15	199.2	333	456.85	364.35	351.8	431.25	431.6	342.4	311.9	373.65	317.45
CBL	27.6	15.2	18	22.4	26.5	17	42.8	13.3	22.4	36.7	26.6	21.7	19.1	21.7	22.3	24.6	18	26.5	28.1	40.1
CBLB	185.85	498.1	996.1	226.05	263.9	354.45	378.5	519.95	452.75	272.55	211.95	122.75	83.95	116.75	211.6	103.2	84.55	97.7	111.2	128.45
CBLC	2.3	4.1	6.1	3.7	3	4	6	4.4	2.5	6	10.5	7.4	4.5	8.9	2.6	8.1	7.8	2.8	5.4	7.6
CBLL1	42.1	50.8	35.2	32.6	61.5	57.8	27.4	31.2	53.2	30.1	33.5	24.9	16.7	10.2	25.1	26.9	22.6	18.6	25.2	34.1
CBLN1	36.6	17.9	22.3	16.6	9.4	7.5	12.2	13.5	5.6	23.1	23.3	20.6	19.2	24.7	13.7	39.8	21.3	10.9	21.9	50.5
CBR1	54	39	27.9	51.8	25.6	26.5	4	4.3	53.7	60.6	83.5	124.6	136.7	118.9	101.8	129.5	139.4	93.8	116.4	24.9
CBR3	151.2	172.7	263.7	126.7	130.4	191.5	125.7	178.8	189	77.7	209.6	284.9	558.3	376.5	261.1	442	245.4	246.7	440.9	359.8
CBR4	118.4	61	136.6	160.7	64.6	109.5	61.7	64.8	100.5	136.3	125.8	120.1	152.5	100.3	128.6	118.5	98.8	114.8	179	169.7
CBS	69.3	110.3	131.2	128.4	84.3	114.4	102.3	109.3	129.9	134.2	115.3	72.1	72.3	55.3	51.6	52.1	88.3	96	87.7	115.7
CBX1	185.7	251.9	225	208.8	172	256	152.5	170.3	248.1	264.1	453.7	364.7	203.9	402.5	333.1	350.4	242	309.5	412.8	362
CBX2	26.6	13.9	6.9	17.6	6	7	11.6	14	3.9	7	7.2	23.8	21.2	13.4	6.7	19.1	3.1	5.6	9.2	10.1
CBX3	692.55	432.4	314.5	515.9	467.3	681.9	493.95	546.1	497.35	348.85	400.8	375.65	672.85	333.6	378.6	418.8	441.8	467.3	331.6	296.65
CBX4	66.7	33.6	50.1	80.5	22.6	43.9	44.5	40.5	101.8	58.8	18.3	37.4	69.7	61.6	60.6	44.6	86.2	66.3	58.5	91.2
CBX5	73.5	52.9	49.45	78.15	96.9	53.2	32.7	51.5	29.3	50.6	109.9	69.5	81.25	115.05	76.9	101.7	94.8	64.75	113	66.95
CBX6	91.05	147.35	141.6	279.75	204.2	97.4	103.55	165.15	182.1	130.65	326.6	419.5	315.75	302.15	253.4	307.95	253.35	261.25	417.3	345.45
CBX7	337.9	526.5	649.3	255.2	291.7	248.6	138.6	261.8	561.9	281.5	194	366.6	573.3	384.1	407.3	372.6	358.6	255.1	506.7	371.6
CBX8	9.5	35.6	12.8	5.8	9.6	14.8	10.6	18.4	5.3	11.8	11.7	8.5	5.5	8.5	6.6	6.9	10.2	13.8	7.6	13.8
CBY1	293.5	203.5	258.9	179.6	119	121	123.2	102	155.1	246.6	293.8	246.3	101	257.7	148.5	280.6	214.7	155	212.4	204.1
CC2D1A	31.7	31.925	38.55	40.45	36.65	14.95	39.55	49.725	38.9	46.8	51.55	19.775	30.35	43.325	20.65	37.175	31.4	30.3	25.475	32
CCAR2	2.1	1.6	5.6	3.5	1.5	1.4	1.8	3.1	1.9	2.8	2.7	1.7	2.9	4.8	5.7	4.5	2.6	1.5	2.6	4.2
CCBL1	78.6	90.1	174.7	114.2	103.3	117.2	136.1	100.5	118.3	131.1	140.9	95.6	104.7	124.8	123.2	142.4	153.7	122.6	130.8	151.9
CCBL2	190.7	230.2	233.4	223.6	134.9	306.1	155.5	117.8	164.3	176.5	182.3	200.1	267.9	210	242.6	268.4	238.3	174.8	218.7	230.3
CCDC101	182.5	175.55	115.25	118.75	78.25	52	57.95	91.9	86.3	107.25	126.15	110.8	191.25	110.15	112.15	114.9	78.25	58.85	102.05	118.4
CCDC102B	0.9	3	13.7	1.6	1.9	1.8	2.2	3.5	2.7	10.4	67.6	21.7	1.4	48.3	21.5	11.2	22.8	11	34.1	36.6
CCDC106	7.4	5.2	4.2	8	3.9	2.5	3.2	6	5	3.2	7.7	5.6	8.8	2.3	5.4	11.4	12.4	6.3	7.4	6.3
CCDC109B	319.5	248	189.5	164.9	306.2	250.4	303.9	285.2	251.7	278.4	274.2	313.8	351.5	268.2	190.8	308.8	343.6	282	276.9	268.7
CCDC121	9.5	18.8	41.3	16.3	2.9	12.1	6.1	1.2	14.9	18.2	6.4	15.2	25	33.6	11.4	23.3	11.4	12.1	12.7	31.5
CCDC130	99.6	142	140.5	128.7	158.4	92.6	103.3	122.1	112.7	81.9	70.2	71.2	147.1	74.4	104.3	49	135.7	101.4	90.8	129
CCDC132	25	12	12.9	11.3	9	9.2	15.5	9.9	6.9	18.9	15.3	3.7	15.4	10.2	8.8	10.2	9.2	7.1	15.2	70.9
CCDC134	2.3	9.3	5.2	4.1	2.5	2.3	3.2	11.8	2.2	8.2	4.8	10.6	7.3	14	4.1	4.6	3.1	2.5	2.4	10.1
CCDC144A	24.2	2	0.9	10.4	2.4	3.7	3.8	3.3	2.1	9.1	4.4	11	11.5	3.2	8	2.9	9.2	2.4	7.3	6.5
CCDC15	20	25.8	43.4	34.3	35.7	48.4	50.8	52	29.8	56.6	48.3	50.6	41.2	17.7	34.8	57.9	26.3	46.9	41	55
CCDC170	4.1	37.5	7.8	11.8	11	22.7	19.7	17.6	4.7	16.1	39.2	28.6	22.3	14.3	37	29.8	39.2	9.2	55.7	10.1
CCDC176	118.8	117.1	133.3	107.3	109	126.2	103.5	100.4	70.3	218	235.9	95.2	113.2	78.4	99.8	99.6	126.2	137.2	112.9	255.2
CCDC177	62.5	75.6	94.3	41.2	98.1	103.6	118.5	91.5	65.7	142.1	97.2	86.4	84.7	83.5	63.2	94.7	19.9	97.1	83.7	127.8
CCDC181	13.3	14.4	20.3	15.9	7.3	14.6	1.8	12.7	8.2	33.9	17.9	6.1	0.6	18.1	28.2	35.4	6.5	8.1	15.1	14.4
CCDC186	54.2	41	48.9	30.5	49.5	53.6	19.7	46.5	22	48.2	52.2	40.1	14.1	42.3	32.4	49.7	11.2	31.9	42.9	96.5
CCDC19	10.4	10.4	6.9	4.9	19.2	8.3	14.9	22.3	11.8	9.6	11.2	5.9	7.8	6.7	6.8	7.4	7.8	10.2	12.3	14.5
CCDC22	37	56.2	57.15	57.35	26.6	16.25	21.3	37.05	42.25	41.3	45.95	53.1	63.1	54.6	39.8	51	39.15	52.35	48.3	51
CCDC25	203.4	166.9	113.6	154.6	196.2	296.9	170.4	171.9	165.7	205.1	173	144	177.3	182.2	189.2	196.1	186.9	185	212.3	154.8
CCDC28A	239	294.4	388.6	212.5	297	393.3	206.3	189.9	301.7	301.6	240.7	332.6	277.8	237.3	270.1	417.2	274.6	292.5	428.4	280.3
CCDC28B	8.35	32	13.6	5.8	10.65	5.5	17.15	9.65	13.65	7.75	34.55	23.1	24.55	32.05	3.7	28.65	23.1	11.55	18.1	35.75
CCDC30	37.3	20.2	40.1	25.6	43.7	16.3	16.6	17.2	5.4	24.3	23.1	20.1	28.1	25.1	10.8	26.2	8.6	14.1	24.6	36.5
CCDC33	25.8	31.8	60.2	22.2	56.7	22.8	72.5	58.9	46.2	55.4	9.2	27.1	59.5	32.1	31.3	34.4	67	46.1	46.6	55.9
CCDC40	31.7	23.85	34.85	40.45	21.8	20.5	34.35	24.3	26.3	37.5	46.7	31	36.45	32.05	30.55	41.2	41	28.3	39.4	48.05
CCDC47	269	154.5	276.6	430.5	532.9	429.9	394.3	269.9	397.7	389.3	95.6	265.8	201.9	160.5	182.6	114.1	211	440.9	314.7	231
CCDC51	103	88.3	111.8	94.4	85	121.4	110.3	83	114.2	161.8	145	139.2	153.7	135.2	102.2	126.6	104.1	112.4	126.2	159.4
CCDC53	144.6	107.9	165.7	136.1	31.3	283.3	88.8	73.4	208.2	151.5	113.3	203	58.9	241.5	241.8	339	136.8	164.5	225.2	170.2
CCDC57	24.3	10	11.6	11.6	14	5.1	12.4	9.7	10.6	6.2	8.2	7.1	5.7	9.5	3.5	5.2	10.3	10.9	5.5	9.4
CCDC59	239.2	289.1	211.9	211.4	307.9	423.7	213.5	285.2	206.5	136.3	92.3	85.4	141.4	81.2	105	108	99.2	100.7	84.5	80
CCDC6	160.2	125.7	132.3	123.2	113.8	130.4	122	99.4	78.2	119.3	126.6	155	178.7	127.9	151.7	152.6	113.8	130.2	129.1	138.8
CCDC64	29	54.6	23.9	51.6	11.7	14.9	27.7	31.5	23.2	34.4	39.3	47.4	29.8	44.6	17.2	93.5	27.4	31.1	42.3	49.9
CCDC68	13.8	19.1	30.8	19	29.8	21.1	8.8	30.1	38.4	50.4	34.8	20.4	25.4	19.9	18.6	35.6	19.5	6.6	28	60.6
CCDC69	131.3	174.8	133.9	145.4	101	195.2	66.3	71.4	308.7	73.2	21.8	33.1	78	66.7	27.5	56.5	43.8	33.4	39.7	42
CCDC7	25.8	64.2	45.2	52.7	45.2	41.7	77.4	20.6	36.5	88	62.3	53.4	75.9	39	54.2	61.7	72.7	81.4	43.6	94.6
CCDC70	20	21.4	9.1	9	15.5	11.3	13.1	28.5	9.5	20.4	23.6	23.3	15.7	27.6	10.9	9.6	6.4	17.2	32.5	79.6
CCDC71	10.4	65.5	7.3	42.7	15.2	22.1	20.9	67.8	13.7	39.2	23.8	27.3	29.8	27.3	38.3	15.8	63.5	38.5	17.2	24.7
CCDC81	15.4	8.7	9.6	29.5	20.3	30.3	4.6	1.7	3.2	10.8	29.3	4.2	4.4	5.2	14.8	24.3	5.1	35.3	4.8	17.2
CCDC82	26.7	5.8	28.3	33	8.7	5.1	10.6	29	6.5	33.6	12.8	2	22.4	23.7	30.3	36.8	34.3	5.3	19.5	56.9
CCDC85B	37.6333	36.6333	40.7333	62.7667	84.5667	24.8333	122.7	86.7333	51.2	71.2333	69.9	56.4	57.6	57.5	26.0667	61.9	103.133	54.5333	98.4333	86.7333
CCDC85C	56.8	51.9	26.8	39.5	42.6	80.1	13.3	35.3	18.9	22.5	61.1	54.6	64.9	42.9	58.3	27.8	14.1	16	10.5	21.6
CCDC86	227	190.7	160.5	275.7	276.9	183.7	344.8	262.3	187.1	324	153.2	127.1	180.9	117.2	153.1	160.3	188.8	155.7	179	191.5
CCDC87	22.2	13.4	14.9	54.8	13.6	11.7	14.2	16.6	10.6	32.6	54.7	18	12.9	13.5	17.5	48.8	15.3	11.5	8	15.6
CCDC88A	41.2	33.3	34.25	33.6	21	26.2	17.5	9	24.7	26.05	38.75	78.45	60.1	37.5	52.55	71.8	26.65	51.55	46.45	36.45
CCDC88C	13.6	8.6	17.6	1.6	2.1	1.4	2.5	4	3.2	17.4	6.3	10.4	3.6	6.7	4.8	4.4	1.8	5.3	18.1	16.9
CCDC9	136.5	149.8	160.3	180.5	206.6	173.9	182.4	256.5	155.5	215.6	140.4	141.6	114.6	144.8	156.7	163.1	172	162.6	167.7	198.2
CCDC90B	365.1	289	326.4	228.8	208.2	407.7	182.3	221.6	281.7	312.8	215.8	331.4	510.3	367.9	344.2	352.9	268.7	362.1	390.8	309.3
CCDC91	77.6	143.3	77.7	103.9	36.5	155.9	71.3	86	125.8	109.8	70.4	101.5	133.4	93.2	86.7	110.3	112.8	120.2	131.4	107.1
CCDC92	157.9	208.7	287.5	309.8	308.9	193.8	248.9	339.2	346.3	441.5	337.4	225.9	339.3	342.2	236.2	345.1	295.3	273.2	271.4	267.9
CCDC93	51.9667	50.5667	71.4	39.6	66.4667	61.8	38.5	54.2667	47.2667	59.6333	74.8667	63.8	58.6667	68.9	60.7	67.9	86.5333	84.7333	72.1	75.6667
CCDC94	37.6	39.6	10.9	38.2	21.4	4.9	6.5	64.2	56.3	45.8	27.1	23.2	72.3	37.2	37.5	28.7	42.4	44.1	14.6	4.9
CCHCR1	22.875	23.4	41.95	45.325	31.775	19.025	27.675	53.975	32.875	33.25	52.4	38.45	35.25	41.6	31.1	26.175	41.675	28.85	32.95	25.025
CCIN	11.3	13.7	9.8	9.9	7.5	7.6	11.1	16.1	6.7	15.2	11.5	8	12.3	14.5	11	30.5	6.6	9.2	9.7	17.2
CCK	37.8	21.3	40.7	6.9	3.5	6.3	17.8	7.3	4.4	11.2	14.1	19.6	11.8	8.2	16.1	34.9	2	5.1	7.4	16.5
CCKAR	17.35	5.6	37.75	11.8	10.15	16	31.8	23.4	9.15	23.35	31.7	23.9	27.7	12.5	12.2	8.4	22.95	6.35	6.05	16
CCKBR	38.7	41	63.2	51.7	36.3	38.1	73.7	39.2	25.5	87.4	78.5	36.7	45.4	57.8	61	46.8	48	43.6	46.8	93.7
CCL1	4.7	2.4	3.4	5.8	3.4	3.5	4.7	7.5	3.7	7.1	4.4	2.3	3.8	4.1	3.3	3.9	5.5	3.9	4.7	5.1
CCL11	13.6	33.3	3.7	7.9	53.9	33	90.5	63	47.4	66.1	86.6	20.8	32.8	10.6	19.6	44.1	21.8	14.3	48.8	67.3
CCL13	74.5	53.45	25.85	64.65	43.35	77.15	136.1	89.7	60.1	144.65	36.5	39.1	35.85	85.05	19.3	64.85	48.05	42.1	27.25	51.4
CCL16	39.2	34.9	49	51.9	55.8	40.1	77.7	37	42.9	65.1	16	29.9	24.8	57.7	41.4	12.1	92.4	20	32.9	71.9
CCL17	34.7	3.9	12.5	4.7	6	2.2	4	12.6	4.4	6.1	6.1	3.3	9.2	2.9	3.9	8.7	4.9	5.3	4.6	6.2
CCL18	907.1	132	5.85	161.85	112.4	288.45	102.65	60.75	2503.95	66.8	368.2	233	174.55	184.3	73.2	141.2	791.2	1371.95	130.35	360.8
CCL19	30.5	20.1	12.3	40	36.6	33.6	409.1	215.5	49.2	252.2	30	89.7	130.4	108.8	77.8	68.6	286.8	165.8	230.9	450.1
CCL2	603.6	97.4	124	428.9	779.9	214.8	4173.2	2073	104.7	381.6	450.5	287.7	78	912.9	201.1	493.7	393.5	502.3	190.3	47
CCL20	4.9	154.5	4.5	388.7	7.4	9.6	1651.9	364.5	8.5	5.2	7.8	3.5	3.4	3.7	4.8	4.4	6.8	3.3	3.6	5.8
CCL21	8.3	14.4	33.5	7.1	105.8	12.6	64.6	63	7.9	79.5	40	12.7	33.9	11.3	9.9	12.5	63.7	8.1	44.3	81.8
CCL22	8.8	19.1	11.6	11	12.4	11.1	17.7	17	9.2	12.7	8.1	55.2	22.2	7.8	15.1	11.8	22.3	11.9	15	29.3
CCL23	40.75	27.45	10.4	29.7	7.85	28.7	38.7	21	93.55	46.05	9.65	26.1	15.35	15.9	3.7	6.35	13.2	27.35	5.95	26.45
CCL24	5.7	4	37.2	5.5	5.5	4.7	7.9	15.7	3.4	24.7	14.3	6.2	10.5	3.3	5.7	7.7	5.9	24.5	9.2	13
CCL25	25	31.8	30.3	30.6	8	13.5	26.6	14.6	18.4	55.4	4	17.7	7.6	24.3	11.6	35.5	5.2	10.4	11.1	8.7
CCL27	11.4	24.7	26.8	13.5	42.1	21.2	4.6	8.3	18.8	7.4	11.4	43.9	20.5	5	4.9	8.4	19.7	6	20.8	43.2
CCL4	197.5	641.9	366.6	321.9	491.3	564.4	204.4	367.1	149.5	338.9	157.6	158.7	202.5	115	177.8	120.4	114	235.1	103.3	129.5
CCL5	21.3	15.8	47.9	35.1	26.35	34.4	57.05	52.3	28.85	118.35	161.55	59.35	78.3	48.1	64.2	46.7	103.7	67.95	66.25	69.65
CCL7	33.2	21.9	17.1	20.1	33.8	7.6	26.4	24.4	14.1	18.8	7.7	25.6	16.7	16.2	8.4	6	6.8	8.2	17	31.5
CCL8	235.3	191.1	135.4	275.2	184	487.2	152.6	373.3	96.6	245.4	114.6	104	135.3	100.1	32.1	76.2	34	83.8	63.5	64.5
CCNA1	15.3	33.2	18.2	41.4	7.8	13.2	9.1	36.4	6.6	68.6	32.6	35.8	27.6	26.6	6	36.8	14.9	45.4	36.6	48.2
CCNA2	36.95	29.4	17.05	25.2	16.7	35.55	27.75	22.05	22.6	33.05	40.95	44.2	40.45	36.8	26.25	17.6	28.25	21.7	40	59.5
CCNB1	36.1	25.9	37.5	50.3	41.6	63.4	48.6	59.9	35.4	45	52.3	35.1	38.9	45.7	55.8	17.9	57.4	60	63.7	63.1
CCNB1IP1	370.6	622.8	383.6	265.2	329.2	260.3	201.7	184.8	279.9	259.2	205.1	188	73.5	185.5	206.5	261.3	186.5	121	263.8	180.1
CCNB2	35.7	44.1	39	22.9	20.1	42	33.9	50.9	19.5	46.2	56.2	71.9	79	53.7	19.5	50.7	31.5	12.6	42.6	58.8
CCNC	614.1	352	270.5	237.5	294.8	381.1	281	263.6	330.1	277.7	378.8	410.7	627.5	362.1	418.6	408.4	261	390.3	269.9	189.5
CCND1	96.25	129.25	69	74.8	78.4	46.6	82.85	82.5	60.7	148.95	194.7	157.2	226.55	110.8	134.7	216.55	196.15	139.2	149.3	139.55
CCND2	608.367	357.267	427.1	264.233	209.167	171.8	198.767	182.7	154.267	286.8	470.8	483.5	306.667	377.033	469.8	502.967	466.1	312.3	410.3	348.267
CCND3	303.5	422	380.1	311.4	280.3	233	273.7	264.2	621.7	272.1	211.8	159.2	187.7	114.8	218.7	287.9	414.2	293.2	219.6	268.7
CCNE1	26.2	27.7	17.5	37.2	14.4	5.9	8.3	6	15.7	15.4	45.2	25.5	34	41.1	6.3	19.8	6.1	17.7	8.8	7.5
CCNE2	13.65	25.95	24.25	27.2	17	27.25	11.8	12.05	11.6	33.7	26.5	27.85	21.95	17.6	19.15	35	28.15	11	28.7	38.2
CCNF	6.65	5.85	18.25	12.1	11.9	7.6	12.2	12.35	10.8	13.05	29.35	16.4	19.65	13.75	16.7	20.7	9.95	7.9	10.3	5.3
CCNG1	337.6	461.5	525.9	274.3	645.2	778.4	442.8	374.5	468.5	539.8	538.1	526.4	481.6	554.6	669	600.3	534	546.3	483.4	489.1
CCNG2	299.267	393.267	393.8	168.9	240.667	353.2	222.233	172.7	275.233	167.633	193.1	201.133	246.2	194.233	204.767	175.9	147.467	147.067	194.4	183.433
CCNH	422.7	526.2	374	438.8	332.2	594.9	400.8	491.2	292.8	400.4	219.6	270.3	256.9	268.3	327.8	301.9	249.3	283.6	236.5	199.7
CCNI	800.6	1858.65	2037.5	1633.85	2313.6	2195.25	1893.55	1792.85	1749.05	1625.35	1662.85	1347.45	750	1724.8	1621.9	1705.35	1715.25	1506.65	1636.65	1609.7
CCNJ	31.9	31.6	19.5	22	28.7	36.3	26.3	38.3	14.6	28.3	57.7	44.3	21.3	45.5	30.3	36.1	49.9	27.3	39.6	27.5
CCNJL	48.2	39.1	8.1	41.9	66.9	44.9	85.2	34.7	65.9	52.5	60.2	39.3	36.5	34.9	21.6	45.8	45.8	34.1	47	59.5
CCNK	5.7	3	7.2	6.3	11	8.5	8	13	8	15.5	11.3	9.3	9.7	9.7	10.6	8.1	7.1	9.4	9.4	15.3
CCNL1	1020.7	886	1232.7	1206.6	1727.9	1819.9	1278.9	1237.1	817.1	855.8	579.2	229.2	165.8	800.8	291.2	187.8	233.2	169.1	247.6	296.9
CCNL2	125.1	121.4	89.4	118.5	246	11.4	129.3	160.7	164.9	93.1	195.7	74.6	142	130.1	101.5	44.3	237.6	142.7	152.2	179.2
CCNO	28.9	44.9	83.3	15.8	12.3	47.3	47	29.4	48.5	58.5	77.8	57	22.7	75.2	65.3	24.7	57.7	52.9	54	47.9
CCNT1	43.9	61.2	131.5	134.7	49.3	39.1	53.2	103.4	49.2	93.2	14.5	57.1	32.6	58.9	75.1	59.5	34.6	21.3	72.3	113.5
CCNT2	68.9	53.5333	69.2667	57.1333	40.3667	57.9333	29.8667	39.2667	42.6667	64.8	75.6	63.6333	77.4667	47.5667	59.1667	56	55.8333	58.0333	60.8	57.9
CCP110	134.1	96.5	65.4	67.4	82	138.5	62.1	65.6	79.3	30.9	55.6	61.2	134.6	112.2	72.2	80	70.8	101.6	66.2	102.6
CCPG1	85.8	119.3	66.1	86.2	105.8	120.7	91.2	75.7	81	75	102.1	112.7	79.4	83	78.1	90.4	74.6	92.9	82.1	103.9
CCR1	309.85	179.05	95.15	179.45	164.75	160.5	203.5	62.25	227.3	349.25	289.55	337.65	308.2	157.6	236.7	479.75	379.9	579.05	303.9	320.9
CCR10	27.8	45.9	20.9	4.7	87.6	35.8	55.3	69	49.8	42.2	25.3	35.2	31.1	36.7	39	27.1	39.4	35	41.8	54.4
CCR2	32.8	45	47.15	45.15	36.5	39.45	46.85	43.8	17.3	77.1	75.25	65.95	43.95	54.95	79.5	74.3	81.7	50.1	79.4	101.7
CCR3	28.8	32.2	4.8	36.7	31.4	25.3	23.8	29.8	18.6	49	5.4	2.8	28.8	23.8	30	48	35.6	12.5	26.3	34.8
CCR4	6.1	29.2	10.2	26.8	51.1	40.7	73.7	53.1	35.8	70.6	55.5	53.5	39	41.2	49.6	4.8	34.7	24.3	52.5	107.3
CCR5	55.1	12.1	15.4	16.7	24.8	20.9	30	44.7	20.9	109.7	113.9	100.9	57.9	133.7	119.8	154.4	33.5	33.6	132.5	112.3
CCR6	16.6	8.7	24.4	11.3	6.8	12.3	1.3	2	3.7	19.5	10	16.2	22.1	11.4	8.4	3.7	7.8	6.6	11.3	21
CCR7	22.8	42.5	29.2	46.1	23.7	38.7	54.6	67.6	10.1	69.1	47.3	53.6	86.1	52.9	78.7	34.7	29.4	36.5	62.1	102.5
CCR8	25.8	18.1	20	40.6	20.3	40.3	50	44.3	47.5	30.6	37.3	30.8	18.3	21.9	15.1	7.4	29.9	17.5	32.6	74.6
CCR9	42.3	30.7	47.8	43	24.7	22.8	21.6	8.9	21.4	59.5	45.6	29.8	36.8	27.7	21.4	49.2	11.1	9.8	35.8	53.5
CCRL2	95.3	84.8	44	28.8	9.8	29.2	10.7	34.2	53.6	56.9	25.3	80.4	63.6	58.9	67.7	35.4	9.1	41	35.6	15.1
CCRN4L	78.9	83.4	81.8	78.9	84.2	86.7	101.1	91.9	71.9	156.3	122.1	94.9	74.4	60.4	67.3	83.6	83.5	48.4	92.9	153.7
CCS	67.8	112.7	110.5	58.6	48.3	48.6	60.3	118.8	189.8	126.4	62.5	95	100.5	85.4	87.9	42.4	120.2	100.8	153.3	159.5
CCSER2	134.9	109.3	125.1	107.95	82.7	134.3	62.05	97.35	112.55	87.5	121.1	125.7	76.4	120.75	155.15	110.75	135	101.1	104.5	123.9
CCT2	814.35	239.7	239.75	374.65	406.45	316.7	675.75	363.8	259.7	367.75	278.85	309.05	125.55	274.5	313.95	253.6	280.75	309.15	270.1	241.7
CCT4	885.3	1230.8	973.4	912.2	918.2	545.8	1280.3	548.9	777.3	633.7	997.4	1138.4	1074.4	1196.4	1141.4	1289.2	822	1072.9	954.3	915.1
CCT5	826.5	416.3	407.6	582.6	453.3	268.7	663.1	456.2	400.3	655.5	501.2	388	311.8	373.9	315.3	449.5	495.7	540.1	489.7	461.4
CCT6A	523.35	175.45	183.7	369.25	242.9	162	238.15	157.35	163.2	159.25	216.45	150.45	248.5	216.55	152.85	204.5	157.75	105	116.2	144.05
CCT6B	74.3	54.5	78.6	84.8	86.9	83.4	69.2	72.3	52.7	92.3	62.9	81.7	106.6	51.9	81.4	67.3	61.9	50.2	63.5	75
CCT7	726.2	502	319.3	493.8	272.4	161	407.2	220.1	322.9	371.7	225.4	299.6	620.1	415.4	325.1	459.5	242.1	276.7	252.5	144.4
CCT8	298.8	338.4	460.5	355.35	304.45	325.75	379.4	260.4	283.35	353	262.7	286.3	176.35	258.7	297.75	278.5	341.6	279.35	305.35	250
CCT8L2	5.6	8.4	37.2	3.6	9.3	7.4	7.1	16.7	5	27.6	7.8	17.9	55.4	3.3	4.3	7.1	8.6	8.5	8.6	33.9
CCZ1	44.1	95.8	108.1	52.1	80.1	76.3	93.6	93.4	52.7	122.4	112.1	69	91.4	43.1	50	95	83.8	57.3	94.2	177.7
CCZ1B	39.6	39.9	29.7	65.5	78.8	107.9	33.2	56.2	61.7	80.2	48.8	33.5	10.6	48.6	27.9	35.3	33.2	49.2	32.3	20.2
CD101	8.7	5	27.5	43.5	25.7	7.3	19.9	43.8	9.5	45.1	29.8	10.4	38.2	30.6	33.8	63.5	13.3	11.1	26.8	68.7
CD14	1190.6	828.2	425.2	772	1884.1	345.5	1082.6	475.8	894.6	1273.9	784.4	1653.6	1318.6	1263.9	1755.6	2235.9	1883.4	3855.4	1433.8	1713.1
CD151	140.3	184	212.7	287.5	170.8	52.2	200.4	288.4	284.7	227.7	259.2	257.6	324.9	299.8	265.1	302.1	350.3	325.7	273.6	145.9
CD160	12.7	24.9	42.1	22.2	19.7	27.7	31.1	42.1	16.1	62	38.9	16	29.6	18.6	9.3	43	10.4	33.2	29.1	46
CD163	5145.7	3046.17	2708.4	2550.63	1084.57	2243.47	1238.97	387.6	2794.13	1947.17	784.2	1649.8	1665.37	967.467	1895.07	1748.2	1652.3	2130.97	993.8	1076.8
CD164	1612.8	1008.23	662.767	724.033	554.333	854.733	656.967	382.867	810.667	607.367	703.6	869.467	1431.17	912.033	1325.13	1294.83	1289.03	1491.43	771.867	641.967
CD177	51.4	75.7	120.8	86.2	62.2	56.2	69.5	55.1	27.1	48.3	44.4	52.7	12.7	55.8	20.8	49.1	56.5	9.8	51.4	61.6
CD180	99.2	61.4	35.3	15.8	39.6	48.9	50	64.4	55	125.7	142.2	255.4	225.4	62.7	230.1	89.3	113.3	245.8	126.1	131.5
CD19	36.5	16.1	34.4	10.5	3.6	57.9	21.4	59.8	40.3	37.5	32.5	48.3	38.4	28.8	42.6	40.6	44	66.8	37.3	63.6
CD1A	64.5	79.3	80.3	62.5	95	116	112	154.8	66.9	134.6	83.3	91	81.5	97.4	75.6	71.9	95.9	85.6	88.5	191.5
CD1B	45.6	5.4	7.8	36.3	4	6	13.7	16.4	8	20.8	27.8	25.1	11.6	17.2	20	32.8	11.9	9.4	12.2	47.5
CD1C	2.7	5.3	50.7	7.3	5.6	3.3	3.9	6.6	3.8	7.1	11.8	14.9	3.8	34.4	9.3	87.5	5.1	4.9	12.4	22.8
CD1D	32.7	19.5	6.1	27	40.4	11	43	14.3	36.5	18.3	18.7	20.9	22.4	13.3	21.8	16	20.2	23.4	20.9	40.9
CD1E	7.6	10.7	39.7	17	7.75	17.15	7.1	8.95	7.5	11.35	21.35	26	32.6	21.8	23.1	14.15	4.2	8.05	18.15	28.3
CD2	50.3	29	42	29.1	43.1	42.7	61.2	32.7	39.7	154.9	168	121.6	204	79.4	122.1	114.8	103.6	103.3	165.2	145
CD200	54.3	26	53.05	45.1	75.7	77.25	183.8	116.4	24.85	55.3	84.35	42.15	53.95	81.6	32.9	70.7	72.1	56.5	91.3	106.25
CD207	43.1	27.5	7.4	4.5	10.2	46.7	47.1	101.2	33.2	72.5	34.2	13.9	43.3	38.4	37.3	19.9	28.7	34.5	49.9	67.2
CD209	146.95	97.55	45.6	93.5	109.8	84.9	59.9	96.05	66.35	167.05	64.1	82.6	97.3	87.2	51.3	115.35	56.65	92.75	77.85	115.55
CD22	18.6	21.7	37.375	22.625	48	41.425	48.65	54.025	31.925	39.425	39.3	34.3	33.725	20.1	36	32.375	38.1	42.275	34.55	47.725
CD226	12.6	25.6	8.7	17.7	6.6	20	18.3	17.2	8.7	37.4	13.7	19.7	14.3	13	8.3	21.3	12.4	15.1	20.3	35
CD24	16.55	30.0667	27.9667	44.4	43.3167	54.6333	16.8333	59.7667	25.2333	50.2333	51.5667	30.2167	58.2833	34.75	51.5	54.2667	36.2833	37.95	43.05	70.6167
CD244	10.7	6.7	8	7.2	28.9	13.5	17.9	14.1	10.6	40.5	8.5	36.5	34.4	16	7.4	19.9	24.4	8.7	50.8	57
CD247	32.3	33	15.1	15.3	22.6	31.9	29.8	26	34.7	32	37.3	26	53.4	9.7	18.9	14.4	58	63.7	46.1	45
CD248	237.2	248.6	468.9	1716.1	645.8	964.2	401.3	987.2	865.3	1140.9	557.4	486.4	550.9	811.2	334.9	588.3	706	876.7	599.8	734.9
CD27	32.5	41.8	38	57.3	48.8	46.5	88.4	46.5	43.5	77.7	49.5	54.3	112.5	33.6	40.8	63.7	52.2	58	102	171.4
CD28	19.7333	31.5	22.1	23.6667	24.9667	25.1333	29.0333	20.0333	17.8	42.6333	52.9667	69.4667	69.9	28.2333	57.2667	30.2333	58.8667	101.867	36.7667	72.7333
CD2AP	50.5	107.2	81.5	51	102.1	109.2	77.6	54.4	93.5	67.5	88.2	79.8	47.1	68.4	100.9	102.5	87.4	102.6	92.9	82.3
CD2BP2	97.4	103.1	119.2	121.75	67.1	42.35	47.7	54.85	107.9	61.15	56.25	96.15	111.35	106.4	97.05	106.8	76.1	78.6	93.4	86.2
CD300A	35.4667	21.2	23.4667	32.3333	19.6333	34.8333	42.6667	37.3333	19.8	33.0333	38.7333	83.0667	71.1	25.3667	65.5	46.8	55.8333	56.9	68.7667	53.0333
CD300C	58.2	46.9	60	80.9	51.9	41.5	64.4	49.2	73	85.5	74.3	106.4	88.9	92.3	103.7	148.6	155.6	112.4	123.2	136.3
CD320	51.5	72.6	65	104.5	31.1	21.7	82.7	52.2	119.1	33.3	80.2	80.5	62.2	10.4	122.1	45	116.4	74.3	120.8	93.6
CD33	43.3	60.6	14.3	15.8	9.1	16.7	13.8	12	35.5	17.5	27.1	70.8	70.8	17.4	33.7	22.1	27.9	62	12.2	29.7
CD34	90	159.3	171.3	227	648.8	333.9	315.2	406.7	260.7	470.8	335.5	203.6	85.8	362.8	105.5	235.3	315.4	219.2	367.4	315.4
CD36	277.267	79.6333	89.1	104.233	67	122.5	56.4667	117.867	105.533	171.567	91.3	135.567	121.9	236.533	124.2	173.267	81.8667	75.0667	107.233	145.733
CD37	85.1	115.3	82.3	48.4	7.5	35.6	51.5	7.8	273.8	106	176.8	316.4	139.8	130.8	153.7	192.2	205.9	343.3	239.8	148.6
CD38	109.6	44	59.9	49.1	28.2	48.5	76.1	8.6	25.5	181.6	20.6	31.9	53.6	22.7	55.6	58.4	14.9	51.7	48	74.5
CD3D	50.9	24.3	56.9	42.7	34.9	51	62.4	58.6	33.4	132	134.8	78.5	121.8	85	119.7	70.5	86.9	84.6	110.5	127.6
CD3E	81.7	68.4	77.7	66.1	68.9	31.6	119.9	91.7	36	138.4	104.9	62.4	76.2	63.5	61.4	85.6	63.9	58.2	110.7	123
CD3EAP	124.7	63.8	96.9	16.6	64.1	134.8	99.3	44.6	62.9	115.9	34.1	96.2	105.4	48.8	80.5	110.5	62.6	54.2	52.6	159.8
CD3G	4.2	5.8	15.1	4.6	10	8.4	10.9	10.9	5.1	12.7	13	8.8	7.8	10.8	9.2	8.7	14.7	8.9	9.3	13.6
CD4	65.5	123.85	114.6	84.45	59	106.15	70.9	56	88.9	89.15	151.25	298.7	152.5	136.7	152.2	201.05	226.85	298.55	197.35	166.1
CD40	105.075	110.65	119.675	106.5	185.875	107.8	223.075	142.6	123.075	139.25	105.55	121.45	133.25	109.925	128	111.075	176.4	151	163.05	144.175
CD40LG	6.3	6.9	16.5	6.8	11.6	9.8	15.7	16.2	7.3	11	10.6	14.9	2.5	6.1	7.5	7.2	12.4	17.9	10	16.5
CD44	478.325	1015.96	508.525	703.663	960.85	586.638	1002.61	1038.79	471.25	464.2	446.875	663.763	364.45	814.013	632.5	909.525	660.5	551	585.237	602.638
CD46	234.133	262.2	176.733	186.733	193.067	210.2	192.233	127.667	211.233	160.067	169.1	322.133	291.6	260.7	357.267	346.767	330	299.6	286.867	230.2
CD47	321.55	243.2	262.225	313.65	294.175	365.275	346.125	288.725	213.725	326.6	359.35	391.1	463.225	452.45	391.975	358.4	435.25	460.125	366.575	323.4
CD48	94.4	87.5	123.4	97.2	101.8	108.8	160.6	87.5	68.4	188	158.9	240.8	118.4	131.2	207.1	137.9	224.8	158.4	200.6	237.2
CD5	9.6	17.7	61.6	43.3	32.3	49.7	33.4	24.8	24.8	73.7	61.7	18.5	94.3	20.4	23.4	80.8	19.3	26.8	113.5	39.8
CD52	32	15.2	6.4	7.15	5.5	6.55	8.55	12.7	6	57.65	77.45	191.1	26.85	80.15	119.85	65.45	141.3	165.15	94.1	32.5
CD53	1779.1	1029	788.8	955.8	404	579.1	691.8	296.3	881.2	1017.1	908.1	1444.6	588.4	1050	1682.2	1441.3	1149.1	2081	1189.3	1227.4
CD55	286.15	488.5	298	382.75	420.75	394.75	288.5	383.2	479.65	242.5	321.05	547.6	382.25	748.1	742.9	700	825.05	644.55	714.3	456.85
CD58	193.32	159.82	107.82	92.38	74.72	128.28	63.66	38.22	119.84	129.48	112.72	223.82	210.02	157.52	177.68	262.64	196.02	256.94	145.42	126.94
CD59	1017.58	720.425	601.175	649.575	891.875	615.125	1479.55	1062.97	851.825	928.325	884.3	1382.35	236.7	1164.33	1132.17	1118.6	931.075	1312.05	835.475	803.35
CD5L	16.7	23.3	19.7	18.5	23.2	44.2	36.4	22.4	15.8	32.3	6.1	45	24.8	10.1	12.9	18.4	6	5.3	26	59.2
CD6	24.075	31.075	43.8	28.675	32.375	36.2	39.7	42.4	23.55	75.125	35.875	46.95	39.025	40.375	44.375	34.775	57.925	55.35	45.425	65.45
CD63	5703.1	3241.5	3218.1	3979.4	3795.5	2647.6	4501.2	4160.8	3541.6	3252.1	5292.1	5649.5	5986.4	6049.6	7307.2	5288.3	5115.4	5274	3881.2	4222.9
CD69	154.8	65.5	145.4	82.1	59.4	208.5	105	51.1	116.1	207.8	86.9	70.1	46.3	64.2	33.1	17.7	34.1	52.2	57.2	48
CD7	4.2	11.05	7.65	4.75	6.8	6.75	4.75	9.2	6.8	6.5	7.7	5.8	5.95	4.65	12.65	17.15	7.05	3.6	5.55	5.95
CD70	11	58.9	38.4	31.2	15.5	36.1	87.8	52.2	33.2	79	54.9	42	41.9	78	7.4	65.2	25.4	32	31.5	38
CD72	20.7	5.9	3.4	7.6	35	17.2	7.1	23.1	37	5.4	27.8	11.5	2.4	25.3	25.1	20.2	43.3	38.7	4.1	3.7
CD74	2700.9	1927.4	2070.1	2015.8	2508	2215.6	4746	1956.4	2685.4	4424.7	4043.3	7730	4899.9	5303.6	7740	8483.7	7193.8	6892.3	4004	3552.9
CD79A	38.8	32.1	97.5	54.8	28.4	46.4	75.2	90.1	33.1	91.5	75.6	41.7	73.7	36.5	93.3	51.7	152.8	103	94.9	171.6
CD79B	17.1	13.7	20.5	41.2	58.5	57.3	61.2	60.2	47	54.2	33.4	29.2	24.9	49.3	39.9	33.4	49.9	35.3	57.1	49.2
CD80	54.5	65.5	121.7	79	88.5	78.3	106.3	87	64.1	119.3	101.6	103.8	71.8	71.4	98.3	100.5	85.7	66.3	94	165.3
CD81	2001.4	2745.7	2174.3	2684.8	2920.6	2484.9	3184.3	2757	3628.5	2854.8	2577.9	3000.3	3602	2991.6	3073.5	2446.3	4840.5	4090.6	2897.7	3860.2
CD82	93	114.5	104.9	157.5	104.4	56.7	129.6	183	164.2	223.1	386.7	274.2	327.4	193.2	190.6	155.2	356.9	140.7	654	421.8
CD83	111.9	356.5	211.8	457.5	488.6	269.9	100.4	204.6	114.4	152.8	186.1	169	92.3	130.5	54.6	76.3	135.3	134.3	93.5	187
CD84	112	87.9	73.1333	74.85	67.4167	85.3333	64.9167	42.8333	76.5833	100.067	133.45	315.217	84.0333	92.55	156.833	134.083	101.05	214.217	157.417	193.467
CD86	47.1667	102.6	90.4333	77	68.8667	84.2667	23.7	29.2667	99.3667	67.9333	102.3	178.833	64.8667	101.267	149.833	148.6	117.033	201.2	120.567	120.233
CD8A	52.9	34.5	24.3	86.3	53.3	66.3	77.6	42.8	44	188.2	97.1	32.2	67.7	62.1	64.9	71.4	116.3	115.2	137	93.3
CD9	1321.5	1100.6	1787.6	936.8	1671.5	2368.5	1062.3	1887.3	2239.5	1571.4	818.6	1369.7	2339.4	2688	1680	2649.4	2509.3	1418.5	1721.1	1365.7
CD93	195.75	172.5	314	301.2	657	430.1	895.1	855.45	426.75	344.9	418.6	207	183.4	411.15	154.1	268.6	303.45	238.5	300	349.4
CD96	8.5	19.7	38.2	10.6	13.9	14.4	20.5	7.7	13.4	43.4	49.8	15.1	51.4	7.1	33.1	4.3	20.9	29.9	19.3	25.9
CD97	84.5	210	186.5	227.8	192.9	76.8	119.2	222.1	102.3	185.7	179.3	162.8	176.9	199.6	140	253.1	206.3	235.3	159.3	255.5
CD99	1232.55	1961.3	1257.15	1692.75	1816.9	1548.95	2009.65	2385.95	2313.55	1944.25	2524.3	1801	1945.8	2218.45	1922.45	2464.1	2953.15	3191.2	2014.9	2287
CDA	18.8	80.4	65.1	39.6	8.7	7.6	17.6	18.1	59	19.3	25.7	6.2	10.5	11.2	14.8	40.2	4.9	6.9	7.5	6.3
CDADC1	66.1	19.9	37.1	34.1	47.8	35.5	35.5	40.3	47.4	50.1	34.9	36.1	38.6	44.1	19.5	17.4	21.3	37.3	35.8	35.7
CDC123	508.1	375.8	348.5	368.1	329.8	272.8	419	249.7	299.6	406.2	388.3	387.1	710.9	425.7	362.4	241	328.4	372.8	433.3	449.1
CDC14A	22.8	21.96	14.48	22.4	21.68	24.98	21.04	21.38	18.52	23.06	22.72	17.4	29.72	15.22	16.24	21.86	12.54	11.7	26.76	25.32
CDC14B	58.78	84.36	120.16	80.36	114.7	136.52	61.68	120.56	114.6	74.52	121.66	93.18	97.04	107.66	69.88	70.36	61.78	70.04	94.32	117.44
CDC16	176.667	157.667	280.067	211.267	145.467	229.6	140.2	153.267	180.7	174.467	282.3	274.6	267.4	252.1	278.9	136.4	229.4	246.7	320.167	265.1
CDC20	3	4.7	3.2	3.8	9.1	3.4	26.9	16	6.6	10.4	12.2	14.1	8.8	26.9	11.3	9.7	6	9.8	9.6	11.7
CDC23	108.6	79.6	90.5	95	86.2	153.8	71.5	65.7	116.8	108.3	127.1	109.4	90.4	105.5	119.4	136	112.5	126.5	116.9	73.7
CDC25A	5.3	4.65	10.75	7.1	6.75	7.7	12.65	21.55	6.4	9.45	22.45	20.35	19.9	9.55	4.6	5.5	11.9	7.1	13.55	20.2
CDC25B	199.8	183.4	235.2	270.9	233.2	236.4	190.5	287.6	285.8	227.8	277.7	209.4	230.8	207.9	159	204	258.8	264.8	307	307.9
CDC25C	17.2333	21.9333	21.5	23.8333	17.5667	16.8	22.4333	42.9333	24.6333	33.6333	30.9667	12.1	6.66667	15.2333	11	22.4	26.7	17.3	26.5667	36.8
CDC27	100.375	123.175	111.8	116.025	201.8	176.925	118.95	131.725	120.625	127.1	131.4	124.725	149.9	105.15	135.575	117.05	116.2	140.925	139.2	154.975
CDC34	51.1	72.4	89.3	55.7	154	53.5	136.4	120.7	149	106.4	81.2	78.3	85.4	61.6	30.5	66.3	112.5	141.9	122.2	127.5
CDC37	199.2	200.7	149.1	305.3	352.2	46	289.6	236.1	254.8	278.7	172.4	112.9	167.5	220.8	151.2	211	237.1	150.1	327	258.3
CDC37L1	153.2	204	97.1	181.2	208	180.8	140.7	79.1	143.6	205.9	111.6	129.9	136.6	78.8	112.6	118.8	133.5	101.3	125.2	124
CDC40	249.6	192.55	156.45	116.15	161.8	196.15	105.15	97.5	148.25	163.75	169.9	202.25	146.5	154.5	207.55	168.45	165.8	166.55	157.4	122.8
CDC42	198.95	104.275	192.6	186.025	147.675	154.45	208	340.525	115.9	369.625	147.325	251.1	81.325	152.075	151.425	120.175	125.225	104.6	198.725	114.85
CDC42BPA	68.075	80.725	95.35	69.825	91.325	102.775	71.5	121.4	89.15	115.95	164.125	81.35	94.075	120.725	77.4	79.525	73.275	101.025	106	123.475
CDC42BPB	68.8	86.8	99.4	142.2	212.4	128.3	140.2	197.4	248.2	226.9	97	157.7	124.3	135	105.7	120.1	291.5	155.7	130.4	158.4
CDC42EP1	36.9	35.1	22.6	85.7	137.4	47.6	210.9	195.2	110.4	97.7	73.8	45.1	23.2	98.7	61.4	33.5	53.4	66.9	98.7	65.2
CDC42EP2	54.65	64.95	39.35	58.1	81	54.4	52.7	169	100.1	50.85	52.5	13.95	60.5	49.55	19.2	50.8	55.45	36.3	74.15	35.6
CDC42EP3	92	83.0333	86.8333	78.9667	153.233	97.1333	278.533	148	134.133	145.767	79.5333	52.3667	47.0667	67.4667	45.7667	32.9	50.1	41.0667	63.6667	60.8
CDC42EP4	95.7667	281.5	244.567	430.333	517.8	366.167	280.5	418.433	347.467	288.4	133.433	136.167	135.733	109.667	81.9667	152.5	165.667	129.5	207.567	200.067
CDC42SE1	265.5	426.6	456.9	393.2	356.7	451	353.2	479.2	376.8	423.2	390.8	354.4	369	278.6	313	321.6	320.1	242.7	371.9	426.6
CDC45	5.7	1.9	5.9	18.9	2.9	3.5	3.4	4.6	4	7.7	4	3.2	3.2	3	18.1	10.2	3.9	3.2	2.5	4.1
CDC5L	152.275	205.275	149.775	96.2	103.775	163.625	106.725	84.65	115.575	115.3	78.925	123.75	86.875	108.675	127.425	111.25	106.35	71.4	94.95	89.3
CDC6	47.65	25.2	26.65	29.45	23.5	24.55	21.45	49.45	13.75	33.6	39.35	24.7	34.75	28.65	36.25	34	23	22.1	16.5	36.15
CDC7	53.4	59.5	65.2	95.3	117.5	74.8	90	137.3	70.1	105.6	58.1	56.3	40.5	56.3	45.1	43.2	75.5	46.7	68.6	75.3
CDC73	220.4	179.8	124	65.6	98.8	123.8	65.3	65.2	66.1	110.8	69	119.5	215.9	103.3	110.5	125	46.5	112.2	98.5	49.3
CDCA3	8.7	26.3	14.6	27.9	20.6	8.2	4.9	16	30.2	19.2	29.2	24.7	9.7	20.6	10.7	13.2	18.6	8.2	19.4	12.8
CDCA4	112.2	94.3	132.1	120.4	124.1	85.4	109.4	140.8	123	133.2	142.6	137.4	144.4	103.4	97.3	130.6	114.8	134.9	148.7	156.8
CDCA8	10.7	10.8	9.8	11.7	11.2	9.2	12.1	9.8	9	11	11.6	9.3	9.1	14.6	9.1	16.3	8.1	9.9	9.7	11.6
CDCP1	13.4	7.3	17.8	21.6	27.6	21.6	13.9	15.1	13.5	71.1	27.6	28.4	14.9	11.3	17.7	39	12.6	21.5	70.3	37.1
CDH1	6.65	4.65	7.9	10.75	7.15	5.7	8.25	4.9	9	7.7	4.35	5.15	7.25	5.4	13.15	14.45	3.65	2.75	7.65	8.8
CDH10	59.7	28.4	56.9	53.9	62.1	29.9	56.1	44.7	37.8	63.8	37	35.5	32.1	45.3	34.1	33.6	43.7	35.9	48.3	49
CDH11	295.4	61.65	152.05	111.3	395.85	215.5	384.65	192.7	282.85	163.75	905.35	451.7	435.3	666.6	668.6	200.45	622.85	608.7	556.8	429.2
CDH12	22.8	2.7	23.3	10.2	2.3	2.7	2.2	1.2	2	32.9	6.3	7.8	6.2	18.7	1.2	29	3.9	2.2	3.7	25.4
CDH13	78.9	19.9	29.2	31.1	15.4	49	11.9	25	25.6	10.1	57.3	14.7	45.7	102.3	104.6	41.9	50.6	21.4	33.8	32.4
CDH15	21.55	27.8	52.25	60.25	29.05	16.25	31.7	17.1	26.65	20.35	21.05	21.65	35.65	33.75	13.85	17.65	11.25	8.35	29.85	12.8
CDH16	9.7	2.4	3.7	3.9	12.4	4.4	6	16.4	9.9	2.9	5	10.4	16.8	4.4	2.3	2.6	10.8	4.9	5.2	2.7
CDH17	28.7	3.3	12.7	18.6	6	4.5	6.8	6.2	4.7	8.3	4.4	14.7	17.3	15.9	3.7	19.5	38.9	5.2	10.5	10.5
CDH18	21.1	38.8	74.5	62.3	89.6	82.3	105.4	72.5	56.1	51.5	51.8	44.9	11.5	44.2	50.5	43.9	83.3	62.5	53.7	64.9
CDH19	34.2	23.8	46.3	29.1	26.2	67.4	64.8	22.2	19.5	40.1	2.6	2.6	1.2	21.9	0.5	17	7.2	10.4	17.6	17.4
CDH2	13.65	18.9	57.35	16.5	20.55	18.2	34.95	39.05	10.8	21	17.85	59.65	36.2	16	60.35	19.45	51.75	68.65	64.45	58.95
CDH20	2.3	3.4	7.1	3.2	2.7	5.8	4.4	4.8	5.5	5.4	6.5	4.2	3.7	4.9	1.9	2.9	5.7	3.5	3.5	7.2
CDH22	29.3	26.1	7.5	16.6	11.6	13.7	8.7	14	3.6	11.8	16.8	24.3	41.6	50.8	6.4	21.3	11.3	6.1	8.9	12.3
CDH3	10.1	6.2	5.2	6.3	7	6.2	7.9	8.5	5	8.1	9	6.5	2.1	3.8	2.9	5.7	3.3	6	8.6	9.8
CDH4	29.75	26.35	21.7	39.15	34.9	29.6	51.95	31.7	17.05	44.6	61.95	53.55	36.45	44	39.55	34.6	29.45	38.75	48.5	56.45
CDH5	68	46.8	109.6	117	246.8	173	203.5	150.8	194.3	148.2	189.5	109.6	75.1	169.7	76.5	124.7	164.3	84.5	150.5	140.4
CDH6	18.72	25.94	43.56	20.12	21.64	29.62	22.24	41.98	24.5	29.88	54.84	24.6	27.56	47.56	19.56	19.84	22.26	26.84	38.48	72.16
CDH7	2.4	4	5.7	7.9	3.3	3.2	5.3	5.9	3.3	4.6	12	6.4	5.2	4	3.4	4.4	5.7	3	2.5	3.3
CDH8	24.75	12.6	17.85	10.1	25.85	37.6	32	27.55	23.25	32.5	44.3	21.2	17.45	11.85	34.55	18.35	32.95	25.4	19.45	43.3
CDH9	13.5	9.4	20.6	13.7	5.7	34.3	25.5	36.9	24.9	61.4	25.6	5.9	10.2	9.4	6.5	11.9	3.1	24.1	28.6	39.4
CDHR1	1.6	8.7	30.2	3.9	2.4	1.7	2.1	4.4	2	4.3	5.7	2.6	3.8	3.8	2.8	3.3	6.1	2.4	1.9	2.8
CDHR2	36.2	55	78.5	41.3	43.5	55.4	64.2	69.1	46.3	96.3	102.8	55.7	59	33.9	57.3	50	78.8	60.8	77.4	94.9
CDHR5	3.06667	2.03333	4.46667	3.3	3.53333	2.4	4.43333	5.23333	3.46667	5.43333	5.06667	2.66667	2.26667	4.03333	3.66667	4.56667	5.36667	4.2	3.53333	4.83333
CDIP1	62.9	60.5	75.3	67.3	19.6	12	25.5	34.8	48.6	33.6	57.2	69.3	83.8	66.9	76.9	40.5	65.1	20.5	57.5	43.9
CDIPT	1339.9	801	634	609.8	473.9	920.2	454.2	587.2	799.4	1504.5	588.7	418.6	1579.7	696.6	614.5	581.5	523.6	534.6	1154.2	1804.5
CDK1	34.3667	25.0333	11.6333	28.5	13.6	31.9333	18.1	19.9	13.3667	31.4667	45.7667	41.4	32.8	51.2667	40.5667	32.6	32.0667	19.6	37.3	32.8333
CDK10	34.8667	63.5667	34.2	53.8	15.7667	6.3	34.2667	38.6333	31.3333	44.7	28.5333	38.9333	45.1333	45.7667	34	18.9667	61.2333	46.7667	44	54.5667
CDK12	55.4	66.85	74.65	101.35	84.75	100.1	87	71.25	94.95	128.35	71.8	54.45	73.65	51.75	77.8	60.65	78.35	91.4	99.9	137.4
CDK13	59.06	45.54	61.38	67.58	79.58	76.68	46.3	50.46	63.72	62.02	50.76	50.48	41.18	50.18	45.98	46.74	49.24	59.32	50.02	71.78
CDK14	93.4	98.85	165.55	150.1	166.15	232.45	140.7	193.8	164.4	221.7	205.25	201.55	201.1	204.65	218.7	210.4	199.25	242.35	289.55	307.85
CDK16	108.467	118.767	145.5	145.9	171.333	97.1	179.833	207.2	159.967	177.767	186	128.233	122.567	134.5	112.2	130.767	149.6	113.3	158.367	183.067
CDK17	172.2	233.75	161.1	150.1	218.35	287.45	352.05	328.2	214.85	176.1	133.65	157.95	186.9	159.9	109.2	172.7	163.2	138.7	140.2	140.8
CDK18	26.4	25.1	59.7	39.3	31.6	17.7	9.8	78.1	40	33.9	46.8	22.6	40.6	30.2	8.6	18.1	65	42.1	42.8	14
CDK19	79.8667	100.733	112.867	91.9	75.7	66.9	34.1667	55.4	73.8667	75.1	143.4	139.5	100	107.267	87.1333	84.8667	78.5	94.0667	129.533	140.233
CDK2	133.333	83.0333	75.1667	105.7	173.1	100.8	89.4	129.433	85.5	49.3	105.967	81.3333	85.0667	86.0333	41.9	67.1667	61.9667	43.9	55.9333	54.4333
CDK20	50.3	38.1	50.8	76.8	60.2	47.2	75.3	67.1	51.1	77.3	49.7	47.2	68.7	45.4	55.5	35.4	74.4	73.9	71.9	46.1
CDK2AP1	442	598.7	351.2	923.7	923.7	1247	670.8	830.6	1296.1	1284.2	1339	952.2	781.5	1164.7	1033.9	1307.4	1619.1	1049.4	925.5	827.4
CDK2AP2	80.9	110.3	65.9	71.4	85.8	42.5	123.2	101.7	133.6	100.5	60.2	51.5	79.5	74.1	87.1	73	152.7	97.6	91.5	90.9
CDK4	413.8	312.4	361.5	405.3	335.3	239.4	577.2	218.2	381.8	555.1	360.9	325.4	421.5	401.9	332.3	429.5	341.4	408.4	423	401.2
CDK5	3.6	3.4	15.3	5.9	4.3	5.3	7	13.2	19	11.7	9.4	25.2	32.5	41.6	12	7.3	20.6	23	49.5	9
CDK5R1	3	10.1	18.75	6.85	9.7	16.45	10.85	17.5	11.1	26.25	7.75	7.25	3.75	8.65	3.75	6.7	5.2	13	7.95	16.3
CDK5R2	1.7	8.2	3.9	1.9	2.8	13.7	6.5	5.3	2	5.8	3.9	2.8	5.5	2.5	1.9	3.7	5.3	5.3	2.9	5
CDK5RAP1	109.9	99.6	96.8	143.3	118.4	124.7	94.4	60.3	105.8	134.9	106	82.6	137.6	128.2	114	111.7	115.3	114.2	80.1	88.2
CDK5RAP2	69.1	91.7	120.6	78.2	22.3	11.7	22.2	52.2	62	66.9	135.1	103.8	121.4	96.6	107.7	82.6	22.7	54.6	58.4	42.8
CDK5RAP3	398.5	465.9	339.5	353.9	547.6	279.1	347.5	657.9	676.2	569.3	560.6	556.4	520.8	421.4	359.6	325	534.2	643	617.8	686.9
CDK6	9.8	4.7	6	9.5	9.4	19.6	10.9	15	16.7	15.5	33.8	4	18	11.8	4.9	15.2	19.6	4.5	10.6	17.4
CDK7	114.5	114.1	85.4	78.4	58.7	68.1	78.5	27.4	82.2	87.3	83.1	95.8	51.2	98.2	135.9	100.1	48.1	80.6	98.9	64.5
CDK8	37.8	45.8	21	30.5	43.1	31.3	24.2	16.2	41	44.3	64.3	34.1	24.5	38.5	32.6	46.8	23.5	29.7	38.9	27.4
CDK9	66.1	87.1	105.4	57.4	137.4	45.8	122.9	119.6	208.2	134.1	53.5	72.9	54.7	26.1	78.4	72.9	127.2	92.7	111.4	116.2
CDKAL1	8.1	11.55	8.1	17.1	6.15	3.85	7.1	7.65	7.45	4.1	43.3	16	24.6	34.25	32.1	24.05	31.55	3.05	11.6	8.5
CDKL1	2.1	6.9	8.9	4.3	3.5	1.8	5.5	4.4	1.6	4.5	5.2	4.1	7.8	2.1	4.6	8.5	4.3	4.2	3.6	3.2
CDKL2	4.1	5	10.4	8.9	6.7	16.2	10.2	15.3	17.4	17.2	17.7	5	4.9	3.6	6.3	9.2	3	4.2	7.4	13.4
CDKL3	53.3	51.1	71	28.7	7.7	59.2	6.7	19.3	24.9	86.9	60.1	36.7	70.3	92.9	62.8	74.6	3.5	19.2	57.5	13.6
CDKL5	23.95	14.8	37.4	21.15	18.9	22.75	21.55	24.35	16	24.2	22.4	13.25	23.35	23.9	27.4	29.95	13.65	18.7	25.5	36.95
CDKN1A	388.4	1360.7	1155.9	1811	1709.5	1510	1533.7	2490.8	1019.9	701.3	204.8	179.5	174.3	260.4	285.5	145.4	365.8	347.5	272.6	191.9
CDKN1B	504.2	657.7	983.1	487.4	536.8	1477.5	530.6	283.9	1061.1	635.3	380.5	362.7	357.8	585.3	567.2	496.8	373.2	416.2	466.8	400.9
CDKN1C	63.1	147.5	94.4	79.925	94.4	167.775	41.175	129.55	176.125	97	130.9	112.375	129.4	123.45	131.3	136.95	187.55	119.125	169.125	210.4
CDKN2A	29.8667	26.7	49.9	17.0333	35.6	42.6	45.1333	55.1333	39.5	67.3	47.8667	46.3667	50.2333	35.1	49.1667	55.2333	57.8	45	61.5333	77.8667
CDKN2AIP	66.4	120.5	132.3	69.1	138.1	117.6	52.9	52.9	90.1	119.6	89.1	94.5	98.7	75.5	99.6	95.7	100.3	130.3	90.6	80.2
CDKN2B	1.4	0.8	4	2	1.1	0.7	1.5	1.8	0.8	2.7	2.5	3.9	3.1	5	4.1	5.1	1.9	3.7	2.5	1.8
CDKN2C	137.7	169.3	136.65	95.65	77.85	300.35	19.45	81.5	135.05	86.4	83.05	136.25	194.25	119.3	107.5	120.8	105.9	98.15	194.15	111.1
CDKN2D	22.35	25.55	21.4	24.55	41.65	19.1	35.3	27.35	29.35	35.6	10	10.75	20.15	6.9	24.3	20.7	24.55	5.45	28.55	27.5
CDKN3	74.9	35.4	75.2	57.3	86.1	67.2	464.6	102.9	47.7	90.7	103.7	127.9	60	101.6	124.3	101.1	203.5	92.7	100.8	110.5
CDO1	3425.5	4373.4	4634.5	2372.3	819.5	3979.7	970	550.7	3808.3	1879.6	723.5	588.4	753.6	1513.8	986	2363.3	796.1	870.7	777.2	323.7
CDON	21.4	42.5	48.8	7.8	81.9	5.7	4.4	21	9	6.9	5.2	152.9	49.2	70.3	89.2	133.4	27.6	40.4	117.6	71.2
CDR1	1.7	6.5	24.3	8.7	0.9	0.6	0.9	1.2	1.4	1.1	1.3	7.7	24	9.4	14.7	3.5	0.9	0.7	2.1	1.3
CDR2L	34.9	17.1	10.9	39.1	63.9	34.7	14.9	51.1	51.9	27.6	66.2	3.5	31	72.1	12.5	61.5	58.9	13.5	34.1	44.2
CDRT1	13.9667	13.3333	18.1667	18.9333	13.4667	19.3333	34.8	24.5667	21.1667	26.7667	30.0333	24.9667	16	20.7333	23.4	11.3667	21.8	28.8	18.8333	33.7667
CDS1	15.4	9.45	7.45	13.2	1.35	1.7	1.15	2.9	3.65	11.95	5.1	3.3	8.9	16.7	9.3	21.1	7.15	3.5	1.75	10.95
CDS2	142.55	137	107.4	128.85	153.2	150.3	85.75	140.2	152.05	134.05	135.05	125.55	119.45	150.6	113	136.45	143.3	121.85	145.25	135
CDSN	6.25	5.85	6.8	7.9	9.05	7.8	11.45	12.5	8.15	13.25	12.15	14.45	11	6	9.6	8.25	8.95	6.4	9.65	15.8
CDT1	16.1	18.9	7.9	21.5	17.8	30.6	21.9	25.1	18	32.6	30.2	20.1	3.3	25	24.5	10.7	36.1	17.7	21.4	20.1
CDV3	424.033	420.433	240.633	257.233	309.1	344.967	274.533	340.5	275.433	211.467	204.6	256.767	214.2	206.6	230.9	246.667	192.767	210.267	164.3	146.3
CDX1	9.2	5.2	8.8	16.5	9	7.1	12.5	9.6	6.3	12.7	11.5	11.4	8.2	9.5	42.4	14.2	15.2	10.6	10	21.7
CDX2	2.7	4.8	4.7	4.1	4.9	5.5	9.5	7.6	3.5	7.5	9.5	3.7	4.1	6.8	4.2	10.2	4.3	4.8	6.3	6.4
CDX4	24.6	3.8	13.9	4.9	3.6	4.2	5.6	4.3	3.4	4.9	5.6	5.3	35.9	4.9	10.3	8	7	3.4	4.4	8.6
CDY1	13.1	2.7	4.9	8.5	1	2	0.9	11.8	0.9	6.2	10.2	2.4	2.7	2.5	1.5	9.7	6	0.3	5.8	6.9
CDYL	54.5	91.6667	69.0333	79.7	62.8667	87.3	13.5667	29.0667	57.3333	19.7333	70.2667	70.6667	77.7	57.2	60.5	71.1	67.3333	51.4667	56.3667	18.8333
CEACAM1	33.52	39.2	46.2	26.34	39.68	35.82	62.34	58.58	26.36	51.92	50.04	39.52	30.96	29.68	29.94	37.02	45.74	35.24	36.62	57.2
CEACAM21	44.75	46.1	24.65	39.75	32.15	29.7	38.5	16.55	21.55	32.45	35.8	52.4	23.65	35.1	44.9	46.6	27.5	29.6	38.85	51.55
CEACAM3	33.7	65.4333	90.7	72.7667	50.7333	42.9333	58.1	80.3	43.4667	99.0667	123.367	66.9667	83.7667	67.5	87.8333	90.2667	46.4333	56.7667	69.2667	89.4333
CEACAM4	25.8	58.3	62.3	70.8	57	60.6	95.8	74.4	47.1	100	80.1	75	41.3	65.1	33.3	68.1	51.7	60.8	82.1	110
CEACAM5	56.45	42.15	59.35	55.8	66.45	86.1	106.2	79.2	37.25	83	58.9	42	46.2	32.05	37.05	67.4	81.85	46	75.3	109.2
CEACAM6	13.65	29.5	47.6	47.5	33.5	46.15	71.7	71.8	27.9	68.1	19.3	54	47.9	25.7	56.45	27.95	60.05	36.55	69.35	58.8
CEACAM7	11.5	16.2667	27.7333	26.4667	12.5667	19.0667	19.3	21.7667	11.5333	31.8667	32.6	19.1	20.6	20.7333	22.4667	22.4	5.23333	23.3	26.0667	40.1
CEACAM8	0.8	3	1.2	2.4	1.2	2.4	1.1	1.4	0.9	14.7	3.4	3.2	16.6	1.4	4.2	22.9	0.9	0.7	12.4	5.7
CEBPA	55.6	76.9	100.3	103.8	248.1	127.8	78.9	80.3	124.2	448	329.5	587.3	441.1	183.8	319.3	177.5	659.4	698.4	679.9	435.1
CEBPA-AS1	107.4	132.3	143.4	118.2	124	100.5	162.3	175.4	119.4	152.3	141.2	114.5	124.5	114.7	149.7	143.9	124.8	91.7	102.8	197.6
CEBPB	5538.2	5378.5	5041.9	5040.6	4845.2	6453.2	5254.5	6010.3	4860	3608.7	1782.6	2546.4	3565.9	1354.7	1910.1	1747.1	2746.3	3651	2002.1	1416.6
CEBPD	1987.1	2846.8	4046.45	2155.8	2444.8	3436.9	3825.7	2738.55	2822.7	1935.55	434.3	451.35	625.3	430.2	483.6	355.5	904.2	1057.4	398.25	301.6
CEBPE	6.4	54.9	20	28.7	47.1	9.3	34	9.9	21.4	32	45.9	51.4	47	5.9	39.3	10.2	41.8	26.2	34.2	26.5
CEBPG	66	100.2	52.9	76.4	116	120.6	76.8	80.2	67.7	83.3	75.1	85.7	100	66.1	66.4	83.9	60.7	68.3	75.1	67.8
CEBPZ	130.7	256	203.9	201	205	287.5	195.6	195.1	166.1	159.9	169.5	115.8	72.7	85.5	124	163.5	116.4	74.4	99.8	79.7
CECR1	169.4	368.6	311.3	267.2	203.7	48.3	91.8	35.2	229.6	501.8	592.5	1089.6	662.6	548.7	914.7	611.3	777.6	1400.6	585.1	675.8
CECR5	199.4	312.9	189.2	281.6	174.8	119.5	226.9	111.7	169	248.7	198.4	174.7	189.7	199.9	199.2	187.2	159.4	150	206.9	217
CEL	2.4	6.1	3.9	2.7	2.5	2.4	4.7	2.8	3	3.9	7.6	3.6	2.9	5.9	4	3	6.9	2.9	3	4.6
CELA2B	12	15.9	36.8	17.9	13.2	8	36.2	18.4	6.5	18.5	15	26	24.3	18.3	34.2	15.1	12.2	8.2	27.4	45
CELA3A	37.05	52.15	43.4	42.75	39.25	37.45	60.55	81.55	51.95	52.1	65.75	44.3	50.55	38.15	34.4	52.2	47.15	40.95	43.55	62.15
CELA3B	9.1	29.2	11.4	5.3	8	6	17.6	14.8	7	17.3	55.2	9.3	4.3	12.9	4.8	12.2	8	10.8	16.9	16.6
CELF1	197.175	233.9	271.075	273.4	257.475	297.8	189.125	268.375	232.15	216.95	327.15	292.7	248.875	217.225	227.175	168.575	161.85	194.7	245.05	283.025
CELF2	558.133	733.867	608.533	498.567	416.533	774.9	275.567	340.333	800.6	577.067	405.733	278.533	314.133	463.933	342.667	649.3	329	494.933	336.067	402.3
CELF3	14.6	7.1	20.95	8.2	15.7	19.9	16.35	29	13.3	18.6	11.8	9.25	10.05	8.2	23.95	12.65	21.1	13.55	10.55	13.15
CELP	3.1	3.7	5.5	4	8.9	10.3	15.7	33.3	8.6	18.1	9.3	7.5	6.5	6.6	12.3	17.3	8.7	9	6.8	10.3
CELSR1	2.86667	2.36667	4.1	2.23333	4.96667	5.3	4.46667	10.6	3.83333	5.53333	11.4333	11	4.73333	6.56667	11.1333	4.93333	4	3.06667	5.06667	5.7
CELSR2	28.35	40.25	51.7	48.85	50.5	37.7	42.1	57.1	47.2	59.15	64.5	48.75	61.9	42.2	37.8	55.55	55.55	48.4	68.1	74.05
CELSR3	16.45	28.65	29.2	24.35	38.1	39	43.95	47.2	26.2	39.95	37.25	38.7	22.3	29.85	20.8	31.95	28.95	26.05	34.7	55.95
CELSR3-AS1	2.6	2.4	4	2.5	3	2.3	3.4	4.4	4.2	6.9	5.3	3	2.3	4.9	2.7	3.5	5.8	2.8	2.8	8.4
CEMIP	132.1	26.2	48.9	63	193.2	87.4	568.6	147.8	325.1	47.6	559.5	259.9	211.3	531.2	342.9	84.4	426	517.5	126.6	115.5
CEMP1	3.1	1.6	4.3	3.2	3.9	3.5	3.1	9.3	5.5	6	3.9	8.4	10.3	3	4.7	3.9	7.7	3.4	2.4	4.6
CEND1	58.1	69.1	96.6	39	106.8	75.4	98.7	83.4	73.4	118.8	117.2	68.8	77.5	64.1	57.4	89	77.3	65.8	82	137.6
CENPA	103	75.2	93.6	56	77	72.7	102.5	63	54.1	99.6	74.2	76.6	67.7	56.9	69.9	54.9	95.2	88.3	77.2	118.4
CENPB	109	89.2	57	185.7	168.5	66.2	175	119	126.6	109.4	84.6	75.3	149.9	138.8	88.9	113.2	154.8	125	86.1	72.7
CENPBD1P1	84.5	66.6	92.2	61.3	112.5	42.1	95.6	69.8	106.8	70.9	84.9	76.1	89.3	129.7	63.8	92.7	53.5	63.3	38.7	60.1
CENPC	65.6	113.4	109.8	74.3	96.4	178.6	44.4	81.4	153.9	105.6	94.6	91.5	90.2	68.3	91.3	64.6	116.1	110.9	98.2	89.8
CENPE	8.2	12.2	7.1	5.5	5.8	2.6	5.8	4	2.2	10.5	16.6	6.4	9.5	27	3.2	3.7	5.3	2.9	11.6	11.1
CENPF	12.9333	12.8667	10.6	27.1667	18.5667	23.5333	10.9667	19.8667	17.5	22.6667	31.0667	25.0667	10.1333	31.8	17.8333	19.1667	25.9333	18.6	27.9	24.9333
CENPI	3.95	5.75	16.15	13.4	2.5	7.7	15.55	5.35	6.1	10.45	6.45	24.4	9.4	22.1	11.1	20.55	4.65	6.85	10.55	17.15
CENPJ	35.1	27.3	73.9	26.6	46.9	37	48.2	58.2	31.5	74.9	23.7	53.9	62.8	42.3	77.3	44.1	42.3	30.8	38.8	57.9
CENPM	6.6	3.2	5.7	5.1	4.2	7.9	8.5	7.5	3.9	5.7	11.4	4.3	8.2	5.5	4.8	4.4	3.1	5.4	3.9	7.1
CENPN	9	9.55	17	22.1	17.3	15.9	10.45	22	13	16.15	24.2	7.3	13.7	18.4	12.3	16.05	8.6	16.95	3.5	11.75
CENPO	23.4	18.9	16.4	19.4	54.2	47.9	40.7	60.1	37.8	53.8	9.8	32.4	26.2	39.2	44.3	40.2	35.6	44	56.7	81.8
CENPQ	13.3	20.7	17.6	29.6	17.6	21.8	14.4	3.2	25.6	24.8	25.9	16.2	25.9	30.6	29.9	1.5	19.6	29	22.9	37.6
CENPT	47.6	87.1	55.9	37.5	61.5	31.7	42.6	126.4	89.4	99.2	131.1	85.4	57.9	57.9	71	69.1	127.7	78.3	69	74.1
CENPU	51.1	38.8	62.5	68.4	39.4	28.1	38.4	68.4	41.3	67	62.2	56.3	92.1	63.4	60.1	66.5	42.2	74	76.9	70.6
CEP104	43	62.5	75.05	48.65	57.05	40.3	16.8	17.9	62.25	80.9	72.5	68.65	67.05	52.15	47.25	69.45	20.55	34.15	42.2	76.7
CEP112	79.6	53.4	67.5	57.7	111.7	110.8	74.8	76.8	87.9	75	94.2	69.5	62.1	100.7	86.5	105.5	68.8	58.9	67.4	56.7
CEP131	19.4	6.4	42	26.1	6.3	6.1	6.6	12.6	24.4	8.3	23.2	9.3	39.3	18.6	9.3	30.5	8.2	6	6.8	6.6
CEP135	20.9	17.4	15.7	23.45	12.05	7.95	20.75	8.45	19.65	25.75	32.35	23.3	23.7	38.65	18.3	22.8	16.25	18.95	30.95	25.65
CEP152	12	12.7	14	9.65	5.75	9.4	12.85	7.3	4.25	12.1	13.9	11.25	11.4	18.75	12.5	10.75	4.5	5.95	14.1	15.1
CEP162	34.3	52.9	84.85	57.6	37.45	62.8	21.85	45.6	44.2	55.75	76.6	60.7	47.85	59.8	64.95	76.75	54.25	46.5	64.4	69.2
CEP164	51.8	74.8	103.65	71.15	66.45	40.9	54.1	64.9	52.4	66.1	74.6	50.35	73.25	61.05	56.7	57.05	79.75	75.05	89.8	107.95
CEP170B	139.6	164	229.5	209.6	233.4	177.9	168.8	254	189.8	256.8	259.4	231.5	231.2	176.7	121.4	152.2	239.9	174.7	242.2	294.3
CEP192	123.9	75.2	78.1	99.2	38.5	22.3	10.7	11.3	30.7	53	123.6	81.3	168.2	75.6	126.2	126	5	71.8	65	88.4
CEP250	48.95	72.4	79.4	47.9	63.25	52.15	85.9	98.95	74.9	85.55	88.3	66.5	39.25	84.15	63.5	96.35	66.15	59.7	67.2	105.25
CEP290	36.1	33	30.15	10.75	14.15	41.05	13.9	11.95	14.65	32.1	37.3	27.1	38.2	33	38.45	27.25	16.5	20.35	24.65	29.85
CEP350	129.65	178.475	201.625	135.875	149.475	189.325	91.825	106.25	175.075	176.775	175.525	146.75	135.375	122.95	127.6	120.95	104.825	114.575	117.575	139.125
CEP41	2.9	59.1	46.9	48.2	41	92.2	33.8	21	30.3	81.7	58.9	34.3	34.3	27.4	32	47.4	51.6	39.4	43.1	66.8
CEP55	17.8	3.1	4.4	7.2	1.3	4.8	5.8	8.1	8.4	11.2	24	7.3	15.4	23.9	23.3	25.8	14.4	15.6	13.1	11.8
CEP57	79.48	77.04	80.26	66.66	75.94	78.14	49.34	47.88	77.3	58.42	89.78	66.82	89.16	105.38	93.54	112.48	75.64	73.64	90.54	96.62
CEP63	102.25	73.15	92.8	79.1	81.05	100.8	35.75	33	80.35	84.5	62.4	90.45	95.55	122.15	115.05	126.4	72.3	60.05	60.1	56.35
CEP68	116.667	203.2	298.2	235.967	172.7	409.033	140.367	169.067	257.9	145.033	169.633	163.133	179.333	249.3	167.633	123.933	105.2	100.933	223.6	215.967
CEP70	29.5	40.9	41.1	57.4	60.8	65	66.7	36.8	44.3	81.1	58	48	36.1	21.2	53.2	23.5	33.7	52.8	79	99.7
CEP72	47.4	35.1	45.8	33.5	24.8	37.3	20.5	9	36	39.2	9	9	9.5	22.5	8.2	6.9	27.9	7.8	29.1	13.7
CEP76	13.3	12.55	18.7	18.9	16.95	18.5	11.75	11.5	14.5	15.35	11.4	29.95	23.15	12.8	17.75	11	14.3	24.45	17.95	17.25
CEP83	48.9	46.2	34.6	47.8	37.8	52.3	71.1	46	35.7	76.3	61	38.6	57	43.7	49.1	25.3	63.6	57.5	62.1	72.2
CEP85	51.8	83.5	112.5	78.4	110.9	70.5	123.3	51.3	85.8	147.9	102	113.8	81	45.7	118.7	92.4	49.8	98.7	126.5	151.2
CEP97	52.1	22.5	41.2	6.6	6.1	6.2	4.7	8.1	3.4	14.2	21.6	24.6	31.8	26.7	34.3	20.3	1.4	4.2	16.2	23.5
CEPT1	92.3	124.1	229.8	132.3	73.1	103	47.1	86.2	85.3	83.6	90	107	96.6	130.3	192.2	93.8	82.4	86	114.4	137.6
CER1	41.1	62	67.4	70.2	100.4	88.7	138.5	132.5	73.1	149.1	96.5	74.1	82.2	72.6	52.9	100.4	109.3	100.9	89.5	148
CERK	124.8	134.2	79.9	135.2	162.5	153.8	88.5	181.9	189.8	105	191.3	191.8	309.5	228.7	136.4	175.6	217.1	175.3	262.1	222.3
CERS2	400.8	503.1	346.6	504.9	532.3	358.3	593.7	291	564	549.5	278.6	413.7	290.1	500.3	468.4	618.1	622.3	546.1	592.2	507.7
CERS4	2.8	5	6.4	30.2	10.1	2.5	7.9	10.6	5.1	5.4	24.7	27.9	47.4	17.3	4.5	13.4	10.7	7.7	6.9	4.7
CERS6	171.8	192.85	206.45	143.65	95.2	122	103.35	135.8	118.75	159.45	225.5	135.7	95.85	137	116.3	109.9	113.2	117.7	139.65	101.05
CES1P1	1.7	2.2	3	2.3	2.2	3.3	4.7	11.8	2.2	15	10.6	4.8	11	4.7	2.3	16.3	3	1.9	4.1	4.3
CES2	141.233	195	240.633	199.3	232.633	224.467	263.367	239.533	256.433	228.7	258.9	234.7	206.867	193.867	242	229.133	260.233	303.1	282.4	317.267
CES3	80.3	107.3	142.6	73.7	108.1	86.4	31.7	87.8	116.8	139.7	93.2	161	117.4	100.6	142.1	126.4	257.3	179.4	154.8	203.9
CETN1	64.2	39.9	72.2	105.1	83.5	101.3	157.2	124.7	70.6	138.3	71.4	73.5	78.5	51.2	41.4	79	113	61.4	69.6	115.9
CETN2	65.8	180.3	214.4	220.3	61.7	241.4	164.2	145.9	174.7	131.1	244.4	292.1	142.4	237.9	333.6	267.8	246.6	249.6	326.5	258.3
CETN3	188	101.9	159.5	82.2	82.7	193.5	80.1	74.7	121.5	115.3	121.7	166.2	257	129.3	189.2	154	119.4	133.4	138	111.7
CETP	4.6	2.9	4.5	4.6	5.9	6.1	4.7	11.4	3.2	5.5	6.2	10.7	2.4	2.9	4.8	5	3.5	3.9	2.9	8.6
CFB	423.05	123.65	185.35	303.45	111.8	103.75	704.1	249.2	186.85	170.7	194.15	164.4	172.35	218.65	135.8	174.75	342.9	213.3	187.65	169.05
CFD	3083.5	5054.2	6893.7	3108.4	3182.4	2936.9	3189.4	4441.7	3599.2	3825	1196.7	2943.5	4259.5	3315.5	2284.7	6446	2448.5	2590.6	2388	4020.6
CFDP1	114.75	121.2	140.05	150.05	86.45	154.6	108.2	137.85	71.7	140.4	136.1	124.35	111.85	142.1	128.2	65.5	70.5	75.55	114.5	121.25
CFH	830.5	1268	1740.9	854.8	701.4	627.7	503.6	847.5	704.6	814.9	598.9	971.8	576	1062.7	1615.1	1344.3	668.1	545.7	1248.8	695.6
CFHR2	69	142.8	85	185	83.2	89.1	90.6	39	65.2	63.2	170.3	179.1	115.7	72.4	140	200.7	49.3	39.5	128.7	95.1
CFHR4	7.2	2.4	20.7	5.1	5.7	4.2	8.3	9.7	4.1	8.5	8.7	7	5.2	3	11.3	5.1	9	5.8	3.3	9.8
CFHR5	0.8	0.7	1.7	0.9	0.8	0.9	1.9	1.4	0.6	1.4	1.4	1.2	1.9	2	1.2	2.3	1.2	0.8	1.1	1.8
CFI	860.1	650.8	575.9	722.6	437.3	677.1	396	434.7	391.5	519.7	1341.2	1712.5	538.3	1345.5	1817	858.8	1525	1825.1	1657.4	1446.9
CFL1	5170.5	4348.1	7431.4	7083	4339.9	4937.1	5693.4	4923.2	4064.3	4496.6	6527.2	6330	5598.4	7578.4	6652.3	3133.6	5319.5	4838.8	4175	6088.6
CFLAR	230.1	381.855	310.191	216.864	207.1	189.664	252.191	230.309	309.809	227.582	200.082	262.882	214.209	211.245	191.045	160.855	110.945	157.218	183.391	222
CFP	2.8	3.7	4.5	2.1	6.1	4.9	4.3	5.1	5.7	4.6	3.6	2.2	8.6	4.2	4.7	9.4	2.9	5.3	2.2	3.5
CFTR	5.825	10.6	15.975	17.875	21.625	11.425	16.525	25.25	14.725	23.95	19.875	5.9	10.45	17.575	19.975	19.825	15.75	14.375	16.5	24.4
CGA	23.2	24	36.4	20.3	9.7	8.8	14.6	12.9	7.1	43.7	14.1	6.8	8.4	5	5.8	13.2	12.7	9.9	12.6	43.8
CGGBP1	350.2	487.2	481.8	300.8	502	399.7	497.9	449.7	283.1	457.4	347.5	330.6	350.9	320.8	378.7	383.8	221.5	291.7	280	357.6
CGREF1	62.5	12.7	32.4	34.8	10.1	5.3	31.9	24.8	22.8	5.4	50.8	36.8	45.8	47.5	41.6	23.1	64.4	44.5	15.7	9
CGRRF1	76.2	177.3	92.7	83.7	133.3	182	97.7	117.9	124.7	109.5	152	115.5	93.4	139.6	118.9	149.6	133.1	147	133	155.9
CH25H	45.7	111.3	43.1	178.3	43.8	150.8	105.3	231.8	83.8	85	69.7	23.8	25	116.7	57.1	44.6	20.7	8.2	44.1	72.7
CHAC1	8.1	14.2	25.6	10.4	15.4	12.1	30.9	36.6	14.9	25.4	27.8	19	20.4	13.9	19.6	12	13.2	20.8	19.8	23.7
CHAD	5.8	2	5.4	5.8	4.3	4.2	4.5	14.3	5.1	6.4	4.9	3	4.9	4.3	4.3	5.5	4.9	5.3	3.1	11
CHAF1A	31.1	31.2667	49.4333	29.7333	24.5667	21.0667	14.3667	34.9667	29.9667	33.1333	22.9333	27.6333	38.7	30.0333	27.5667	37.2	18.3667	6.86667	29.5	44.3
CHAF1B	2.9	10.7	5.4	4.4	3.8	2.5	4.2	6	12.5	5	4.7	2.8	3.2	3.3	7.1	3.1	11.4	2.9	4.6	3.2
CHAT	35.4	21.9	24	38.8	47.9	58.2	55.2	65.3	13	27.2	10.1	25.9	38.1	43	26.3	15.9	49.5	32.4	30	29.5
CHCHD2	2108.3	1874.7	1594.6	1879.2	2132.9	1698.7	1968.3	1611.2	1605	1712	1493.7	1845.4	2742.6	2236.5	2409.4	2623.6	2236.6	1806.2	1938	1761.3
CHCHD3	336.4	156.9	204.4	303.1	182.1	222.3	247.5	139.9	241.1	299.2	187.7	289.6	259.5	198.7	182.5	163.7	198.9	214.1	198.2	101.7
CHCHD7	186.4	208.3	132.5	107.9	187.1	166.6	104.8	92.7	124.1	125.2	110.2	95.6	149.3	117.5	122.7	208.8	100.8	95.5	105.4	78.5
CHD1	78.7	218.3	251.9	346.5	402.1	289.1	192.5	437.8	186.3	149.4	91.9	133.4	64.4	103.2	138.8	102.7	107	72.3	100.1	89.9
CHD1L	133.8	73.2	96.4	216.75	125.35	93.95	119.1	193.55	85.4	144.9	137.75	137.35	58.1	103.45	119.15	108.1	109.3	108.55	109.9	113.15
CHD2	2.8	61.5	56.7	57.8	70.4	78.2	65.6	22.1	44.6	100.2	31.5	66.1	33.6	42.2	29.6	28	14.8	19.3	63.9	107.9
CHD3	90.5	129.1	137.85	107.6	161.65	97	128.5	275.3	157.3	108.35	196.15	106.65	123.5	163.05	123.15	194.55	150.2	187.4	209.5	207.45
CHD4	191.233	251.433	319.5	414.033	283.033	229.6	268.8	230	190.733	208	378.567	305.167	288.233	319.467	206.933	276.9	156.267	213	210.6	253.3
CHD5	15.5	18.9	30.45	25.7	7.2	20.8	12	21.9	8.3	50.55	28.85	8.45	22.9	23.4	17.95	16.1	10.7	8.8	19.35	23.55
CHD7	47.95	44.05	77.55	60.5	76.45	71.65	83.1	49.85	40.3	78.95	44.75	44.15	30.8	36.65	43.2	46.3	77.05	46.3	58.35	66.1
CHD8	145.3	164.5	212.9	199.9	228.8	141.4	159.3	245	196	193.7	235.9	183.3	76.1	140.7	135.7	131	186.1	182	157.5	164.2
CHD9	179.167	220.567	234.333	180.733	224.467	324.867	93.5	86.4	254.533	223.267	278.367	249.367	161.733	158.267	187.2	167.133	206.433	208.133	232.767	167.4
CHEK1	18.65	11.45	30.05	26.3	17.2	22.7	15.05	15.7	19.8	29.8	33.05	20.45	8.4	29.8	27.9	25.35	20.35	23.35	18.3	20.2
CHEK2	160.3	83.3	79.7	103.8	75.5	79.8	71.6	118	63.8	136.9	114.7	141.9	112.8	113.5	94.9	128.1	117.2	122.4	125.4	180.9
CHERP	164.6	127.5	123.1	153.05	182.4	110.7	142.3	111.45	157.65	188.8	101.45	107.05	178.8	99.3	115.75	58.45	128.55	123.4	140.4	194.2
CHFR	180.5	177.3	207.5	214.5	265.4	160.2	200.9	194	211	205.3	263.1	185.7	277.7	179.4	237.9	269.5	296.1	321	194.4	209.9
CHGA	2.3	17.1	17.6	47.3	5.4	8.7	2.3	15.2	2	32.5	47.9	8.7	24.7	15.7	10.3	58.1	3.9	2	19.6	20.2
CHGB	32	42.9	48.3	53.3	46	44.7	50.6	42.3	56.2	60.3	72.6	45.1	47.3	53	46.4	45.2	35.2	27.8	44.5	70.7
CHI3L1	2438.53	171.5	408.4	1913.93	485.233	585.467	1958.9	1152.6	2260.47	114.833	524.2	527.633	531.4	759.8	1591.07	674.033	1183.27	812.733	504.7	312.267
CHI3L2	5523.9	319.5	299.9	1171.7	409	291	2185.5	502.6	488.2	265.8	435.9	536.7	429.5	1120.1	1125.4	120.9	1684	1327.1	447.9	454.9
CHIA	45.3	26.6	58	31	46.7	40	37.2	38.3	36.8	42.2	74.3	38.5	36.7	44.9	45.4	27.2	43.4	42.5	39.3	75.5
CHIC2	212	199.4	191	131.2	235.9	209	274.2	277.2	215.7	180.7	158.2	182.7	211.6	132.2	159	158.3	195.6	196.6	189.2	187.2
CHIT1	4.9	2.7	6	9.9	10.2	8.8	11.4	25	9.1	29.8	14.2	7.7	9.2	165	33.4	11.2	33.8	47.4	17.9	22.4
CHKA	87.15	129.8	85.5	119.75	31.95	28.95	18.2	58.2	92.4	53	63.95	66.35	100.3	29.65	44.85	26.6	29.35	26.3	74.35	60.95
CHKB	112.2	196.6	354.7	246.9	209	169.1	210	219.4	291.7	291.8	285.2	208.9	209.5	286.9	264.7	308.9	351.1	367.3	337.5	406.2
[truncated: 10,549 more rows]
